# Supplementary material
Source: publisher site journal article supplement (https://www.dovepress.com/get_supplementary_file.php?f=373007.xlsx)
Supplement: Supplementary file 1 [file get_supplementary_file.php]

## Sheet: Sheet1
iso_code	continent	location	date	total_cases	new_cases	new_cases_smoothed	total_deaths	new_deaths	new_deaths_smoothed	total_cases_per_million	new_cases_per_million	new_cases_smoothed_per_million	total_deaths_per_million	new_deaths_per_million	new_deaths_smoothed_per_million	reproduction_rate	icu_patients	icu_patients_per_million	hosp_patients	hosp_patients_per_million	weekly_icu_admissions	weekly_icu_admissions_per_million	weekly_hosp_admissions	weekly_hosp_admissions_per_million	total_tests	new_tests	total_tests_per_thousand	new_tests_per_thousand	new_tests_smoothed	new_tests_smoothed_per_thousand	positive_rate	tests_per_case	tests_units	total_vaccinations	people_vaccinated	people_fully_vaccinated	total_boosters	new_vaccinations	new_vaccinations_smoothed	total_vaccinations_per_hundred	people_vaccinated_per_hundred	people_fully_vaccinated_per_hundred	total_boosters_per_hundred	new_vaccinations_smoothed_per_million	new_people_vaccinated_smoothed	new_people_vaccinated_smoothed_per_hundred	stringency_index	population	population_density
SAU	Asia	Saudi Arabia	2020-03-03	1	0					0.028	0														400	240	0.011	0.007					tests performed														11.11	35340680	15.322
SAU	Asia	Saudi Arabia	2020-03-04	1	0					0.028	0														698	298	0.02	0.008					tests performed														11.11	35340680	15.322
SAU	Asia	Saudi Arabia	2020-03-05	5	4					0.141	0.113														1185	487	0.034	0.014					tests performed														11.11	35340680	15.322
SAU	Asia	Saudi Arabia	2020-03-06	5	0					0.141	0														2209	1024	0.063	0.029					tests performed														11.11	35340680	15.322
SAU	Asia	Saudi Arabia	2020-03-07	5	0	0.714				0.141	0	0.02													4191	1982	0.119	0.056					tests performed														11.11	35340680	15.322
SAU	Asia	Saudi Arabia	2020-03-08	11	6	1.571				0.311	0.17	0.044													5979	1788	0.169	0.051					tests performed														19.44	35340680	15.322
SAU	Asia	Saudi Arabia	2020-03-09	15	4	2				0.424	0.113	0.057													8180	2201	0.231	0.062	1146	0.032	0.0017	573	tests performed														30.56	35340680	15.322
SAU	Asia	Saudi Arabia	2020-03-10	20	5	2.714				0.566	0.141	0.077													11835	3655	0.335	0.103	1634	0.046	0.0017	602.1	tests performed														30.56	35340680	15.322
SAU	Asia	Saudi Arabia	2020-03-11	21	1	2.857				0.594	0.028	0.081													14834	2999	0.42	0.085	2019	0.057	0.0014	706.7	tests performed														30.56	35340680	15.322
SAU	Asia	Saudi Arabia	2020-03-12	45	24	5.714				1.273	0.679	0.162													18478	3644	0.523	0.103	2470	0.07	0.0023	432.3	tests performed														30.56	35340680	15.322
SAU	Asia	Saudi Arabia	2020-03-13	86	41	11.571				2.433	1.16	0.327													22368	3890	0.633	0.11	2880	0.081	0.004	248.9	tests performed														41.67	35340680	15.322
SAU	Asia	Saudi Arabia	2020-03-14	103	17	14				2.914	0.481	0.396													25351	2983	0.717	0.084	3023	0.086	0.0046	215.9	tests performed														41.67	35340680	15.322
SAU	Asia	Saudi Arabia	2020-03-15	103	0	13.143				2.914	0	0.372				2.04									28055	2704	0.794	0.077	3154	0.089	0.0042	240	tests performed														52.78	35340680	15.322
SAU	Asia	Saudi Arabia	2020-03-16	118	15	14.714				3.339	0.424	0.416				2.08									31610	3555	0.894	0.101	3347	0.095	0.0044	227.5	tests performed														68.52	35340680	15.322
SAU	Asia	Saudi Arabia	2020-03-17	171	53	21.571				4.839	1.5	0.61				2.14									35818	4208	1.014	0.119	3426	0.097	0.0063	158.8	tests performed														68.52	35340680	15.322
SAU	Asia	Saudi Arabia	2020-03-18	171	0	21.429				4.839	0	0.606				2.17									39423	3605	1.116	0.102	3513	0.099	0.0061	163.9	tests performed														68.52	35340680	15.322
SAU	Asia	Saudi Arabia	2020-03-19	274	103	32.714				7.753	2.914	0.926				2.23									43661	4238	1.235	0.12	3598	0.102	0.0091	110	tests performed														68.52	35340680	15.322
SAU	Asia	Saudi Arabia	2020-03-20	344	70	36.857				9.734	1.981	1.043				2.21									48437	4776	1.371	0.135	3724	0.105	0.0099	101	tests performed														68.52	35340680	15.322
SAU	Asia	Saudi Arabia	2020-03-21	392	48	41.286				11.092	1.358	1.168				2.17									54135	5698	1.532	0.161	4112	0.116	0.01	99.6	tests performed														79.63	35340680	15.322
SAU	Asia	Saudi Arabia	2020-03-22	511	119	58.286				14.459	3.367	1.649				2.14									60168	6033	1.703	0.171	4588	0.13	0.0127	78.7	tests performed														79.63	35340680	15.322
SAU	Asia	Saudi Arabia	2020-03-23	562	51	63.429				15.902	1.443	1.795				2.08									67170	7002	1.901	0.198	5080	0.144	0.0125	80.1	tests performed														87.04	35340680	15.322
SAU	Asia	Saudi Arabia	2020-03-24	767	205	85.143	1	1		21.703	5.801	2.409	0.028	0.028		2.03									73081	5911	2.068	0.167	5323	0.151	0.016	62.5	tests performed														87.04	35340680	15.322
SAU	Asia	Saudi Arabia	2020-03-25	900	133	104.143	2	1		25.466	3.763	2.947	0.057	0.028		1.95									78078	4997	2.209	0.141	5522	0.156	0.0189	53	tests performed														89.81	35340680	15.322
SAU	Asia	Saudi Arabia	2020-03-26	1012	112	105.429	3	1		28.636	3.169	2.983	0.085	0.028		1.84									83751	5673	2.37	0.161	5727	0.162	0.0184	54.3	tests performed														89.81	35340680	15.322
SAU	Asia	Saudi Arabia	2020-03-27	1104	92	108.571	3	0		31.239	2.603	3.072	0.085	0		1.77									89860	6109	2.543	0.173	5918	0.167	0.0183	54.5	tests performed														89.81	35340680	15.322
SAU	Asia	Saudi Arabia	2020-03-28	1203	99	115.857	4	1		34.04	2.801	3.278	0.113	0.028		1.72									95804	5944	2.711	0.168	5953	0.168	0.0195	51.4	tests performed														89.81	35340680	15.322
SAU	Asia	Saudi Arabia	2020-03-29	1299	96	112.571	8	4	1.143	36.757	2.716	3.185	0.226	0.113	0.032	1.68									102069	6265	2.888	0.177	5986	0.169	0.0188	53.2	tests performed														89.81	35340680	15.322
SAU	Asia	Saudi Arabia	2020-03-30	1453	154	127.286	8	0	1.143	41.114	4.358	3.602	0.226	0	0.032	1.65									108963	6894	3.083	0.195	5970	0.169	0.0213	46.9	tests performed														89.81	35340680	15.322
SAU	Asia	Saudi Arabia	2020-03-31	1563	110	113.714	10	2	1.286	44.227	3.113	3.218	0.283	0.057	0.036	1.62									116325	7362	3.292	0.208	6178	0.175	0.0184	54.3	tests performed														89.81	35340680	15.322
SAU	Asia	Saudi Arabia	2020-04-01	1720	157	117.143	16	6	2	48.669	4.442	3.315	0.453	0.17	0.057	1.61									123706	7381	3.5	0.209	6518	0.184	0.018	55.6	tests performed														89.81	35340680	15.322
SAU	Asia	Saudi Arabia	2020-04-02	1885	165	124.714	21	5	2.571	53.338	4.669	3.529	0.594	0.141	0.073	1.59									131394	7688	3.718	0.218	6806	0.193	0.0183	54.6	tests performed														89.81	35340680	15.322
SAU	Asia	Saudi Arabia	2020-04-03	2039	154	133.571	25	4	3.143	57.696	4.358	3.78	0.707	0.113	0.089	1.59									139406	8012	3.945	0.227	7078	0.2	0.0189	53	tests performed														89.81	35340680	15.322
SAU	Asia	Saudi Arabia	2020-04-04	2179	140	139.429	29	4	3.571	61.657	3.961	3.945	0.821	0.113	0.101	1.59									147185	7779	4.165	0.22	7340	0.208	0.019	52.6	tests performed														89.81	35340680	15.322
SAU	Asia	Saudi Arabia	2020-04-05	2402	223	157.571	34	5	3.714	67.967	6.31	4.459	0.962	0.141	0.105	1.6									153963	6778	4.357	0.192	7413	0.21	0.0213	47	tests performed														89.81	35340680	15.322
SAU	Asia	Saudi Arabia	2020-04-06	2605	203	164.571	38	4	4.286	73.711	5.744	4.657	1.075	0.113	0.121	1.61									160795	6832	4.55	0.193	7405	0.21	0.0222	45	tests performed														91.67	35340680	15.322
SAU	Asia	Saudi Arabia	2020-04-07	2795	190	176	41	3	4.429	79.087	5.376	4.98	1.16	0.085	0.125	1.61									167179	6384	4.73	0.181	7265	0.206	0.0242	41.3	tests performed														91.67	35340680	15.322
SAU	Asia	Saudi Arabia	2020-04-08	2932	137	173.143	41	0	3.571	82.964	3.877	4.899	1.16	0	0.101	1.63									173566	6387	4.911	0.181	7123	0.202	0.0243	41.1	tests performed														91.67	35340680	15.322
SAU	Asia	Saudi Arabia	2020-04-09	3287	355	200.286	44	3	3.286	93.009	10.045	5.667	1.245	0.085	0.093	1.66									180385	6819	5.104	0.193	6999	0.198	0.0286	34.9	tests performed														91.67	35340680	15.322
SAU	Asia	Saudi Arabia	2020-04-10	3651	364	230.286	47	3	3.143	103.309	10.3	6.516	1.33	0.085	0.089	1.69									187826	7441	5.315	0.211	6917	0.196	0.0333	30	tests performed														91.67	35340680	15.322
SAU	Asia	Saudi Arabia	2020-04-11	4033	382	264.857	52	5	3.286	114.118	10.809	7.494	1.471	0.141	0.093	1.7									196819	8993	5.569	0.254	7091	0.201	0.0374	26.8	tests performed														91.67	35340680	15.322
SAU	Asia	Saudi Arabia	2020-04-12	4462	429	294.286	59	7	3.571	126.257	12.139	8.327	1.669	0.198	0.101	1.71									204184	7365	5.778	0.208	7174	0.203	0.041	24.4	tests performed														91.67	35340680	15.322
SAU	Asia	Saudi Arabia	2020-04-13	4934	472	332.714	65	6	3.857	139.612	13.356	9.414	1.839	0.17	0.109	1.71									212403	8219	6.01	0.233	7373	0.209	0.0451	22.2	tests performed														91.67	35340680	15.322
SAU	Asia	Saudi Arabia	2020-04-14	5369	435	367.714	73	8	4.571	151.921	12.309	10.405	2.066	0.226	0.129	1.71									220791	8388	6.248	0.237	7659	0.217	0.048	20.8	tests performed														91.67	35340680	15.322
SAU	Asia	Saudi Arabia	2020-04-15	5862	493	418.571	79	6	5.429	165.871	13.95	11.844	2.235	0.17	0.154	1.71									228460	7669	6.465	0.217	7842	0.222	0.0534	18.7	tests performed														91.67	35340680	15.322
SAU	Asia	Saudi Arabia	2020-04-16	6380	518	441.857	83	4	5.571	180.529	14.657	12.503	2.349	0.113	0.158	1.72									236716	8256	6.698	0.234	8047	0.228	0.0549	18.2	tests performed														91.67	35340680	15.322
SAU	Asia	Saudi Arabia	2020-04-17	7142	762	498.714	87	4	5.714	202.09	21.562	14.112	2.462	0.113	0.162	1.73									245722	9006	6.953	0.255	8271	0.234	0.0603	16.6	tests performed														91.67	35340680	15.322
SAU	Asia	Saudi Arabia	2020-04-18	8274	1132	605.857	92	5	5.714	234.121	32.031	17.143	2.603	0.141	0.162	1.73									254455	8733	7.2	0.247	8234	0.233	0.0736	13.6	tests performed														91.67	35340680	15.322
SAU	Asia	Saudi Arabia	2020-04-19	9362	1088	700	97	5	5.429	264.907	30.786	19.807	2.745	0.141	0.154	1.71									264033	9578	7.471	0.271	8550	0.242	0.0819	12.2	tests performed														91.67	35340680	15.322
SAU	Asia	Saudi Arabia	2020-04-20	10484	1122	792.857	103	6	5.429	296.655	31.748	22.435	2.914	0.17	0.154	1.67									273293	9260	7.733	0.262	8699	0.246	0.0911	11	tests performed														91.67	35340680	15.322
SAU	Asia	Saudi Arabia	2020-04-21	11631	1147	894.571	109	6	5.143	329.111	32.456	25.313	3.084	0.17	0.146	1.63									282515	9222	7.994	0.261	8818	0.25	0.1014	9.9	tests performed														91.67	35340680	15.322
SAU	Asia	Saudi Arabia	2020-04-22	12772	1141	987.143	114	5	5	361.397	32.286	27.932	3.226	0.141	0.141	1.58									292855	10340	8.287	0.293	9199	0.26	0.1073	9.3	tests performed														91.67	35340680	15.322
SAU	Asia	Saudi Arabia	2020-04-23	13930	1158	1078.57	121	7	5.429	394.163	32.767	30.519	3.424	0.198	0.154	1.54									301402	8547	8.528	0.242	9241	0.261	0.1167	8.6	tests performed														91.67	35340680	15.322
SAU	Asia	Saudi Arabia	2020-04-24	15102	1172	1137.14	127	6	5.714	427.326	33.163	32.177	3.594	0.17	0.162	1.5									311605	10203	8.817	0.289	9412	0.266	0.1208	8.3	tests performed														91.67	35340680	15.322
SAU	Asia	Saudi Arabia	2020-04-25	16299	1197	1146.43	136	9	6.286	461.197	33.87	32.439	3.848	0.255	0.178	1.46									320660	9055	9.073	0.256	9458	0.268	0.1212	8.2	tests performed														91.67	35340680	15.322
SAU	Asia	Saudi Arabia	2020-04-26	17522	1223	1165.71	139	3	6	495.803	34.606	32.985	3.933	0.085	0.17	1.43									329627	8967	9.327	0.254	9371	0.265	0.1244	8	tests performed														94.44	35340680	15.322
SAU	Asia	Saudi Arabia	2020-04-27	18811	1289	1189.57	144	5	5.857	532.276	36.474	33.66	4.075	0.141	0.166	1.4									338952	9325	9.591	0.264	9380	0.265	0.1268	7.9	tests performed														94.44	35340680	15.322
SAU	Asia	Saudi Arabia	2020-04-28	20077	1266	1206.57	152	8	6.143	568.099	35.823	34.141	4.301	0.226	0.174	1.37									349839	10887	9.899	0.308	9618	0.272	0.1254	8	tests performed														94.44	35340680	15.322
SAU	Asia	Saudi Arabia	2020-04-29	21402	1325	1232.86	157	5	6.143	605.591	37.492	34.885	4.442	0.141	0.174	1.35									359497	9658	10.172	0.273	9520	0.269	0.1295	7.7	tests performed														94.44	35340680	15.322
SAU	Asia	Saudi Arabia	2020-04-30	22753	1351	1260.43	162	5	5.857	643.819	38.228	35.665	4.584	0.141	0.166	1.33									368785	9288	10.435	0.263	9626	0.272	0.1309	7.6	tests performed														91.67	35340680	15.322
SAU	Asia	Saudi Arabia	2020-05-01	24097	1344	1285	169	7	6	681.849	38.03	36.36	4.782	0.198	0.17	1.31									381605	12820	10.798	0.363	10000	0.283	0.1285	7.8	tests performed														91.67	35340680	15.322
SAU	Asia	Saudi Arabia	2020-05-02	25459	1362	1308.57	176	7	5.714	720.388	38.539	37.027	4.98	0.198	0.162	1.3									394385	12780	11.16	0.362	10532	0.298	0.1242	8	tests performed														91.67	35340680	15.322
SAU	Asia	Saudi Arabia	2020-05-03	27011	1552	1355.57	184	8	6.429	764.303	43.915	38.357	5.206	0.226	0.182	1.29									406391	12006	11.499	0.34	10966	0.31	0.1236	8.1	tests performed														91.67	35340680	15.322
SAU	Asia	Saudi Arabia	2020-05-04	28656	1645	1406.43	191	7	6.714	810.85	46.547	39.796	5.405	0.198	0.19	1.28									417905	11514	11.825	0.326	11279	0.319	0.1247	8	tests performed														91.67	35340680	15.322
SAU	Asia	Saudi Arabia	2020-05-05	30251	1595	1453.43	200	9	6.857	855.982	45.132	41.126	5.659	0.255	0.194	1.28									430957	13052	12.194	0.369	11588	0.328	0.1254	8	tests performed														91.67	35340680	15.322
SAU	Asia	Saudi Arabia	2020-05-06	31938	1687	1505.14	209	9	7.429	903.718	47.735	42.59	5.914	0.255	0.21	1.27									446983	16026	12.648	0.453	12498	0.354	0.1204	8.3	tests performed														91.67	35340680	15.322
SAU	Asia	Saudi Arabia	2020-05-07	33731	1793	1568.29	219	10	8.143	954.452	50.735	44.376	6.197	0.283	0.23	1.26									460020	13037	13.017	0.369	13034	0.369	0.1203	8.3	tests performed														89.81	35340680	15.322
SAU	Asia	Saudi Arabia	2020-05-08	35432	1701	1619.29	229	10	8.571	1002.58	48.132	45.819	6.48	0.283	0.243	1.25									474798	14778	13.435	0.418	13313	0.377	0.1216	8.2	tests performed														89.81	35340680	15.322
SAU	Asia	Saudi Arabia	2020-05-09	37136	1704	1668.14	239	10	9	1050.8	48.216	47.202	6.763	0.283	0.255	1.24									490942	16144	13.892	0.457	13794	0.39	0.1209	8.3	tests performed														89.81	35340680	15.322
SAU	Asia	Saudi Arabia	2020-05-10	39048	1912	1719.57	246	7	8.857	1104.9	54.102	48.657	6.961	0.198	0.251	1.24									508667	17725	14.393	0.502	14611	0.413	0.1177	8.5	tests performed														89.81	35340680	15.322
SAU	Asia	Saudi Arabia	2020-05-11	41014	1966	1765.43	255	9	9.143	1160.53	55.63	49.955	7.215	0.255	0.259	1.23									523672	15005	14.818	0.425	15110	0.428	0.1168	8.6	tests performed														89.81	35340680	15.322
SAU	Asia	Saudi Arabia	2020-05-12	42925	1911	1810.57	264	9	9.143	1214.61	54.074	51.232	7.47	0.255	0.259	1.23									538246	14574	15.23	0.412	15327	0.434	0.1181	8.5	tests performed														89.81	35340680	15.322
SAU	Asia	Saudi Arabia	2020-05-13	44830	1905	1841.71	273	9	9.143	1268.51	53.904	52.113	7.725	0.255	0.259	1.23									554885	16639	15.701	0.471	15415	0.436	0.1195	8.4	tests performed														89.81	35340680	15.322
SAU	Asia	Saudi Arabia	2020-05-14	46869	2039	1876.86	283	10	9.143	1326.2	57.696	53.108	8.008	0.283	0.259	1.22									571563	16678	16.173	0.472	15935	0.451	0.1178	8.5	tests performed														89.81	35340680	15.322
SAU	Asia	Saudi Arabia	2020-05-15	49176	2307	1963.43	292	9	9	1391.48	65.279	55.557	8.262	0.255	0.255	1.22									589321	17758	16.675	0.502	16360	0.463	0.12	8.3	tests performed														89.81	35340680	15.322
SAU	Asia	Saudi Arabia	2020-05-16	52016	2840	2125.71	302	10	9	1471.85	80.361	60.149	8.545	0.283	0.255	1.22									627703	38382	17.761	1.086	19537	0.553	0.1088	9.2	tests performed														89.81	35340680	15.322
SAU	Asia	Saudi Arabia	2020-05-17	54752	2736	2243.43	312	10	9.429	1549.26	77.418	63.48	8.828	0.283	0.267	1.21									643252	15549	18.201	0.44	19226	0.544	0.1167	8.6	tests performed														89.81	35340680	15.322
SAU	Asia	Saudi Arabia	2020-05-18	57345	2593	2333	320	8	9.286	1622.63	73.372	66.015	9.055	0.226	0.263	1.19									659382	16130	18.658	0.456	19387	0.549	0.1203	8.3	tests performed														89.81	35340680	15.322
SAU	Asia	Saudi Arabia	2020-05-19	59854	2509	2418.43	329	9	9.286	1693.63	70.995	68.432	9.309	0.255	0.263	1.17									677476	18094	19.17	0.512	19890	0.563	0.1216	8.2	tests performed														89.81	35340680	15.322
SAU	Asia	Saudi Arabia	2020-05-20	62545	2691	2530.71	339	10	9.429	1769.77	76.145	71.609	9.592	0.283	0.267	1.15									692456	14980	19.594	0.424	19653	0.556	0.1288	7.8	tests performed														89.81	35340680	15.322
SAU	Asia	Saudi Arabia	2020-05-21	65077	2532	2601.14	351	12	9.714	1841.42	71.645	73.602	9.932	0.34	0.275	1.13									708355	15899	20.044	0.45	19542	0.553	0.1331	7.5	tests performed														89.81	35340680	15.322
SAU	Asia	Saudi Arabia	2020-05-22	67719	2642	2649	364	13	10.286	1916.18	74.758	74.956	10.3	0.368	0.291	1.1									725913	17558	20.54	0.497	19513	0.552	0.1358	7.4	tests performed														89.81	35340680	15.322
SAU	Asia	Saudi Arabia	2020-05-23	70161	2442	2592.14	379	15	11	1985.28	69.099	73.347	10.724	0.424	0.311	1.08									744832	18919	21.076	0.535	16733	0.473	0.1549	6.5	tests performed														91.67	35340680	15.322
SAU	Asia	Saudi Arabia	2020-05-24	72560	2399	2544	390	11	11.143	2053.16	67.882	71.985	11.035	0.311	0.315	1.06									763377	18545	21.601	0.525	17161	0.486	0.1482	6.7	tests performed														91.67	35340680	15.322
SAU	Asia	Saudi Arabia	2020-05-25	74795	2235	2492.86	399	9	11.286	2116.4	63.242	70.538	11.29	0.255	0.319	1.04									780041	16664	22.072	0.472	17237	0.488	0.1446	6.9	tests performed														91.67	35340680	15.322
SAU	Asia	Saudi Arabia	2020-05-26	76726	1931	2410.29	411	12	11.714	2171.04	54.64	68.201	11.63	0.34	0.331	1.02									795566	15525	22.511	0.439	16870	0.477	0.1429	7	tests performed														91.67	35340680	15.322
SAU	Asia	Saudi Arabia	2020-05-27	78541	1815	2285.14	425	14	12.286	2222.4	51.357	64.66	12.026	0.396	0.348	1.01									811994	16428	22.976	0.465	17077	0.483	0.1338	7.5	tests performed														91.67	35340680	15.322
SAU	Asia	Saudi Arabia	2020-05-28	80185	1644	2158.29	441	16	12.857	2268.91	46.519	61.071	12.479	0.453	0.364	1									828763	16769	23.451	0.474	17201	0.487	0.1255	8	tests performed														91.67	35340680	15.322
SAU	Asia	Saudi Arabia	2020-05-29	81766	1581	2006.71	458	17	13.429	2313.65	44.736	56.782	12.96	0.481	0.38	1.01									847867	19104	23.991	0.541	17422	0.493	0.1152	8.7	tests performed														91.67	35340680	15.322
SAU	Asia	Saudi Arabia	2020-05-30	83384	1618	1889	480	22	14.429	2359.43	45.783	53.451	13.582	0.623	0.408	1.02									864067	16200	24.45	0.458	17034	0.482	0.1109	9	tests performed														91.67	35340680	15.322
SAU	Asia	Saudi Arabia	2020-05-31	85261	1877	1814.43	503	23	16.143	2412.55	53.112	51.341	14.233	0.651	0.457	1.03									879921	15854	24.898	0.449	16649	0.471	0.109	9.2	tests performed														81.94	35340680	15.322
SAU	Asia	Saudi Arabia	2020-06-01	87142	1881	1763.86	525	22	18	2465.77	53.225	49.91	14.855	0.623	0.509	1.06									895285	15364	25.333	0.435	16463	0.466	0.1071	9.3	tests performed														81.94	35340680	15.322
SAU	Asia	Saudi Arabia	2020-06-02	89011	1869	1755	549	24	19.714	2518.66	52.885	49.659	15.535	0.679	0.558	1.08									912261	16976	25.813	0.48	16671	0.472	0.1053	9.5	tests performed														81.94	35340680	15.322
SAU	Asia	Saudi Arabia	2020-06-03	91182	2171	1805.86	579	30	22	2580.09	61.431	51.099	16.383	0.849	0.623	1.11									928507	16246	26.273	0.46	16645	0.471	0.1085	9.2	tests performed														81.94	35340680	15.322
SAU	Asia	Saudi Arabia	2020-06-04	93157	1975	1853.14	611	32	24.286	2635.97	55.885	52.437	17.289	0.905	0.687	1.14									950270	21763	26.889	0.616	17358	0.491	0.1068	9.4	tests performed														81.94	35340680	15.322
SAU	Asia	Saudi Arabia	2020-06-05	95748	2591	1997.43	642	31	26.286	2709.29	73.315	56.519	18.166	0.877	0.744	1.17									974499	24229	27.574	0.686	18090	0.512	0.1104	9.1	tests performed														81.94	35340680	15.322
SAU	Asia	Saudi Arabia	2020-06-06	98869	3121	2212.14	676	34	28	2797.6	88.312	62.595	19.128	0.962	0.792	1.19									999535	25036	28.283	0.708	19353	0.548	0.1143	8.7	tests performed														81.94	35340680	15.322
SAU	Asia	Saudi Arabia	2020-06-07	101914	3045	2379	712	36	29.857	2883.76	86.161	67.316	20.147	1.019	0.845	1.21									1018113	18578	28.809	0.526	19742	0.559	0.1205	8.3	tests performed														81.94	35340680	15.322
SAU	Asia	Saudi Arabia	2020-06-08	105283	3369	2591.57	746	34	31.571	2979.09	95.329	73.331	21.109	0.962	0.893	1.22									1038971	20858	29.399	0.59	20527	0.581	0.1263	7.9	tests performed														81.94	35340680	15.322
SAU	Asia	Saudi Arabia	2020-06-09	108571	3288	2794.29	783	37	33.429	3072.12	93.037	79.067	22.156	1.047	0.946	1.23									1061110	22139	30.025	0.626	21264	0.602	0.1314	7.6	tests performed														81.94	35340680	15.322
SAU	Asia	Saudi Arabia	2020-06-10	112288	3717	3015.14	819	36	34.286	3177.3	105.176	85.316	23.174	1.019	0.97	1.24									1083610	22500	30.662	0.637	22158	0.627	0.1361	7.3	tests performed														81.94	35340680	15.322
SAU	Asia	Saudi Arabia	2020-06-11	116021	3733	3266.29	857	38	35.143	3282.93	105.629	92.423	24.25	1.075	0.994	1.23									1110934	27324	31.435	0.773	22952	0.649	0.1423	7	tests performed														81.94	35340680	15.322
SAU	Asia	Saudi Arabia	2020-06-12	119942	3921	3456.29	893	36	35.857	3393.88	110.949	97.799	25.268	1.019	1.015	1.23									1128319	17385	31.927	0.492	21974	0.622	0.1573	6.4	tests performed														81.94	35340680	15.322
SAU	Asia	Saudi Arabia	2020-06-13	123308	3366	3491.29	932	39	36.571	3489.12	95.244	98.789	26.372	1.104	1.035	1.22									1147696	19377	32.475	0.548	21166	0.599	0.1649	6.1	tests performed														81.94	35340680	15.322
SAU	Asia	Saudi Arabia	2020-06-14	127541	4233	3661	972	40	37.143	3608.9	119.777	103.592	27.504	1.132	1.051	1.21									1167951	20255	33.048	0.573	21405	0.606	0.171	5.8	tests performed														81.94	35340680	15.322
SAU	Asia	Saudi Arabia	2020-06-15	132048	4507	3823.57	1011	39	37.857	3736.43	127.53	108.192	28.607	1.104	1.071	1.2									1185580	17629	33.547	0.499	20944	0.593	0.1826	5.5	tests performed														81.94	35340680	15.322
SAU	Asia	Saudi Arabia	2020-06-16	136315	4267	3963.43	1052	41	38.429	3857.17	120.739	112.149	29.767	1.16	1.087	1.19									1209064	23484	34.212	0.665	21136	0.598	0.1875	5.3	tests performed														81.94	35340680	15.322
SAU	Asia	Saudi Arabia	2020-06-17	141234	4919	4135.14	1091	39	38.857	3996.36	139.188	117.008	30.871	1.104	1.1	1.17									1239571	30507	35.075	0.863	22280	0.63	0.1856	5.4	tests performed														81.94	35340680	15.322
SAU	Asia	Saudi Arabia	2020-06-18	145991	4757	4281.43	1139	48	40.286	4130.96	134.604	121.147	32.229	1.358	1.14	1.14									1265587	26016	35.811	0.736	22093	0.625	0.1938	5.2	tests performed														81.94	35340680	15.322
SAU	Asia	Saudi Arabia	2020-06-19	150292	4301	4335.71	1184	45	41.571	4252.66	121.701	122.683	33.502	1.273	1.176	1.11									1290295	24708	36.51	0.699	23139	0.655	0.1874	5.3	tests performed														81.94	35340680	15.322
SAU	Asia	Saudi Arabia	2020-06-20	154233	3941	4417.86	1230	46	42.571	4364.18	111.515	125.008	34.804	1.302	1.205	1.09									1325951	35656	37.519	1.009	25465	0.721	0.1735	5.8	tests performed														81.94	35340680	15.322
SAU	Asia	Saudi Arabia	2020-06-21	157612	3379	4295.86	1267	37	42.143	4459.79	95.612	121.556	35.851	1.047	1.192	1.06									1359565	33614	38.47	0.951	27373	0.775	0.1569	6.4	tests performed														71.3	35340680	15.322
SAU	Asia	Saudi Arabia	2020-06-22	161005	3393	4136.71	1307	40	42.286	4555.8	96.008	117.052	36.983	1.132	1.197	1.05									1386818	27253	39.241	0.771	28748	0.813	0.1439	6.9	tests performed														71.3	35340680	15.322
SAU	Asia	Saudi Arabia	2020-06-23	164144	3139	3975.57	1346	39	42	4644.62	88.821	112.493	38.086	1.104	1.188	1.03									1421329	34511	40.218	0.977	30324	0.858	0.1311	7.6	tests performed														71.3	35340680	15.322
SAU	Asia	Saudi Arabia	2020-06-24	167267	3123	3719	1387	41	42.286	4732.99	88.368	105.233	39.247	1.16	1.197	1.03									1459069	37740	41.286	1.068	31357	0.887	0.1186	8.4	tests performed														71.3	35340680	15.322
SAU	Asia	Saudi Arabia	2020-06-25	170639	3372	3521.14	1428	41	41.286	4828.4	95.414	99.634	40.407	1.16	1.168	1.02									1497539	38470	42.374	1.089	33136	0.938	0.1063	9.4	tests performed														71.3	35340680	15.322
SAU	Asia	Saudi Arabia	2020-06-26	174577	3938	3469.29	1474	46	41.429	4939.83	111.43	98.167	41.708	1.302	1.172	1.02									1541814	44275	43.627	1.253	35931	1.017	0.0966	10.4	tests performed														71.3	35340680	15.322
SAU	Asia	Saudi Arabia	2020-06-27	178504	3927	3467.29	1511	37	40.143	5050.95	111.118	98.11	42.755	1.047	1.136	1.02									1587335	45521	44.915	1.288	37341	1.057	0.0929	10.8	tests performed														71.3	35340680	15.322
SAU	Asia	Saudi Arabia	2020-06-28	182493	3989	3554.43	1551	40	40.571	5163.82	112.873	100.576	43.887	1.132	1.148	1.02									1632439	45104	46.191	1.276	38982	1.103	0.0912	11	tests performed														71.3	35340680	15.322
SAU	Asia	Saudi Arabia	2020-06-29	186436	3943	3633	1599	48	41.714	5275.39	111.571	102.799	45.245	1.358	1.18	1.01									1680612	48173	47.555	1.363	41971	1.188	0.0866	11.6	tests performed														71.3	35340680	15.322
SAU	Asia	Saudi Arabia	2020-06-30	190823	4387	3811.29	1649	50	43.286	5399.53	124.135	107.844	46.66	1.415	1.225	1.01									1715785	35173	48.55	0.995	42065	1.19	0.0906	11	tests performed														71.3	35340680	15.322
SAU	Asia	Saudi Arabia	2020-07-01	194225	3402	3851.14	1698	49	44.429	5495.79	96.263	108.972	48.047	1.387	1.257	1									1768999	53214	50.056	1.506	44276	1.253	0.087	11.5	tests performed														71.3	35340680	15.322
SAU	Asia	Saudi Arabia	2020-07-02	197608	3383	3852.71	1752	54	46.286	5591.52	95.725	109.016	49.575	1.528	1.31	0.99									1812926	43927	51.299	1.243	45055	1.275	0.0855	11.7	tests performed														71.3	35340680	15.322
SAU	Asia	Saudi Arabia	2020-07-03	201801	4193	3889.14	1802	50	46.857	5710.16	118.645	110.047	50.989	1.415	1.326	0.98									1865061	52135	52.774	1.475	46178	1.307	0.0842	11.9	tests performed														71.3	35340680	15.322
SAU	Asia	Saudi Arabia	2020-07-04	205929	4128	3917.86	1858	56	49.571	5826.97	116.806	110.86	52.574	1.585	1.403	0.97									1915625	50564	54.205	1.431	46899	1.327	0.0835	12	tests performed														71.3	35340680	15.322
SAU	Asia	Saudi Arabia	2020-07-05	209509	3580	3859.43	1916	58	52.143	5928.27	101.3	109.206	54.215	1.641	1.475	0.96									1975689	60064	55.904	1.7	49036	1.388	0.0787	12.7	tests performed														71.3	35340680	15.322
SAU	Asia	Saudi Arabia	2020-07-06	213716	4207	3897.14	1968	52	52.714	6047.31	119.041	110.274	55.687	1.471	1.492	0.95									2018657	42968	57.12	1.216	48292	1.366	0.0807	12.4	tests performed														71.3	35340680	15.322
SAU	Asia	Saudi Arabia	2020-07-07	217108	3392	3755	2017	49	52.571	6143.29	95.98	106.251	57.073	1.387	1.488	0.93									2074981	56324	58.714	1.594	51314	1.452	0.0732	13.7	tests performed														71.3	35340680	15.322
SAU	Asia	Saudi Arabia	2020-07-08	220144	3036	3702.71	2059	42	51.571	6229.19	85.907	104.772	58.261	1.188	1.459	0.92									2131292	56311	60.307	1.593	51756	1.464	0.0715	14	tests performed														71.3	35340680	15.322
SAU	Asia	Saudi Arabia	2020-07-09	223327	3183	3674.14	2100	41	49.714	6319.26	90.066	103.964	59.422	1.16	1.407	0.91									2188922	57630	61.938	1.631	53714	1.52	0.0684	14.6	tests performed														71.3	35340680	15.322
SAU	Asia	Saudi Arabia	2020-07-10	226486	3159	3526.43	2151	51	49.857	6408.65	89.387	99.784	60.865	1.443	1.411	0.9									2238922	50000	63.353	1.415	53409	1.511	0.066	15.1	tests performed														71.3	35340680	15.322
SAU	Asia	Saudi Arabia	2020-07-11	229480	2994	3364.43	2181	30	46.143	6493.37	84.718	95.2	61.714	0.849	1.306	0.89									2286509	47587	64.699	1.347	52983	1.499	0.0635	15.7	tests performed														71.3	35340680	15.322
SAU	Asia	Saudi Arabia	2020-07-12	232259	2779	3250	2223	42	43.857	6572	78.635	91.962	62.902	1.188	1.241	0.88									2355822	69313	66.66	1.961	54305	1.537	0.0598	16.7	tests performed														71.3	35340680	15.322
SAU	Asia	Saudi Arabia	2020-07-13	235111	2852	3056.43	2243	20	39.286	6652.7	80.7	86.485	63.468	0.566	1.112	0.87									2399779	43957	67.904	1.244	54446	1.541	0.0561	17.8	tests performed														71.3	35340680	15.322
SAU	Asia	Saudi Arabia	2020-07-14	237803	2692	2956.43	2283	40	38	6728.87	76.173	83.655	64.6	1.132	1.075	0.87									2461947	62168	69.663	1.759	55281	1.564	0.0535	18.7	tests performed														71.3	35340680	15.322
SAU	Asia	Saudi Arabia	2020-07-15	240474	2671	2904.29	2325	42	38	6804.45	75.579	82.18	65.788	1.188	1.075	0.86									2523295	61348	71.399	1.736	56000	1.585	0.0519	19.3	tests performed														71.3	35340680	15.322
SAU	Asia	Saudi Arabia	2020-07-16	243238	2764	2844.43	2370	45	38.571	6882.66	78.21	80.486	67.062	1.273	1.091	0.86									2592002	68707	73.343	1.944	57583	1.629	0.0494	20.2	tests performed														71.3	35340680	15.322
SAU	Asia	Saudi Arabia	2020-07-17	245851	2613	2766.43	2407	37	36.571	6956.6	73.937	78.279	68.108	1.047	1.035	0.86									2657524	65522	75.197	1.854	59800	1.692	0.0463	21.6	tests performed														71.3	35340680	15.322
SAU	Asia	Saudi Arabia	2020-07-18	248416	2565	2705.14	2447	40	38	7029.18	72.579	76.545	69.24	1.132	1.075	0.85									2708822	51298	76.649	1.452	60330	1.707	0.0448	22.3	tests performed														71.3	35340680	15.322
SAU	Asia	Saudi Arabia	2020-07-19	250920	2504	2665.86	2486	39	37.571	7100.03	70.853	75.433	70.344	1.104	1.063	0.85									2769478	60656	78.365	1.716	59094	1.672	0.0451	22.2	tests performed														71.3	35340680	15.322
SAU	Asia	Saudi Arabia	2020-07-20	253349	2429	2605.43	2523	37	40	7168.76	68.731	73.723	71.391	1.047	1.132	0.85									2829086	59608	80.052	1.687	61330	1.735	0.0425	23.5	tests performed														71.3	35340680	15.322
SAU	Asia	Saudi Arabia	2020-07-21	255825	2476	2574.57	2557	34	39.143	7238.82	70.061	72.85	72.353	0.962	1.108	0.84									2884424	55338	81.618	1.566	60354	1.708	0.0427	23.4	tests performed														71.3	35340680	15.322
SAU	Asia	Saudi Arabia	2020-07-22	258156	2331	2526	2601	44	39.429	7304.78	65.958	71.476	73.598	1.245	1.116	0.84									2944954	60530	83.33	1.713	60237	1.704	0.0419	23.8	tests performed														71.3	35340680	15.322
SAU	Asia	Saudi Arabia	2020-07-23	260394	2238	2450.86	2635	34	37.857	7368.11	63.326	69.349	74.56	0.962	1.071	0.83									3000614	55660	84.905	1.575	58373	1.652	0.042	23.8	tests performed														71.3	35340680	15.322
SAU	Asia	Saudi Arabia	2020-07-24	262772	2378	2417.29	2672	37	37.857	7435.4	67.288	68.4	75.607	1.047	1.071	0.83									3056584	55970	86.489	1.584	57009	1.613	0.0424	23.6	tests performed														71.3	35340680	15.322
SAU	Asia	Saudi Arabia	2020-07-25	264973	2201	2365.29	2703	31	36.571	7497.68	62.28	66.928	76.484	0.877	1.035	0.83									3116958	60374	88.197	1.708	58305	1.65	0.0406	24.7	tests performed														71.3	35340680	15.322
SAU	Asia	Saudi Arabia	2020-07-26	266941	1968	2288.71	2733	30	35.286	7553.36	55.687	64.761	77.333	0.849	0.998	0.82									3173909	56951	89.809	1.611	57776	1.635	0.0396	25.2	tests performed														71.3	35340680	15.322
SAU	Asia	Saudi Arabia	2020-07-27	268934	1993	2226.43	2760	27	33.857	7609.76	56.394	62.999	78.097	0.764	0.958	0.81									3241204	67295	91.713	1.904	58874	1.666	0.0378	26.4	tests performed														71.3	35340680	15.322
SAU	Asia	Saudi Arabia	2020-07-28	270831	1897	2143.71	2789	29	33.143	7663.44	53.678	60.659	78.918	0.821	0.938	0.81									3307207	66003	93.581	1.868	60398	1.709	0.0355	28.2	tests performed														71.3	35340680	15.322
SAU	Asia	Saudi Arabia	2020-07-29	272590	1759	2062	2816	27	30.714	7713.21	49.773	58.346	79.682	0.764	0.869	0.8									3362326	55119	95.14	1.56	59625	1.687	0.0346	28.9	tests performed														71.3	35340680	15.322
SAU	Asia	Saudi Arabia	2020-07-30	274219	1629	1975	2842	26	29.571	7759.3	46.094	55.885	80.417	0.736	0.837	0.8									3426333	64007	96.952	1.811	60817	1.721	0.0325	30.8	tests performed														71.3	35340680	15.322
SAU	Asia	Saudi Arabia	2020-07-31	275905	1686	1876.14	2866	24	27.714	7807.01	47.707	53.087	81.096	0.679	0.784	0.8									3474638	48305	98.318	1.367	59722	1.69	0.0314	31.8	tests performed														71.3	35340680	15.322
SAU	Asia	Saudi Arabia	2020-08-01	277478	1573	1786.43	2887	21	26.286	7851.52	44.51	50.549	81.691	0.594	0.744	0.8									3514462	39824	99.445	1.127	56786	1.607	0.0315	31.8	tests performed														71.3	35340680	15.322
SAU	Asia	Saudi Arabia	2020-08-02	278835	1357	1699.14	2917	30	26.286	7889.92	38.398	48.079	82.539	0.849	0.744	0.8									3558981	44519	100.705	1.26	55010	1.557	0.0309	32.4	tests performed														71.3	35340680	15.322
SAU	Asia	Saudi Arabia	2020-08-03	280093	1258	1594.14	2949	32	27	7925.51	35.596	45.108	83.445	0.905	0.764	0.8									3616464	57483	102.331	1.627	53609	1.517	0.0297	33.6	tests performed														71.3	35340680	15.322
SAU	Asia	Saudi Arabia	2020-08-04	281456	1363	1517.86	2984	35	27.857	7964.08	38.567	42.949	84.435	0.99	0.788	0.81									3671721	55257	103.895	1.564	52073	1.473	0.0291	34.3	tests performed														71.3	35340680	15.322
SAU	Asia	Saudi Arabia	2020-08-05	282824	1368	1462	3020	36	29.143	8002.79	38.709	41.369	85.454	1.019	0.825	0.82									3730445	58724	105.557	1.662	52588	1.488	0.0278	36	tests performed														71.3	35340680	15.322
SAU	Asia	Saudi Arabia	2020-08-06	284226	1402	1429.57	3055	35	30.429	8042.46	39.671	40.451	86.444	0.99	0.861	0.83									3791902	61457	107.296	1.739	52224	1.478	0.0274	36.5	tests performed														71.3	35340680	15.322
SAU	Asia	Saudi Arabia	2020-08-07	285793	1567	1412.57	3093	38	32.429	8086.8	44.34	39.97	87.52	1.075	0.918	0.84									3855906	64004	109.107	1.811	54467	1.541	0.0259	38.6	tests performed														71.3	35340680	15.322
SAU	Asia	Saudi Arabia	2020-08-08	287262	1469	1397.71	3130	37	34.714	8128.37	41.567	39.55	88.566	1.047	0.982	0.85									3917488	61582	110.849	1.743	57575	1.629	0.0243	41.2	tests performed														71.3	35340680	15.322
SAU	Asia	Saudi Arabia	2020-08-09	288690	1428	1407.86	3167	37	35.714	8168.77	40.407	39.837	89.613	1.047	1.011	0.86									3979971	62483	112.617	1.768	60141	1.702	0.0234	42.7	tests performed														71.3	35340680	15.322
SAU	Asia	Saudi Arabia	2020-08-10	289947	1257	1407.71	3199	32	35.714	8204.34	35.568	39.833	90.519	0.905	1.011	0.87									4043957	63986	114.428	1.811	61070	1.728	0.0231	43.4	tests performed														71.3	35340680	15.322
SAU	Asia	Saudi Arabia	2020-08-11	291468	1521	1430.29	3233	34	35.571	8247.38	43.038	40.471	91.481	0.962	1.007	0.88									4114791	70834	116.432	2.004	63296	1.791	0.0226	44.3	tests performed														60.19	35340680	15.322
SAU	Asia	Saudi Arabia	2020-08-12	293037	1569	1459	3269	36	35.571	8291.78	44.396	41.284	92.5	1.019	1.007	0.88									4188703	73912	118.524	2.091	65465	1.852	0.0223	44.9	tests performed														60.19	35340680	15.322
SAU	Asia	Saudi Arabia	2020-08-13	294519	1482	1470.43	3303	34	35.429	8333.71	41.935	41.607	93.462	0.962	1.002	0.89									4258208	69505	120.49	1.967	66615	1.885	0.0221	45.3	tests performed														60.19	35340680	15.322
SAU	Asia	Saudi Arabia	2020-08-14	295902	1383	1444.14	3338	35	35	8372.84	39.133	40.863	94.452	0.99	0.99	0.89									4325238	67030	122.387	1.897	67047	1.897	0.0215	46.4	tests performed														60.19	35340680	15.322
SAU	Asia	Saudi Arabia	2020-08-15	297315	1413	1436.14	3369	31	34.143	8412.83	39.982	40.637	95.329	0.877	0.966	0.89									4388412	63174	124.175	1.788	67275	1.904	0.0213	46.8	tests performed														60.19	35340680	15.322
SAU	Asia	Saudi Arabia	2020-08-16	298542	1227	1407.43	3408	39	34.429	8447.55	34.719	39.825	96.433	1.104	0.974	0.89									4447183	58771	125.838	1.663	66745	1.889	0.0211	47.4	tests performed														60.19	35340680	15.322
SAU	Asia	Saudi Arabia	2020-08-17	299914	1372	1423.86	3436	28	33.857	8486.37	38.822	40.289	97.225	0.792	0.958	0.89									4511053	63870	127.645	1.807	66728	1.888	0.0213	46.9	tests performed														60.19	35340680	15.322
SAU	Asia	Saudi Arabia	2020-08-18	301323	1409	1407.86	3470	34	33.857	8526.24	39.869	39.837	98.187	0.962	0.958	0.89									4575278	64225	129.462	1.817	65784	1.861	0.0214	46.7	tests performed														60.19	35340680	15.322
SAU	Asia	Saudi Arabia	2020-08-19	302686	1363	1378.43	3506	36	33.857	8564.8	38.567	39.004	99.206	1.019	0.958	0.88									4640056	64778	131.295	1.833	64479	1.824	0.0214	46.8	tests performed														60.19	35340680	15.322
SAU	Asia	Saudi Arabia	2020-08-20	303973	1287	1350.57	3548	42	35	8601.22	36.417	38.216	100.394	1.188	0.99	0.88									4705627	65571	133.15	1.855	63917	1.809	0.0211	47.3	tests performed														60.19	35340680	15.322
SAU	Asia	Saudi Arabia	2020-08-21	305186	1213	1326.29	3580	32	34.571	8635.54	34.323	37.529	101.3	0.905	0.978	0.87									4767905	62278	134.913	1.762	63238	1.789	0.021	47.7	tests performed														60.19	35340680	15.322
SAU	Asia	Saudi Arabia	2020-08-22	306370	1184	1293.57	3619	39	35.714	8669.05	33.502	36.603	102.403	1.104	1.011	0.87									4823376	55471	136.482	1.57	62138	1.758	0.0208	48	tests performed														60.19	35340680	15.322
SAU	Asia	Saudi Arabia	2020-08-23	307479	1109	1276.71	3649	30	34.429	8700.43	31.38	36.126	103.252	0.849	0.974	0.86									4885069	61693	138.228	1.746	62555	1.77	0.0204	49	tests performed														60.19	35340680	15.322
SAU	Asia	Saudi Arabia	2020-08-24	308654	1175	1248.57	3691	42	36.429	8733.67	33.248	35.33	104.441	1.188	1.031	0.86									4946934	61865	139.978	1.751	62269	1.762	0.0201	49.9	tests performed														60.19	35340680	15.322
SAU	Asia	Saudi Arabia	2020-08-25	309768	1114	1206.43	3722	31	36	8765.2	31.522	34.137	105.318	0.877	1.019	0.85									5008559	61625	141.722	1.744	61897	1.751	0.0195	51.3	tests performed														60.19	35340680	15.322
SAU	Asia	Saudi Arabia	2020-08-26	310836	1068	1164.29	3755	33	35.571	8795.42	30.22	32.945	106.251	0.934	1.007	0.85									5074982	66423	143.602	1.88	62132	1.758	0.0187	53.4	tests performed														60.19	35340680	15.322
SAU	Asia	Saudi Arabia	2020-08-27	311855	1019	1126	3785	30	33.857	8824.25	28.834	31.861	107.1	0.849	0.958	0.85									5138335	63353	145.394	1.793	61815	1.749	0.0182	54.9	tests performed														60.19	35340680	15.322
SAU	Asia	Saudi Arabia	2020-08-28	312924	1069	1105.43	3813	28	33.286	8854.5	30.248	31.279	107.893	0.792	0.942	0.84									5193501	55166	146.955	1.561	60799	1.72	0.0182	55	tests performed														60.19	35340680	15.322
SAU	Asia	Saudi Arabia	2020-08-29	313911	987	1077.29	3840	27	31.571	8882.43	27.928	30.483	108.657	0.764	0.893	0.84									5234125	40624	148.105	1.149	58678	1.66	0.0184	54.5	tests performed														60.19	35340680	15.322
SAU	Asia	Saudi Arabia	2020-08-30	314821	910	1048.86	3870	30	31.571	8908.18	25.749	29.678	109.506	0.849	0.893	0.84									5284219	50094	149.522	1.417	57021	1.613	0.0184	54.4	tests performed														60.19	35340680	15.322
SAU	Asia	Saudi Arabia	2020-08-31	315772	951	1016.86	3897	27	29.429	8935.09	26.909	28.773	110.27	0.764	0.833	0.83									5337366	53147	151.026	1.504	55776	1.578	0.0182	54.9	tests performed														60.19	35340680	15.322
SAU	Asia	Saudi Arabia	2020-09-01	316670	898	986	3929	32	29.571	8960.5	25.41	27.9	111.175	0.905	0.837	0.83									5393167	55801	152.605	1.579	54944	1.555	0.0179	55.7	tests performed														60.19	35340680	15.322
SAU	Asia	Saudi Arabia	2020-09-02	317486	816	950	3956	27	28.714	8983.58	23.09	26.881	111.939	0.764	0.812	0.82									5444978	51811	154.071	1.466	52857	1.496	0.018	55.6	tests performed														60.19	35340680	15.322
SAU	Asia	Saudi Arabia	2020-09-03	318319	833	923.429	3982	26	28.143	9007.16	23.571	26.129	112.675	0.736	0.796	0.82									5500783	55805	155.65	1.579	51778	1.465	0.0178	56.1	tests performed														60.19	35340680	15.322
SAU	Asia	Saudi Arabia	2020-09-04	319141	822	888.143	4015	33	28.857	9030.42	23.259	25.131	113.608	0.934	0.817	0.82									5553951	53168	157.155	1.504	51493	1.457	0.0172	58	tests performed														60.19	35340680	15.322
SAU	Asia	Saudi Arabia	2020-09-05	319932	791	860.143	4049	34	29.857	9052.8	22.382	24.339	114.571	0.962	0.845	0.82									5598774	44823	158.423	1.268	52093	1.474	0.0165	60.6	tests performed														60.19	35340680	15.322
SAU	Asia	Saudi Arabia	2020-09-06	320688	756	838.143	4081	32	30.143	9074.19	21.392	23.716	115.476	0.905	0.853	0.83									5646103	47329	159.762	1.339	51698	1.463	0.0162	61.7	tests performed														60.19	35340680	15.322
SAU	Asia	Saudi Arabia	2020-09-07	321456	768	812	4107	26	30	9095.92	21.731	22.976	116.212	0.736	0.849	0.82									5697951	51848	161.229	1.467	51512	1.458	0.0158	63.4	tests performed														60.19	35340680	15.322
SAU	Asia	Saudi Arabia	2020-09-08	322237	781	795.286	4137	30	29.714	9118.02	22.099	22.503	117.061	0.849	0.841	0.82									5750314	52363	162.711	1.482	51021	1.444	0.0156	64.2	tests performed														60.19	35340680	15.322
SAU	Asia	Saudi Arabia	2020-09-09	323012	775	789.429	4165	28	29.857	9139.95	21.929	22.338	117.853	0.792	0.845	0.82									5794763	44449	163.969	1.258	49969	1.414	0.0158	63.3	tests performed														60.19	35340680	15.322
SAU	Asia	Saudi Arabia	2020-09-10	323720	708	771.571	4189	24	29.571	9159.98	20.034	21.832	118.532	0.679	0.837	0.82									5853505	58742	165.631	1.662	50389	1.426	0.0153	65.3	tests performed														60.19	35340680	15.322
SAU	Asia	Saudi Arabia	2020-09-11	324407	687	752.286	4213	24	28.286	9179.42	19.439	21.287	119.211	0.679	0.8	0.82									5897841	44336	166.885	1.255	49127	1.39	0.0153	65.3	tests performed														60.19	35340680	15.322
SAU	Asia	Saudi Arabia	2020-09-12	325050	643	731.143	4240	27	27.286	9197.62	18.194	20.688	119.975	0.764	0.772	0.82									5937221	39380	168	1.114	48350	1.368	0.0151	66.1	tests performed														60.19	35340680	15.322
SAU	Asia	Saudi Arabia	2020-09-13	325651	601	709	4268	28	26.714	9214.62	17.006	20.062	120.767	0.792	0.756	0.82									5984404	47183	169.335	1.335	48329	1.368	0.0147	68.2	tests performed														60.19	35340680	15.322
SAU	Asia	Saudi Arabia	2020-09-14	326258	607	686	4305	37	28.286	9231.8	17.176	19.411	121.814	1.047	0.8	0.82									6039015	54611	170.88	1.545	48723	1.379	0.0141	71	tests performed														60.19	35340680	15.322
SAU	Asia	Saudi Arabia	2020-09-15	326930	672	670.429	4338	33	28.714	9250.81	19.015	18.97	122.748	0.934	0.812	0.82									6092367	53352	172.39	1.51	48865	1.383	0.0137	72.9	tests performed														57.41	35340680	15.322
SAU	Asia	Saudi Arabia	2020-09-16	327551	621	648.429	4369	31	29.143	9268.38	17.572	18.348	123.625	0.877	0.825	0.82									6144560	52193	173.866	1.477	49971	1.414	0.013	77.1	tests performed														57.41	35340680	15.322
SAU	Asia	Saudi Arabia	2020-09-17	328144	593	632	4399	30	30	9285.16	16.78	17.883	124.474	0.849	0.849	0.83									6197418	52858	175.362	1.496	49130	1.39	0.0129	77.7	tests performed														57.41	35340680	15.322
SAU	Asia	Saudi Arabia	2020-09-18	328720	576	616.143	4430	31	31	9301.46	16.298	17.434	125.351	0.877	0.877	0.83									6243608	46190	176.669	1.307	49395	1.398	0.0125	80.2	tests performed														57.41	35340680	15.322
SAU	Asia	Saudi Arabia	2020-09-19	329271	551	603	4458	28	31.143	9317.05	15.591	17.062	126.144	0.792	0.881	0.83									6286799	43191	177.891	1.222	49940	1.413	0.0121	82.8	tests performed														57.41	35340680	15.322
SAU	Asia	Saudi Arabia	2020-09-20	329754	483	586.143	4485	27	31	9330.72	13.667	16.586	126.908	0.764	0.877	0.83									6333609	46810	179.216	1.325	49886	1.412	0.0117	85.1	tests performed														57.41	35340680	15.322
SAU	Asia	Saudi Arabia	2020-09-21	330246	492	569.714	4512	27	29.571	9344.64	13.922	16.121	127.672	0.764	0.837	0.83									6385134	51525	180.674	1.458	49446	1.399	0.0115	86.8	tests performed														57.41	35340680	15.322
SAU	Asia	Saudi Arabia	2020-09-22	330798	552	552.571	4542	30	29.143	9360.26	15.619	15.636	128.52	0.849	0.825	0.84									6433988	48854	182.056	1.382	48803	1.381	0.0113	88.3	tests performed														57.41	35340680	15.322
SAU	Asia	Saudi Arabia	2020-09-23	331359	561	544	4569	27	28.571	9376.14	15.874	15.393	129.284	0.764	0.808	0.84									6480025	46037	183.359	1.303	47924	1.356	0.0114	88.1	tests performed														57.41	35340680	15.322
SAU	Asia	Saudi Arabia	2020-09-24	331857	498	530.429	4599	30	28.571	9390.23	14.091	15.009	130.133	0.849	0.808	0.84									6518723	38698	184.454	1.095	45901	1.299	0.0116	86.5	tests performed														57.41	35340680	15.322
SAU	Asia	Saudi Arabia	2020-09-25	332329	472	515.571	4625	26	27.857	9403.58	13.356	14.589	130.869	0.736	0.788	0.85									6557251	38528	185.544	1.09	44806	1.268	0.0115	86.9	tests performed														57.41	35340680	15.322
SAU	Asia	Saudi Arabia	2020-09-26	332790	461	502.714	4655	30	28.143	9416.63	13.044	14.225	131.718	0.849	0.796	0.85									6591551	34300	186.515	0.971	43536	1.232	0.0115	86.6	tests performed														57.41	35340680	15.322
SAU	Asia	Saudi Arabia	2020-09-27	333193	403	491.286	4683	28	28.286	9428.03	11.403	13.901	132.51	0.792	0.8	0.86									6635663	44112	187.763	1.248	43151	1.221	0.0114	87.8	tests performed														57.41	35340680	15.322
SAU	Asia	Saudi Arabia	2020-09-28	333648	455	486	4712	29	28.571	9440.91	12.875	13.752	133.331	0.821	0.808	0.86									6687339	51676	189.225	1.462	43172	1.222	0.0113	88.8	tests performed														57.41	35340680	15.322
SAU	Asia	Saudi Arabia	2020-09-29	334187	539	484.143	4739	27	28.143	9456.16	15.252	13.699	134.095	0.764	0.796	0.87									6734659	47320	190.564	1.339	42953	1.215	0.0113	88.7	tests performed														57.41	35340680	15.322
SAU	Asia	Saudi Arabia	2020-09-30	334605	418	463.714	4768	29	28.429	9467.98	11.828	13.121	134.915	0.821	0.804	0.87									6784194	49535	191.966	1.402	43453	1.23	0.0107	93.7	tests performed														57.41	35340680	15.322
SAU	Asia	Saudi Arabia	2020-10-01	335097	492	462.857	4794	26	27.857	9481.91	13.922	13.097	135.651	0.736	0.788	0.88									6835826	51632	193.427	1.461	45300	1.282	0.0102	97.9	tests performed														57.41	35340680	15.322
SAU	Asia	Saudi Arabia	2020-10-02	335578	481	464.143	4823	29	28.286	9495.52	13.61	13.133	136.472	0.821	0.8	0.89									6881845	46019	194.729	1.302	46371	1.312	0.01	99.9	tests performed														57.41	35340680	15.322
SAU	Asia	Saudi Arabia	2020-10-03	335997	419	458.143	4850	27	27.857	9507.37	11.856	12.964	137.236	0.764	0.788	0.89									6921185	39340	195.842	1.113	47091	1.332	0.0097	102.8	tests performed														57.41	35340680	15.322
SAU	Asia	Saudi Arabia	2020-10-04	336387	390	456.286	4875	25	27.429	9518.41	11.035	12.911	137.943	0.707	0.776	0.89									6968314	47129	197.175	1.334	47522	1.345	0.0096	104.1	tests performed														57.41	35340680	15.322
SAU	Asia	Saudi Arabia	2020-10-05	336766	379	445.429	4898	23	26.571	9529.13	10.724	12.604	138.594	0.651	0.752	0.9									7019099	50785	198.612	1.437	47394	1.341	0.0094	106.4	tests performed														57.41	35340680	15.322
SAU	Asia	Saudi Arabia	2020-10-06	337243	477	436.571	4923	25	26.286	9542.63	13.497	12.353	139.301	0.707	0.744	0.9									7071283	52184	200.089	1.477	48089	1.361	0.0091	110.2	tests performed														57.41	35340680	15.322
SAU	Asia	Saudi Arabia	2020-10-07	337711	468	443.714	4947	24	25.571	9555.87	13.243	12.555	139.98	0.679	0.724	0.91									7119624	48341	201.457	1.368	47919	1.356	0.0093	108	tests performed														57.41	35340680	15.322
SAU	Asia	Saudi Arabia	2020-10-08	338132	421	433.571	4972	25	25.429	9567.78	11.913	12.268	140.688	0.707	0.72	0.91									7173518	53894	202.982	1.525	48242	1.365	0.009	111.3	tests performed														57.41	35340680	15.322
SAU	Asia	Saudi Arabia	2020-10-09	338539	407	423	4996	24	24.714	9579.3	11.516	11.969	141.367	0.679	0.699	0.91									7219707	46189	204.289	1.307	48266	1.366	0.0088	114.1	tests performed														57.41	35340680	15.322
SAU	Asia	Saudi Arabia	2020-10-10	338944	405	421	5018	22	24	9590.76	11.46	11.913	141.989	0.623	0.679	0.92									7257946	38239	205.371	1.082	48109	1.361	0.0088	114.3	tests performed														57.41	35340680	15.322
SAU	Asia	Saudi Arabia	2020-10-11	339267	323	411.429	5043	25	24	9599.9	9.14	11.642	142.697	0.707	0.679	0.93									7303649	45703	206.664	1.293	47905	1.356	0.0086	116.4	tests performed														57.41	35340680	15.322
SAU	Asia	Saudi Arabia	2020-10-12	339615	348	407	5068	25	24.286	9609.75	9.847	11.516	143.404	0.707	0.687	0.93									7353144	49495	208.065	1.401	47721	1.35	0.0085	117.3	tests performed														57.41	35340680	15.322
SAU	Asia	Saudi Arabia	2020-10-13	340089	474	406.571	5087	19	23.429	9623.16	13.412	11.504	143.942	0.538	0.663	0.94									7404993	51849	209.532	1.467	47673	1.349	0.0085	117.3	tests performed														57.41	35340680	15.322
SAU	Asia	Saudi Arabia	2020-10-14	340590	501	411.286	5108	21	23	9637.34	14.176	11.638	144.536	0.594	0.651	0.95									7457959	52966	211.03	1.499	48334	1.368	0.0085	117.5	tests performed														57.41	35340680	15.322
SAU	Asia	Saudi Arabia	2020-10-15	341062	472	418.571	5127	19	22.143	9650.69	13.356	11.844	145.074	0.538	0.627	0.95									7510991	53032	212.531	1.501	48210	1.364	0.0087	115.2	tests performed														57.41	35340680	15.322
SAU	Asia	Saudi Arabia	2020-10-16	341495	433	422.286	5144	17	21.143	9662.94	12.252	11.949	145.555	0.481	0.598	0.95									7558917	47926	213.887	1.356	48459	1.371	0.0087	114.8	tests performed														57.41	35340680	15.322
SAU	Asia	Saudi Arabia	2020-10-17	341854	359	415.714	5165	21	21	9673.1	10.158	11.763	146.149	0.594	0.594	0.95									7597302	38385	214.973	1.086	48479	1.372	0.0086	116.6	tests performed														57.41	35340680	15.322
SAU	Asia	Saudi Arabia	2020-10-18	342202	348	419.286	5185	20	20.286	9682.95	9.847	11.864	146.715	0.566	0.574	0.95									7646186	48884	216.357	1.383	48934	1.385	0.0086	116.7	tests performed														57.41	35340680	15.322
SAU	Asia	Saudi Arabia	2020-10-19	342583	381	424	5201	16	19	9693.73	10.781	11.998	147.168	0.453	0.538	0.95									7700663	54477	217.898	1.541	49646	1.405	0.0085	117.1	tests performed														57.41	35340680	15.322
SAU	Asia	Saudi Arabia	2020-10-20	342968	385	411.286	5217	16	18.571	9704.62	10.894	11.638	147.62	0.453	0.525	0.95									7752306	51643	219.359	1.461	49616	1.404	0.0083	120.6	tests performed														57.41	35340680	15.322
SAU	Asia	Saudi Arabia	2020-10-21	343373	405	397.571	5235	18	18.143	9716.08	11.46	11.25	148.13	0.509	0.513	0.95									7805829	53523	220.874	1.514	49696	1.406	0.008	125	tests performed														57.41	35340680	15.322
SAU	Asia	Saudi Arabia	2020-10-22	343774	401	387.429	5250	15	17.571	9727.43	11.347	10.963	148.554	0.424	0.497	0.96									7858705	52876	222.37	1.496	49673	1.406	0.0078	128.2	tests performed														57.41	35340680	15.322
SAU	Asia	Saudi Arabia	2020-10-23	344157	383	380.286	5264	14	17.143	9738.27	10.837	10.761	148.95	0.396	0.485	0.96									7913514	54809	223.921	1.551	50657	1.433	0.0075	133.2	tests performed														57.41	35340680	15.322
SAU	Asia	Saudi Arabia	2020-10-24	344552	395	385.429	5281	17	16.571	9749.44	11.177	10.906	149.431	0.481	0.469	0.96									7963528	50014	225.336	1.415	52318	1.48	0.0074	135.7	tests performed														57.41	35340680	15.322
SAU	Asia	Saudi Arabia	2020-10-25	344875	323	381.857	5296	15	15.857	9758.58	9.14	10.805	149.856	0.424	0.449	0.97									8015849	52321	226.816	1.48	52809	1.494	0.0072	138.3	tests performed														57.41	35340680	15.322
SAU	Asia	Saudi Arabia	2020-10-26	345232	357	378.429	5313	17	16	9768.69	10.102	10.708	150.337	0.481	0.453	0.97									8073719	57870	228.454	1.637	53294	1.508	0.0071	140.8	tests performed														57.41	35340680	15.322
SAU	Asia	Saudi Arabia	2020-10-27	345631	399	380.429	5329	16	16	9779.98	11.29	10.765	150.789	0.453	0.453	0.98									8132280	58561	230.111	1.657	54282	1.536	0.007	142.7	tests performed														57.41	35340680	15.322
SAU	Asia	Saudi Arabia	2020-10-28	346047	416	382	5348	19	16.143	9791.75	11.771	10.809	151.327	0.538	0.457	0.98									8188187	55907	231.693	1.582	54623	1.546	0.007	143	tests performed														57.41	35340680	15.322
SAU	Asia	Saudi Arabia	2020-10-29	346482	435	386.857	5363	15	16.143	9804.06	12.309	10.947	151.751	0.424	0.457	0.99									8244442	56255	233.285	1.592	55105	1.559	0.007	142.4	tests performed														57.41	35340680	15.322
SAU	Asia	Saudi Arabia	2020-10-30	346880	398	389	5383	20	17	9815.32	11.262	11.007	152.317	0.566	0.481	0.99									8295860	51418	234.74	1.455	54621	1.546	0.0071	140.4	tests performed														53.7	35340680	15.322
SAU	Asia	Saudi Arabia	2020-10-31	347282	402	390	5402	19	17.286	9826.69	11.375	11.035	152.855	0.538	0.489	1									8340700	44840	236.008	1.269	53882	1.525	0.0072	138.2	tests performed														53.7	35340680	15.322
SAU	Asia	Saudi Arabia	2020-11-01	347656	374	397.286	5420	18	17.714	9837.27	10.583	11.242	153.364	0.509	0.501	1									8394519	53819	237.531	1.523	54096	1.531	0.0073	136.2	tests performed														53.7	35340680	15.322
SAU	Asia	Saudi Arabia	2020-11-02	348037	381	400.714	5437	17	17.714	9848.06	10.781	11.339	153.845	0.481	0.501	1									8453449	58930	239.199	1.667	54247	1.535	0.0074	135.4	tests performed														53.7	35340680	15.322
SAU	Asia	Saudi Arabia	2020-11-03	348510	473	411.286	5456	19	18.143	9861.44	13.384	11.638	154.383	0.538	0.513	1									8517113	63664	241	1.801	54976	1.556	0.0075	133.7	tests performed														53.7	35340680	15.322
SAU	Asia	Saudi Arabia	2020-11-04	348936	426	412.714	5471	15	17.571	9873.49	12.054	11.678	154.807	0.424	0.497	1									8576430	59317	242.679	1.678	55463	1.569	0.0074	134.4	tests performed														53.7	35340680	15.322
SAU	Asia	Saudi Arabia	2020-11-05	349386	450	414.857	5489	18	18	9886.23	12.733	11.739	155.317	0.509	0.509	0.99									8638296	61866	244.429	1.751	56265	1.592	0.0074	135.6	tests performed														53.7	35340680	15.322
SAU	Asia	Saudi Arabia	2020-11-06	349822	436	420.286	5506	17	17.571	9898.56	12.337	11.892	155.798	0.481	0.497	0.99									8692022	53726	245.949	1.52	56595	1.601	0.0074	134.7	tests performed														53.7	35340680	15.322
SAU	Asia	Saudi Arabia	2020-11-07	350229	407	421	5525	19	17.571	9910.08	11.516	11.913	156.335	0.538	0.497	0.98									8737493	45471	247.236	1.287	56685	1.604	0.0074	134.6	tests performed														53.7	35340680	15.322
SAU	Asia	Saudi Arabia	2020-11-08	350592	363	419.429	5540	15	17.143	9920.35	10.271	11.868	156.76	0.424	0.485	0.97									8791076	53583	248.752	1.516	56651	1.603	0.0074	135.1	tests performed														53.7	35340680	15.322
SAU	Asia	Saudi Arabia	2020-11-09	350984	392	421	5559	19	17.429	9931.44	11.092	11.913	157.297	0.538	0.493	0.96									8855666	64590	250.58	1.828	57460	1.626	0.0073	136.5	tests performed														53.7	35340680	15.322
SAU	Asia	Saudi Arabia	2020-11-10	351455	471	420.714	5576	17	17.143	9944.77	13.327	11.905	157.779	0.481	0.485	0.95									8918588	62922	252.36	1.78	57354	1.623	0.0073	136.3	tests performed														53.7	35340680	15.322
SAU	Asia	Saudi Arabia	2020-11-11	351849	394	416.143	5590	14	17	9955.92	11.149	11.775	158.175	0.396	0.481	0.94									8969439	50851	253.799	1.439	56144	1.589	0.0074	134.9	tests performed														53.7	35340680	15.322
SAU	Asia	Saudi Arabia	2020-11-12	352160	311	396.286	5605	15	16.571	9964.72	8.8	11.213	158.599	0.424	0.469	0.93									9032050	62611	255.571	1.772	56251	1.592	0.007	141.9	tests performed														53.7	35340680	15.322
SAU	Asia	Saudi Arabia	2020-11-13	352601	441	397	5625	20	17	9977.2	12.479	11.234	159.165	0.566	0.481	0.92									9083189	51139	257.018	1.447	55881	1.581	0.0071	140.8	tests performed														53.7	35340680	15.322
SAU	Asia	Saudi Arabia	2020-11-14	352950	349	388.714	5641	16	16.571	9987.07	9.875	10.999	159.618	0.453	0.469	0.91									9128044	44855	258.287	1.269	55793	1.579	0.007	143.5	tests performed														53.7	35340680	15.322
SAU	Asia	Saudi Arabia	2020-11-15	353255	305	380.429	5657	16	16.714	9995.7	8.63	10.765	160.07	0.453	0.473	0.9									9181191	53147	259.791	1.504	55731	1.577	0.0068	146.5	tests performed														53.7	35340680	15.322
SAU	Asia	Saudi Arabia	2020-11-16	353556	301	367.429	5676	19	16.714	10004.2	8.517	10.397	160.608	0.538	0.473	0.89									9240983	59792	261.483	1.692	55045	1.558	0.0067	149.8	tests performed														53.7	35340680	15.322
SAU	Asia	Saudi Arabia	2020-11-17	353918	362	351.857	5692	16	16.571	10014.5	10.243	9.956	161.061	0.453	0.469	0.88									9297674	56691	263.087	1.604	54155	1.532	0.0065	153.9	tests performed														53.7	35340680	15.322
SAU	Asia	Saudi Arabia	2020-11-18	354208	290	337	5710	18	17.143	10022.7	8.206	9.536	161.57	0.509	0.485	0.87									9356933	59259	264.764	1.677	55356	1.566	0.0061	164.3	tests performed														53.7	35340680	15.322
SAU	Asia	Saudi Arabia	2020-11-19	354527	319	338.143	5729	19	17.714	10031.7	9.026	9.568	162.108	0.538	0.501	0.86									9414367	57434	266.389	1.625	54617	1.545	0.0062	161.5	tests performed														53.7	35340680	15.322
SAU	Asia	Saudi Arabia	2020-11-20	354813	286	316	5745	16	17.143	10039.8	8.093	8.942	162.561	0.453	0.485	0.85									9461812	47445	267.731	1.343	54089	1.531	0.0058	171.2	tests performed														53.7	35340680	15.322
SAU	Asia	Saudi Arabia	2020-11-21	355034	221	297.714	5761	16	17.143	10046	6.253	8.424	163.013	0.453	0.485	0.85									9498370	36558	268.766	1.034	52904	1.497	0.0056	177.7	tests performed														53.7	35340680	15.322
SAU	Asia	Saudi Arabia	2020-11-22	355258	224	286.143	5780	19	17.571	10052.4	6.338	8.097	163.551	0.538	0.497	0.85									9538765	40395	269.909	1.143	51082	1.445	0.0056	178.5	tests performed														53.7	35340680	15.322
SAU	Asia	Saudi Arabia	2020-11-23	355489	231	276.143	5796	16	17.143	10058.9	6.536	7.814	164.004	0.453	0.485	0.86									9594041	55276	271.473	1.564	50437	1.427	0.0055	182.6	tests performed														53.7	35340680	15.322
SAU	Asia	Saudi Arabia	2020-11-24	355741	252	260.429	5811	15	17	10066	7.131	7.369	164.428	0.424	0.481	0.86									9644779	50738	272.909	1.436	49586	1.403	0.0053	190.4	tests performed														53.7	35340680	15.322
SAU	Asia	Saudi Arabia	2020-11-25	356067	326	265.571	5825	14	16.429	10075.3	9.224	7.515	164.824	0.396	0.465	0.87									9696610	51831	274.375	1.467	48525	1.373	0.0055	182.7	tests performed														53.7	35340680	15.322
SAU	Asia	Saudi Arabia	2020-11-26	356389	322	266	5840	15	15.857	10084.4	9.111	7.527	165.249	0.424	0.449	0.87									9748559	51949	275.845	1.47	47742	1.351	0.0056	179.5	tests performed														53.7	35340680	15.322
SAU	Asia	Saudi Arabia	2020-11-27	356691	302	268.286	5857	17	16	10092.9	8.545	7.591	165.73	0.481	0.453	0.87									9785268	36709	276.884	1.039	46208	1.308	0.0058	172.2	tests performed														53.7	35340680	15.322
SAU	Asia	Saudi Arabia	2020-11-28	356911	220	268.143	5870	13	15.571	10099.2	6.225	7.587	166.098	0.368	0.441	0.86									9819884	34616	277.863	0.979	45931	1.3	0.0058	171.3	tests performed														53.7	35340680	15.322
SAU	Asia	Saudi Arabia	2020-11-29	357128	217	267.143	5884	14	14.857	10105.3	6.14	7.559	166.494	0.396	0.42	0.86									9859108	39224	278.973	1.11	45763	1.295	0.0058	171.3	tests performed														53.7	35340680	15.322
SAU	Asia	Saudi Arabia	2020-11-30	357360	232	267.286	5896	12	14.286	10111.9	6.565	7.563	166.833	0.34	0.404	0.86									9905480	46372	280.285	1.312	44491	1.259	0.006	166.5	tests performed														53.7	35340680	15.322
SAU	Asia	Saudi Arabia	2020-12-01	357623	263	268.857	5907	11	13.714	10119.3	7.442	7.608	167.144	0.311	0.388	0.85									9952817	47337	281.625	1.339	44005	1.245	0.0061	163.7	tests performed														53.7	35340680	15.322
SAU	Asia	Saudi Arabia	2020-12-02	357872	249	257.857	5919	12	13.429	10126.3	7.046	7.296	167.484	0.34	0.38	0.85									9994942	42125	282.817	1.192	42619	1.206	0.0061	165.3	tests performed														53.7	35340680	15.322
SAU	Asia	Saudi Arabia	2020-12-03	358102	230	244.714	5930	11	12.857	10132.9	6.508	6.924	167.795	0.311	0.364	0.84									10039248	44306	284.071	1.254	41527	1.175	0.0059	169.7	tests performed														53.7	35340680	15.322
SAU	Asia	Saudi Arabia	2020-12-04	358336	234	235	5940	10	11.857	10139.5	6.621	6.65	168.078	0.283	0.336	0.84									10073869	34621	285.05	0.98	41229	1.167	0.0057	175.4	tests performed														53.7	35340680	15.322
SAU	Asia	Saudi Arabia	2020-12-05	358526	190	230.714	5954	14	12	10144.9	5.376	6.528	168.474	0.396	0.34	0.84									10106659	32790	285.978	0.928	40968	1.159	0.0056	177.6	tests performed														53.7	35340680	15.322
SAU	Asia	Saudi Arabia	2020-12-06	358713	187	226.429	5965	11	11.571	10150.1	5.291	6.407	168.786	0.311	0.327	0.83									10147030	40371	287.12	1.142	41132	1.164	0.0055	181.7	tests performed														53.7	35340680	15.322
SAU	Asia	Saudi Arabia	2020-12-07	358922	209	223.143	5977	12	11.571	10156.1	5.914	6.314	169.125	0.34	0.327	0.83									10191631	44601	288.382	1.262	40879	1.157	0.0055	183.2	tests performed														53.7	35340680	15.322
SAU	Asia	Saudi Arabia	2020-12-08	359115	193	213.143	5989	12	11.714	10161.5	5.461	6.031	169.465	0.34	0.331	0.82									10233590	41959	289.57	1.187	40110	1.135	0.0053	188.2	tests performed														53.7	35340680	15.322
SAU	Asia	Saudi Arabia	2020-12-09	359274	159	200.286	6002	13	11.857	10166	4.499	5.667	169.833	0.368	0.336	0.82									10275365	41775	290.752	1.182	40060	1.134	0.005	200	tests performed														53.7	35340680	15.322
SAU	Asia	Saudi Arabia	2020-12-10	359415	141	187.571	6012	10	11.714	10170	3.99	5.308	170.116	0.283	0.331	0.82									10316632	41267	291.919	1.168	39626	1.121	0.0047	211.3	tests performed														53.7	35340680	15.322
SAU	Asia	Saudi Arabia	2020-12-11	359583	168	178.143	6023	11	11.857	10174.8	4.754	5.041	170.427	0.311	0.336	0.82									10349590	32958	292.852	0.933	39389	1.115	0.0045	221.1	tests performed														53.7	35340680	15.322
SAU	Asia	Saudi Arabia	2020-12-12	359749	166	174.714	6036	13	11.714	10179.5	4.697	4.944	170.795	0.368	0.331	0.83									10378732	29142	293.677	0.825	38868	1.1	0.0045	222.5	tests performed														53.7	35340680	15.322
SAU	Asia	Saudi Arabia	2020-12-13	359888	139	167.857	6048	12	11.857	10183.4	3.933	4.75	171.134	0.34	0.336	0.84									10409634	30902	294.551	0.874	37515	1.062	0.0045	223.5	tests performed														53.7	35340680	15.322
SAU	Asia	Saudi Arabia	2020-12-14	360013	125	155.857	6059	11	11.714	10186.9	3.537	4.41	171.445	0.311	0.331	0.85									10444186	34552	295.529	0.978	36079	1.021	0.0043	231.5	tests performed														53.7	35340680	15.322
SAU	Asia	Saudi Arabia	2020-12-15	360155	142	148.571	6069	10	11.429	10190.9	4.018	4.204	171.728	0.283	0.323	0.86									10490805	46619	296.848	1.319	36745	1.04	0.004	247.3	tests performed														53.7	35340680	15.322
SAU	Asia	Saudi Arabia	2020-12-16	360335	180	151.571	6080	11	11.143	10196	5.093	4.289	172.04	0.311	0.315	0.88									10530246	39441	297.964	1.116	36412	1.03	0.0042	240.2	tests performed														53.7	35340680	15.322
SAU	Asia	Saudi Arabia	2020-12-17	360516	181	157.286	6091	11	11.286	10201.2	5.122	4.451	172.351	0.311	0.319	0.89									10572694	42448	299.165	1.201	36580	1.035	0.0043	232.6	tests performed														53.7	35340680	15.322
SAU	Asia	Saudi Arabia	2020-12-18	360690	174	158.143	6101	10	11.143	10206.1	4.924	4.475	172.634	0.283	0.315	0.9									10606370	33676	300.118	0.953	36683	1.038	0.0043	232	tests performed														53.7	35340680	15.322
SAU	Asia	Saudi Arabia	2020-12-19	360848	158	157	6112	11	10.857	10210.6	4.471	4.442	172.945	0.311	0.307	0.91									10639645	33275	301.059	0.942	37273	1.055	0.0042	237.4	tests performed														53.7	35340680	15.322
SAU	Asia	Saudi Arabia	2020-12-20	361010	162	160.286	6122	10	10.571	10215.1	4.584	4.535	173.228	0.283	0.299	0.92									10676018	36373	302.089	1.029	38055	1.077	0.0042	237.4	tests performed														56.48	35340680	15.322
SAU	Asia	Saudi Arabia	2020-12-21	361178	168	166.429	6131	9	10.286	10219.9	4.754	4.709	173.483	0.255	0.291	0.93									10715628	39610	303.209	1.121	38777	1.097	0.0043	233	tests performed														56.48	35340680	15.322
SAU	Asia	Saudi Arabia	2020-12-22	361359	181	172	6139	8	10	10225	5.122	4.867	173.709	0.226	0.283	0.93									10755192	39564	304.329	1.12	37770	1.069	0.0046	219.6	tests performed														56.48	35340680	15.322
SAU	Asia	Saudi Arabia	2020-12-23	361536	177	171.571	6148	9	9.714	10230	5.008	4.855	173.964	0.255	0.275	0.93									10789890	34698	305.311	0.982	37092	1.05	0.0046	216.2	tests performed														56.48	35340680	15.322
SAU	Asia	Saudi Arabia	2020-12-24	361725	189	172.714	6159	11	9.714	10235.4	5.348	4.887	174.275	0.311	0.275	0.92									10822229	32339	306.226	0.915	35648	1.009	0.0048	206.4	tests performed														56.48	35340680	15.322
SAU	Asia	Saudi Arabia	2020-12-25	361903	178	173.286	6168	9	9.571	10240.4	5.037	4.903	174.53	0.255	0.271	0.92									10851145	28916	307.044	0.818	34968	0.989	0.005	201.8	tests performed														56.48	35340680	15.322
SAU	Asia	Saudi Arabia	2020-12-26	362066	163	174	6176	8	9.143	10245	4.612	4.924	174.756	0.226	0.259	0.91									10872920	21775	307.66	0.616	33325	0.943	0.0052	191.5	tests performed														56.48	35340680	15.322
SAU	Asia	Saudi Arabia	2020-12-27	362220	154	172.857	6185	9	9	10249.4	4.358	4.891	175.011	0.255	0.255	0.9									10903029	30109	308.512	0.852	32430	0.918	0.0053	187.6	tests performed														56.48	35340680	15.322
SAU	Asia	Saudi Arabia	2020-12-28	362339	119	165.857	6196	11	9.286	10252.7	3.367	4.693	175.322	0.311	0.263	0.89									10937706	34677	309.493	0.981	31725	0.898	0.0052	191.3	tests performed														56.48	35340680	15.322
SAU	Asia	Saudi Arabia	2020-12-29	362488	149	161.286	6204	8	9.286	10257	4.216	4.564	175.548	0.226	0.263	0.88									10973855	36149	310.516	1.023	31238	0.884	0.0052	193.7	tests performed														56.48	35340680	15.322
SAU	Asia	Saudi Arabia	2020-12-30	362601	113	152.143	6214	10	9.429	10260.2	3.197	4.305	175.831	0.283	0.267	0.87									11010384	36529	311.55	1.034	31499	0.891	0.0048	207	tests performed														56.48	35340680	15.322
SAU	Asia	Saudi Arabia	2020-12-31	362741	140	145.143	6223	9	9.143	10264.1	3.961	4.107	176.086	0.255	0.259	0.87									11046767	36383	312.579	1.029	32077	0.908	0.0045	221	tests performed														56.48	35340680	15.322
SAU	Asia	Saudi Arabia	2021-01-01	362878	137	139.286	6230	7	8.857	10268	3.877	3.941	176.284	0.198	0.251	0.87									11073936	27169	313.348	0.769	31827	0.901	0.0044	228.5	tests performed														56.48	35340680	15.322
SAU	Asia	Saudi Arabia	2021-01-02	362979	101	130.429	6239	9	9	10270.9	2.858	3.691	176.539	0.255	0.255	0.88									11103188	29252	314.176	0.828	32895	0.931	0.004	252.2	tests performed														56.48	35340680	15.322
SAU	Asia	Saudi Arabia	2021-01-03	363061	82	120.143	6246	7	8.714	10273.2	2.32	3.4	176.737	0.198	0.247	0.88									11134877	31689	315.073	0.897	33121	0.937	0.0036	275.7	tests performed														56.48	35340680	15.322
SAU	Asia	Saudi Arabia	2021-01-04	363155	94	116.571	6256	10	8.571	10275.8	2.66	3.299	177.02	0.283	0.243	0.89									11174310	39433	316.188	1.116	33801	0.956	0.0034	290	tests performed														56.48	35340680	15.322
SAU	Asia	Saudi Arabia	2021-01-05	363259	104	110.143	6265	9	8.714	10278.8	2.943	3.117	177.274	0.255	0.247	0.91									11214105	39795	317.314	1.126	34321	0.971	0.0032	311.6	tests performed														56.48	35340680	15.322
SAU	Asia	Saudi Arabia	2021-01-06	363377	118	110.857	6272	7	8.286	10282.1	3.339	3.137	177.473	0.198	0.234	0.93									11250266	36161	318.338	1.023	34269	0.97	0.0032	309.1	tests performed	137862						0.39							56.48	35340680	15.322
SAU	Asia	Saudi Arabia	2021-01-07	363485	108	106.286	6278	6	7.857	10285.2	3.056	3.007	177.642	0.17	0.222	0.95									11297327	47061	319.669	1.332	35794	1.013	0.003	336.8	tests performed						13492					382			56.48	35340680	15.322
SAU	Asia	Saudi Arabia	2021-01-08	363582	97	100.571	6282	4	7.429	10287.9	2.745	2.846	177.755	0.113	0.21	0.98									11334370	37043	320.717	1.048	37205	1.053	0.0027	369.9	tests performed						13492					382			56.48	35340680	15.322
SAU	Asia	Saudi Arabia	2021-01-09	363692	110	101.857	6286	4	6.714	10291	3.113	2.882	177.869	0.113	0.19	1.01									11362694	28324	321.519	0.801	37072	1.049	0.0027	364	tests performed	178338					13492	0.5				382			56.48	35340680	15.322
SAU	Asia	Saudi Arabia	2021-01-10	363809	117	106.857	6291	5	6.429	10294.3	3.311	3.024	178.01	0.141	0.182	1.04									11405293	42599	322.724	1.205	38631	1.093	0.0028	361.5	tests performed						14304					405			56.48	35340680	15.322
SAU	Asia	Saudi Arabia	2021-01-11	363949	140	113.429	6295	4	5.571	10298.3	3.961	3.21	178.123	0.113	0.158	1.07									11455431	50138	324.143	1.419	40160	1.136	0.0028	354.1	tests performed						14792					419			56.48	35340680	15.322
SAU	Asia	Saudi Arabia	2021-01-12	364096	147	119.571	6300	5	5	10302.5	4.16	3.383	178.265	0.141	0.141	1.1									11504341	48910	325.527	1.384	41462	1.173	0.0029	346.8	tests performed						15117					428			53.7	35340680	15.322
SAU	Asia	Saudi Arabia	2021-01-13	364271	175	127.714	6304	4	4.571	10307.4	4.952	3.614	178.378	0.113	0.129	1.12									11553474	49133	326.917	1.39	43315	1.226	0.0029	339.2	tests performed						15349					434			53.7	35340680	15.322
SAU	Asia	Saudi Arabia	2021-01-14	364440	169	136.429	6310	6	4.571	10312.2	4.782	3.86	178.548	0.17	0.129	1.14									11604169	50695	328.352	1.434	43835	1.24	0.0031	321.3	tests performed						15813					447			53.7	35340680	15.322
SAU	Asia	Saudi Arabia	2021-01-15	364613	173	147.286	6313	3	4.429	10317.1	4.895	4.168	178.633	0.085	0.125	1.15									11647424	43255	329.576	1.224	44722	1.265	0.0033	303.6	tests performed						16277					461			53.7	35340680	15.322
SAU	Asia	Saudi Arabia	2021-01-16	364753	140	151.571	6318	5	4.571	10321.1	3.961	4.289	178.774	0.141	0.129	1.16									11687198	39774	330.701	1.125	46358	1.312	0.0033	305.9	tests performed	295530					16742	0.84				474			53.7	35340680	15.322
SAU	Asia	Saudi Arabia	2021-01-17	364929	176	160	6323	5	4.571	10326	4.98	4.527	178.916	0.141	0.129	1.18									11732262	45064	331.976	1.275	46710	1.322	0.0034	291.9	tests performed						16312					462			53.7	35340680	15.322
SAU	Asia	Saudi Arabia	2021-01-18	365099	170	164.286	6329	6	4.857	10330.8	4.81	4.649	179.085	0.17	0.137	1.19									11788613	56351	333.571	1.595	47597	1.347	0.0035	289.7	tests performed						15881					449			53.7	35340680	15.322
SAU	Asia	Saudi Arabia	2021-01-19	365325	226	175.571	6335	6	5	10337.2	6.395	4.968	179.255	0.17	0.141	1.2									11841178	52565	335.058	1.487	48120	1.362	0.0036	274.1	tests performed						15451					437			53.7	35340680	15.322
SAU	Asia	Saudi Arabia	2021-01-20	365563	238	184.571	6338	3	4.857	10344	6.734	5.223	179.34	0.085	0.137	1.2									11893283	52105	336.532	1.474	48544	1.374	0.0038	263	tests performed						15021					425			53.7	35340680	15.322
SAU	Asia	Saudi Arabia	2021-01-21	365775	212	190.714	6342	4	4.571	10350	5.999	5.396	179.453	0.113	0.129	1.2									11942589	49306	337.928	1.395	48346	1.368	0.0039	253.5	tests performed						14591					413			53.7	35340680	15.322
SAU	Asia	Saudi Arabia	2021-01-22	365988	213	196.429	6346	4	4.714	10356	6.027	5.558	179.566	0.113	0.133	1.19									11976464	33875	338.886	0.959	47006	1.33	0.0042	239.3	tests performed						14161					401			53.7	35340680	15.322
SAU	Asia	Saudi Arabia	2021-01-23	366185	197	204.571	6350	4	4.571	10361.6	5.574	5.789	179.68	0.113	0.129	1.19									12011991	35527	339.891	1.005	46399	1.313	0.0044	226.8	tests performed	391643					13730	1.11				389			53.7	35340680	15.322
SAU	Asia	Saudi Arabia	2021-01-24	366371	186	206	6352	2	4.143	10366.8	5.263	5.829	179.736	0.057	0.117	1.19									12055686	43695	341.128	1.236	46203	1.307	0.0045	224.3	tests performed						12768					361			53.7	35340680	15.322
SAU	Asia	Saudi Arabia	2021-01-25	366584	213	212.143	6355	3	3.714	10372.9	6.027	6.003	179.821	0.085	0.105	1.19									12100328	44642	342.391	1.263	44531	1.26	0.0048	209.9	tests performed						11806					334			53.7	35340680	15.322
SAU	Asia	Saudi Arabia	2021-01-26	366807	223	211.714	6359	4	3.429	10379.2	6.31	5.991	179.934	0.113	0.097	1.19									12146661	46333	343.702	1.311	43640	1.235	0.0049	206.1	tests performed						10844					307			53.7	35340680	15.322
SAU	Asia	Saudi Arabia	2021-01-27	367023	216	208.571	6363	4	3.571	10385.3	6.112	5.902	180.047	0.113	0.101	1.19									12191776	45115	344.979	1.277	42642	1.207	0.0049	204.4	tests performed						9882					280			53.7	35340680	15.322
SAU	Asia	Saudi Arabia	2021-01-28	367276	253	214.429	6366	3	3.429	10392.4	7.159	6.067	180.132	0.085	0.097	1.2									12240221	48445	346.349	1.371	42519	1.203	0.005	198.3	tests performed						8920					252			53.7	35340680	15.322
SAU	Asia	Saudi Arabia	2021-01-29	367543	267	222.143	6368	2	3.143	10400	7.555	6.286	180.189	0.057	0.089	1.2									12276989	36768	347.39	1.04	42932	1.215	0.0052	193.3	tests performed						7958					225			53.7	35340680	15.322
SAU	Asia	Saudi Arabia	2021-01-30	367813	270	232.571	6372	4	3.143	10407.6	7.64	6.581	180.302	0.113	0.089	1.21									12313953	36964	348.436	1.046	43137	1.221	0.0054	185.5	tests performed	440618					6996	1.25				198			53.7	35340680	15.322
SAU	Asia	Saudi Arabia	2021-01-31	368074	261	243.286	6375	3	3.286	10415	7.385	6.884	180.387	0.085	0.093	1.21									12358449	44496	349.695	1.259	43252	1.224	0.0056	177.8	tests performed						6047					171			53.7	35340680	15.322
SAU	Asia	Saudi Arabia	2021-02-01	368329	255	249.286	6379	4	3.429	10422.2	7.215	7.054	180.5	0.113	0.097	1.2									12410625	52176	351.171	1.476	44328	1.254	0.0056	177.8	tests performed						5097					144			53.7	35340680	15.322
SAU	Asia	Saudi Arabia	2021-02-02	368639	310	261.714	6383	4	3.429	10431	8.772	7.405	180.613	0.113	0.097	1.2									12462222	51597	352.631	1.46	45080	1.276	0.0058	172.2	tests performed						4148					117			53.7	35340680	15.322
SAU	Asia	Saudi Arabia	2021-02-03	368945	306	274.571	6386	3	3.286	10439.7	8.659	7.769	180.698	0.085	0.093	1.2									12517073	54851	354.183	1.552	46471	1.315	0.0059	169.2	tests performed						3198					90			53.7	35340680	15.322
SAU	Asia	Saudi Arabia	2021-02-04	369248	303	281.714	6389	3	3.286	10448.2	8.574	7.971	180.783	0.085	0.093	1.2									12571129	54056	355.713	1.53	47273	1.338	0.006	167.8	tests performed						2249					64			57.41	35340680	15.322
SAU	Asia	Saudi Arabia	2021-02-05	369575	327	290.286	6393	4	3.571	10457.5	9.253	8.214	180.896	0.113	0.101	1.19									12617003	45874	357.011	1.298	48573	1.374	0.006	167.3	tests performed						1299					37			57.41	35340680	15.322
SAU	Asia	Saudi Arabia	2021-02-06	369961	386	306.857	6397	4	3.571	10468.4	10.922	8.683	181.01	0.113	0.101	1.19									12663169	46166	358.317	1.306	49888	1.412	0.0062	162.6	tests performed						350					10			57.41	35340680	15.322
SAU	Asia	Saudi Arabia	2021-02-07	370278	317	314.857	6402	5	3.857	10477.4	8.97	8.909	181.151	0.141	0.109	1.18									12711429	48260	359.683	1.366	50426	1.427	0.0062	160.2	tests performed						350					10			57.41	35340680	15.322
SAU	Asia	Saudi Arabia	2021-02-08	370634	356	329.286	6406	4	3.857	10487.5	10.073	9.317	181.264	0.113	0.109	1.17									12764468	53039	361.183	1.501	50549	1.43	0.0065	153.5	tests performed						350					10			57.41	35340680	15.322
SAU	Asia	Saudi Arabia	2021-02-09	370987	353	335.429	6410	4	3.857	10497.4	9.988	9.491	181.377	0.113	0.109	1.15									12815410	50942	362.625	1.441	50455	1.428	0.0066	150.4	tests performed						350					10			57.41	35340680	15.322
SAU	Asia	Saudi Arabia	2021-02-10	371356	369	344.429	6415	5	4.143	10507.9	10.441	9.746	181.519	0.141	0.117	1.14									12865749	50339	364.049	1.424	49811	1.409	0.0069	144.6	tests performed	444465					350	1.26				10			57.41	35340680	15.322
SAU	Asia	Saudi Arabia	2021-02-11	371720	364	353.143	6420	5	4.429	10518.2	10.3	9.993	181.66	0.141	0.125	1.12									12918203	52454	365.534	1.484	49582	1.403	0.0071	140.4	tests performed						418					12			57.41	35340680	15.322
SAU	Asia	Saudi Arabia	2021-02-12	372073	353	356.857	6424	4	4.429	10528.2	9.988	10.098	181.774	0.113	0.125	1.11									12965044	46841	366.859	1.325	49720	1.407	0.0072	139.3	tests performed						486					14			57.41	35340680	15.322
SAU	Asia	Saudi Arabia	2021-02-13	372410	337	349.857	6429	5	4.571	10537.7	9.536	9.9	181.915	0.141	0.129	1.09									13006509	41465	368.032	1.173	49049	1.388	0.0071	140.2	tests performed	446940					553	1.26				16			57.41	35340680	15.322
SAU	Asia	Saudi Arabia	2021-02-14	372732	322	350.571	6433	4	4.429	10546.8	9.111	9.92	182.028	0.113	0.125	1.08									13055569	49060	369.42	1.388	49163	1.391	0.0071	140.2	tests performed						1637					46			57.41	35340680	15.322
SAU	Asia	Saudi Arabia	2021-02-15	373046	314	344.571	6438	5	4.571	10555.7	8.885	9.75	182.17	0.141	0.129	1.07									13107926	52357	370.902	1.481	49065	1.388	0.007	142.4	tests performed	462812					2721	1.31				77			57.41	35340680	15.322
SAU	Asia	Saudi Arabia	2021-02-16	373368	322	340.143	6441	3	4.429	10564.8	9.111	9.625	182.255	0.085	0.125	1.06									13157534	49608	372.306	1.404	48875	1.383	0.007	143.7	tests performed						5449					154			57.41	35340680	15.322
SAU	Asia	Saudi Arabia	2021-02-17	373702	334	335.143	6445	4	4.286	10574.3	9.451	9.483	182.368	0.113	0.121	1.05									13208953	51419	373.761	1.455	49029	1.387	0.0068	146.3	tests performed	501710					8178	1.42				231			57.41	35340680	15.322
SAU	Asia	Saudi Arabia	2021-02-18	374029	327	329.857	6450	5	4.286	10583.5	9.253	9.334	182.509	0.141	0.121	1.04									13257732	48779	375.141	1.38	48504	1.372	0.0068	147	tests performed						10891					308			57.41	35340680	15.322
SAU	Asia	Saudi Arabia	2021-02-19	374366	337	327.571	6454	4	4.286	10593.1	9.536	9.269	182.622	0.113	0.121	1.04									13296108	38376	376.227	1.086	47295	1.338	0.0069	144.4	tests performed						13604					385			57.41	35340680	15.322
SAU	Asia	Saudi Arabia	2021-02-20	374691	325	325.857	6457	3	4	10602.3	9.196	9.22	182.707	0.085	0.113	1.04									13332326	36218	377.252	1.025	46545	1.317	0.007	142.8	tests performed						16318					462			57.41	35340680	15.322
SAU	Asia	Saudi Arabia	2021-02-21	375006	315	324.857	6461	4	4	10611.2	8.913	9.192	182.82	0.113	0.113	1.04									13373336	41010	378.412	1.16	45395	1.284	0.0072	139.7	tests performed						18015					510			57.41	35340680	15.322
SAU	Asia	Saudi Arabia	2021-02-22	375333	327	326.714	6466	5	4	10620.4	9.253	9.245	182.962	0.141	0.113	1.04									13418416	45080	379.688	1.276	44356	1.255	0.0074	135.8	tests performed	600798					19712	1.7				558			57.41	35340680	15.322
SAU	Asia	Saudi Arabia	2021-02-23	375668	335	328.571	6470	4	4.143	10629.9	9.479	9.297	183.075	0.113	0.117	1.03									13463804	45388	380.972	1.284	43753	1.238	0.0075	133.2	tests performed						19704					558			57.41	35340680	15.322
SAU	Asia	Saudi Arabia	2021-02-24	376021	353	331.286	6475	5	4.286	10639.9	9.988	9.374	183.217	0.141	0.121	1.03									13509412	45608	382.262	1.291	42923	1.215	0.0077	129.6	tests performed	639587					19697	1.81				557			57.41	35340680	15.322
SAU	Asia	Saudi Arabia	2021-02-25	376377	356	335.429	6480	5	4.286	10650	10.073	9.491	183.358	0.141	0.121	1.03									13554439	45027	383.536	1.274	42387	1.199	0.0079	126.4	tests performed						23584					667			57.41	35340680	15.322
SAU	Asia	Saudi Arabia	2021-02-26	376723	346	336.714	6483	3	4.143	10659.8	9.79	9.528	183.443	0.085	0.117	1.03									13594146	39707	384.66	1.124	42577	1.205	0.0079	126.4	tests performed						27471					777			57.41	35340680	15.322
SAU	Asia	Saudi Arabia	2021-02-27	377061	338	338.571	6488	5	4.429	10669.3	9.564	9.58	183.584	0.141	0.125	1.03									13633077	38931	385.762	1.102	42964	1.216	0.0079	126.9	tests performed	780667					31358	2.21				887			57.41	35340680	15.322
SAU	Asia	Saudi Arabia	2021-02-28	377383	322	339.571	6494	6	4.714	10678.4	9.111	9.609	183.754	0.17	0.133	1.03									13680202	47125	387.095	1.333	43838	1.24	0.0077	129.1	tests performed						36008					1019			57.41	35340680	15.322
SAU	Asia	Saudi Arabia	2021-03-01	377700	317	338.143	6500	6	4.857	10687.4	8.97	9.568	183.924	0.17	0.137	1.03									13727492	47290	388.433	1.338	44154	1.249	0.0077	130.6	tests performed	885411					40659	2.51				1150			57.41	35340680	15.322
SAU	Asia	Saudi Arabia	2021-03-02	378002	302	333.429	6505	5	5	10695.9	8.545	9.435	184.066	0.141	0.141	1.03									13782574	55082	389.992	1.559	45539	1.289	0.0073	136.6	tests performed	1003287				117876	54728	2.84				1549			57.41	35340680	15.322
SAU	Asia	Saudi Arabia	2021-03-03	378333	331	330.286	6510	5	5	10705.3	9.366	9.346	184.207	0.141	0.141	1.04									13829692	47118	391.325	1.333	45754	1.295	0.0072	138.5	tests performed						64790					1833			57.41	35340680	15.322
SAU	Asia	Saudi Arabia	2021-03-04	378708	375	333	6514	4	4.857	10715.9	10.611	9.423	184.32	0.113	0.137	1.04									13882429	52737	392.817	1.492	46856	1.326	0.0071	140.7	tests performed	1182943					70904	3.35				2006			57.41	35340680	15.322
SAU	Asia	Saudi Arabia	2021-03-05	379092	384	338.429	6519	5	5.143	10726.8	10.866	9.576	184.462	0.141	0.146	1.05									13930507	48078	394.178	1.36	48052	1.36	0.007	142	tests performed	1264878				81935	75891	3.58				2147			57.41	35340680	15.322
SAU	Asia	Saudi Arabia	2021-03-06	379474	382	344.714	6524	5	5.143	10737.6	10.809	9.754	184.603	0.141	0.146	1.05									13972208	41701	395.358	1.18	48447	1.371	0.0071	140.5	tests performed						74020					2094			57.41	35340680	15.322
SAU	Asia	Saudi Arabia	2021-03-07	379831	357	349.714	6528	4	4.857	10747.7	10.102	9.896	184.716	0.113	0.137	1.05									14019999	47791	396.71	1.352	48542	1.374	0.0072	138.8	tests performed	1332740					71386	3.77				2020			53.7	35340680	15.322
SAU	Asia	Saudi Arabia	2021-03-08	380182	351	354.571	6534	6	4.857	10757.6	9.932	10.033	184.886	0.17	0.137	1.05									14076117	56118	398.298	1.588	49804	1.409	0.0071	140.5	tests performed	1484935				152195	85646	4.2				2423			53.7	35340680	15.322
SAU	Asia	Saudi Arabia	2021-03-09	380572	390	367.143	6539	5	4.857	10768.7	11.035	10.389	185.028	0.141	0.137	1.05									14130542	54425	399.838	1.54	49710	1.407	0.0074	135.4	tests performed	1585770				100835	83212	4.49				2355			53.7	35340680	15.322
SAU	Asia	Saudi Arabia	2021-03-10	380958	386	375	6545	6	5	10779.6	10.922	10.611	185.197	0.17	0.141	1.05									14175803	45261	401.119	1.281	49444	1.399	0.0076	131.9	tests performed	1685881				100111	84681	4.77				2396			53.7	35340680	15.322
SAU	Asia	Saudi Arabia	2021-03-11	381348	390	377.143	6551	6	5.286	10790.6	11.035	10.672	185.367	0.17	0.15	1.05									14227459	51656	402.58	1.462	49290	1.395	0.0077	130.7	tests performed	1823819				137938	91554	5.16				2591			53.7	35340680	15.322
SAU	Asia	Saudi Arabia	2021-03-12	381708	360	373.714	6556	5	5.286	10800.8	10.187	10.575	185.509	0.141	0.15	1.05									14272412	44953	403.852	1.272	48844	1.382	0.0077	130.7	tests performed	1938934				115115	96294	5.49				2725			53.7	35340680	15.322
SAU	Asia	Saudi Arabia	2021-03-13	382059	351	369.286	6563	7	5.571	10810.7	9.932	10.449	185.707	0.198	0.158	1.05									14307143	34731	404.835	0.983	47848	1.354	0.0077	129.6	tests performed	2082780				143846	111996	5.89				3169			53.7	35340680	15.322
SAU	Asia	Saudi Arabia	2021-03-14	382407	348	368	6567	4	5.571	10820.6	9.847	10.413	185.82	0.113	0.158	1.05									14352790	45647	406.127	1.292	47542	1.345	0.0077	129.2	tests performed	2232110				149330	128481	6.32				3635			53.7	35340680	15.322
SAU	Asia	Saudi Arabia	2021-03-15	382752	345	367.143	6573	6	5.571	10830.4	9.762	10.389	185.99	0.17	0.158	1.06									14406080	53290	407.634	1.508	47138	1.334	0.0078	128.4	tests performed	2394182				162072	129892	6.77				3675			53.7	35340680	15.322
SAU	Asia	Saudi Arabia	2021-03-16	383106	354	362	6578	5	5.571	10840.4	10.017	10.243	186.131	0.141	0.158	1.06									14456483	50403	409.061	1.426	46563	1.318	0.0078	128.6	tests performed	2457425				63243	124522	6.95				3523			53.7	35340680	15.322
SAU	Asia	Saudi Arabia	2021-03-17	383499	393	363	6585	7	5.714	10851.5	11.12	10.271	186.329	0.198	0.162	1.07									14503622	47139	410.395	1.334	46831	1.325	0.0078	129	tests performed	2580949				123524	127867	7.3				3618			53.7	35340680	15.322
SAU	Asia	Saudi Arabia	2021-03-18	383880	381	361.714	6591	6	5.714	10862.3	10.781	10.235	186.499	0.17	0.162	1.07									14547879	44257	411.647	1.252	45774	1.295	0.0079	126.5	tests performed	2695966				115017	124592	7.63				3525			53.7	35340680	15.322
SAU	Asia	Saudi Arabia	2021-03-19	384271	391	366.143	6596	5	5.714	10873.3	11.064	10.36	186.64	0.141	0.162	1.08									14585281	37402	412.705	1.058	44696	1.265	0.0082	122.1	tests performed	2922436				226470	140500	8.27				3976			53.7	35340680	15.322
SAU	Asia	Saudi Arabia	2021-03-20	384653	382	370.571	6602	6	5.571	10884.1	10.809	10.486	186.81	0.17	0.158	1.1									14620008	34727	413.688	0.983	44695	1.265	0.0083	120.6	tests performed	3006419				83983	131948	8.51				3734			53.7	35340680	15.322
SAU	Asia	Saudi Arabia	2021-03-21	385020	367	373.286	6609	7	6	10894.5	10.385	10.562	187.008	0.198	0.17	1.11									14664169	44161	414.937	1.25	44483	1.259	0.0084	119.2	tests performed	3194715				188296	137515	9.04				3891			53.7	35340680	15.322
SAU	Asia	Saudi Arabia	2021-03-22	385424	404	381.714	6613	4	5.714	10906	11.432	10.801	187.121	0.113	0.162	1.12									14717992	53823	416.46	1.523	44559	1.261	0.0086	116.7	tests performed	3343287				148572	135586	9.46				3837			53.7	35340680	15.322
SAU	Asia	Saudi Arabia	2021-03-23	385834	410	389.714	6618	5	5.714	10917.6	11.601	11.027	187.263	0.141	0.162	1.13									14763869	45877	417.758	1.298	43912	1.243	0.0089	112.7	tests performed	3505695				162408	149753	9.92				4237			53.7	35340680	15.322
SAU	Asia	Saudi Arabia	2021-03-24	386300	466	400.143	6624	6	5.571	10930.7	13.186	11.322	187.433	0.17	0.158	1.15									14812806	48937	419.143	1.385	44169	1.25	0.0091	110.4	tests performed	3655546				149851	153514	10.34				4344			53.7	35340680	15.322
SAU	Asia	Saudi Arabia	2021-03-25	386782	482	414.571	6630	6	5.571	10944.4	13.639	11.731	187.603	0.17	0.158	1.16									14869237	56431	420.74	1.597	45908	1.299	0.009	110.7	tests performed	3810698				155152	159247	10.78				4506			53.7	35340680	15.322
SAU	Asia	Saudi Arabia	2021-03-26	387292	510	431.571	6637	7	5.857	10958.8	14.431	12.212	187.801	0.198	0.166	1.17									14915565	46328	422.051	1.311	47183	1.335	0.0091	109.3	tests performed	3895858				85160	139060	11.02				3935			53.7	35340680	15.322
SAU	Asia	Saudi Arabia	2021-03-27	387794	502	448.714	6643	6	5.857	10973	14.205	12.697	187.97	0.17	0.166	1.19									14959623	44058	423.298	1.247	48516	1.373	0.0092	108.1	tests performed	4003477				107619	142437	11.33				4030			53.7	35340680	15.322
SAU	Asia	Saudi Arabia	2021-03-28	388325	531	472.143	6650	7	5.857	10988	15.025	13.36	188.168	0.198	0.166	1.2									15008398	48775	424.678	1.38	49176	1.391	0.0096	104.2	tests performed	4132630				129153	133988	11.69				3791			53.7	35340680	15.322
SAU	Asia	Saudi Arabia	2021-03-29	388866	541	491.714	6656	6	6.143	11003.4	15.308	13.914	188.338	0.17	0.174	1.2									15066024	57626	426.308	1.631	49719	1.407	0.0099	101.1	tests performed	4250055				117425	129538	12.03				3665			53.7	35340680	15.322
SAU	Asia	Saudi Arabia	2021-03-30	389422	556	512.571	6663	7	6.429	11019.1	15.733	14.504	188.536	0.198	0.182	1.21									15126112	60088	428.009	1.7	51749	1.464	0.0099	101	tests performed	4326576				76521	117269	12.24				3318			53.7	35340680	15.322
SAU	Asia	Saudi Arabia	2021-03-31	390007	585	529.571	6669	6	6.429	11035.6	16.553	14.985	188.706	0.17	0.182	1.22									15184311	58199	429.655	1.647	53072	1.502	0.01	100.2	tests performed	4432572				105996	111004	12.54				3141			53.7	35340680	15.322
SAU	Asia	Saudi Arabia	2021-04-01	390597	590	545	6676	7	6.571	11052.3	16.695	15.421	188.904	0.198	0.186	1.22									15245394	61083	431.384	1.728	53737	1.521	0.0101	98.6	tests performed	4584006				151434	110473	12.97				3126			53.7	35340680	15.322
SAU	Asia	Saudi Arabia	2021-04-02	391325	728	576.143	6684	8	6.714	11072.9	20.599	16.303	189.13	0.226	0.19	1.23									15299171	53777	432.905	1.522	54801	1.551	0.0105	95.1	tests performed	4729235				145229	119054	13.38				3369			53.7	35340680	15.322
SAU	Asia	Saudi Arabia	2021-04-03	392009	684	602.143	6690	6	6.714	11092.3	19.354	17.038	189.3	0.17	0.19	1.23									15350585	51414	434.36	1.455	55852	1.58	0.0108	92.8	tests performed	4877442				148207	124852	13.8				3533			53.7	35340680	15.322
SAU	Asia	Saudi Arabia	2021-04-04	392682	673	622.429	6697	7	6.714	11111.3	19.043	17.612	189.498	0.198	0.19	1.24									15407491	56906	435.97	1.61	57013	1.613	0.0109	91.6	tests performed	5000120				122678	123927	14.15				3507			53.7	35340680	15.322
SAU	Asia	Saudi Arabia	2021-04-05	393377	695	644.429	6704	7	6.857	11131	19.666	18.235	189.696	0.198	0.194	1.24									15469923	62432	437.737	1.767	57700	1.633	0.0112	89.5	tests performed	5118039				117919	123998	14.48				3509			53.7	35340680	15.322
SAU	Asia	Saudi Arabia	2021-04-06	394169	792	678.143	6711	7	6.857	11153.4	22.41	19.189	189.894	0.198	0.194	1.23									15533915	63992	439.548	1.811	58258	1.648	0.0116	85.9	tests performed	5345625				227586	145578	15.13				4119			53.7	35340680	15.322
SAU	Asia	Saudi Arabia	2021-04-07	394952	783	706.429	6719	8	7.143	11175.6	22.156	19.989	190.121	0.226	0.202	1.23									15605861	71946	441.583	2.036	60221	1.704	0.0117	85.2	tests performed	5578229				232604	163665	15.78				4631			53.7	35340680	15.322
SAU	Asia	Saudi Arabia	2021-04-08	395854	902	751	6728	9	7.429	11201.1	25.523	21.25	190.376	0.255	0.21	1.23									15676905	71044	443.594	2.01	61644	1.744	0.0122	82.1	tests performed	5846745				268516	180391	16.54				5104			53.7	35340680	15.322
SAU	Asia	Saudi Arabia	2021-04-09	396758	904	776.143	6737	9	7.571	11226.7	25.58	21.962	190.63	0.255	0.214	1.22									15738545	61640	445.338	1.744	62768	1.776	0.0124	80.9	tests performed	5989026				142281	179970	16.95				5092			53.7	35340680	15.322
SAU	Asia	Saudi Arabia	2021-04-10	397636	878	803.857	6747	10	8.143	11251.5	24.844	22.746	190.913	0.283	0.23	1.21									15797442	58897	447.004	1.667	63837	1.806	0.0126	79.4	tests performed	6132124				143098	179240	17.35				5072			53.7	35340680	15.322
SAU	Asia	Saudi Arabia	2021-04-11	398435	799	821.857	6754	7	8.143	11274.1	22.609	23.255	191.111	0.198	0.23	1.2									15857235	59793	448.696	1.692	64249	1.818	0.0128	78.2	tests performed	6287432				155308	183902	17.79				5204			53.7	35340680	15.322
SAU	Asia	Saudi Arabia	2021-04-12	399277	842	842.857	6765	11	8.714	11297.9	23.825	23.849	191.422	0.311	0.247	1.19									15919088	61853	450.447	1.75	64166	1.816	0.0131	76.1	tests performed	6411162				123730	184732	18.14				5227			53.7	35340680	15.322
SAU	Asia	Saudi Arabia	2021-04-13	400228	951	865.571	6773	8	8.857	11324.9	26.909	24.492	191.649	0.226	0.251	1.19									15973019	53931	451.973	1.526	62729	1.775	0.0138	72.5	tests performed	6527823				116661	168885	18.47				4779			53.7	35340680	15.322
SAU	Asia	Saudi Arabia	2021-04-14	401157	929	886.429	6781	8	8.857	11351.1	26.287	25.082	191.875	0.226	0.251	1.18									16018862	45843	453.27	1.297	59000	1.669	0.015	66.6	tests performed	6584000				56177	143682	18.63				4066			53.7	35340680	15.322
SAU	Asia	Saudi Arabia	2021-04-15	402142	985	898.286	6791	10	9	11379	27.872	25.418	192.158	0.283	0.255	1.17									16072606	53744	454.791	1.521	56529	1.6	0.0159	62.9	tests performed	6723186				139186	125206	19.02				3543			53.7	35340680	15.322
SAU	Asia	Saudi Arabia	2021-04-16	403106	964	906.857	6801	10	9.143	11406.3	27.277	25.66	192.441	0.283	0.259	1.16									16123732	51126	456.237	1.447	55027	1.557	0.0165	60.7	tests performed	6831440				108254	120345	19.33				3405			53.7	35340680	15.322
SAU	Asia	Saudi Arabia	2021-04-17	404054	948	916.857	6810	9	9	11433.1	26.825	25.943	192.696	0.255	0.255	1.15									16174957	51225	457.687	1.449	53931	1.526	0.017	58.8	tests performed	6992242				160802	122874	19.79				3477			53.7	35340680	15.322
SAU	Asia	Saudi Arabia	2021-04-18	404970	916	933.571	6823	13	9.857	11459	25.919	26.416	193.064	0.368	0.279	1.14									16231540	56583	459.288	1.601	53472	1.513	0.0175	57.3	tests performed	7190402				198160	128996	20.35				3650			53.7	35340680	15.322
SAU	Asia	Saudi Arabia	2021-04-19	405940	970	951.857	6834	11	9.857	11486.5	27.447	26.934	193.375	0.311	0.279	1.13									16293609	62069	461.044	1.756	53503	1.514	0.0178	56.2	tests performed	7325016				134614	130551	20.73				3694			53.7	35340680	15.322
SAU	Asia	Saudi Arabia	2021-04-20	407010	1070	968.857	6846	12	10.429	11516.8	30.277	27.415	193.714	0.34	0.295	1.13									16352116	58507	462.7	1.656	54157	1.532	0.0179	55.9	tests performed	7459261				134245	133063	21.11				3765			53.7	35340680	15.322
SAU	Asia	Saudi Arabia	2021-04-21	408038	1028	983	6858	12	11	11545.8	29.088	27.815	194.054	0.34	0.311	1.12									16414039	61923	464.452	1.752	56454	1.597	0.0174	57.4	tests performed	7653634				194373	152805	21.66				4324			53.7	35340680	15.322
SAU	Asia	Saudi Arabia	2021-04-22	409093	1055	993	6869	11	11.143	11575.7	29.852	28.098	194.365	0.311	0.315	1.11									16477359	63320	466.243	1.792	57822	1.636	0.0172	58.2	tests performed	7809612				155978	155204	22.1				4392			53.7	35340680	15.322
SAU	Asia	Saudi Arabia	2021-04-23	410191	1098	1012.14	6878	9	11	11606.8	31.069	28.64	194.62	0.255	0.311	1.1									16536092	58733	467.905	1.662	58909	1.667	0.0172	58.2	tests performed	7944950				135338	159073	22.48				4501			53.7	35340680	15.322
SAU	Asia	Saudi Arabia	2021-04-24	411263	1072	1029.86	6887	9	11	11637.1	30.333	29.141	194.875	0.255	0.311	1.09									16586438	50346	469.33	1.425	58783	1.663	0.0175	57.1	tests performed	8059757				114807	152502	22.81				4315			53.7	35340680	15.322
SAU	Asia	Saudi Arabia	2021-04-25	412216	953	1035.14	6900	13	11	11664.1	26.966	29.29	195.242	0.368	0.311	1.08									16643921	57483	470.956	1.627	58912	1.667	0.0176	56.9	tests performed	8263836				204079	153348	23.38				4339			53.7	35340680	15.322
SAU	Asia	Saudi Arabia	2021-04-26	413174	958	1033.43	6913	13	11.286	11691.2	27.108	29.242	195.61	0.368	0.319	1.07									16708703	64782	472.79	1.833	59299	1.678	0.0174	57.4	tests performed	8488862				225026	166264	24.02				4705			53.7	35340680	15.322
SAU	Asia	Saudi Arabia	2021-04-27	414219	1045	1029.86	6922	9	10.857	11720.7	29.569	29.141	195.865	0.255	0.307	1.06									16774888	66185	474.662	1.873	60396	1.709	0.0171	58.6	tests performed	8693407				204545	176307	24.6				4989			53.7	35340680	15.322
SAU	Asia	Saudi Arabia	2021-04-28	415281	1062	1034.71	6935	13	11	11750.8	30.05	29.278	196.233	0.368	0.311	1.05									16838619	63731	476.466	1.803	60654	1.716	0.0171	58.6	tests performed	8880219				186812	175226	25.13				4958			53.7	35340680	15.322
SAU	Asia	Saudi Arabia	2021-04-29	416307	1026	1030.57	6946	11	11	11779.8	29.032	29.161	196.544	0.311	0.311	1.05									16903813	65194	478.31	1.845	60922	1.724	0.0169	59.1	tests performed	9032921				152702	174758	25.56				4945			53.7	35340680	15.322
SAU	Asia	Saudi Arabia	2021-04-30	417363	1056	1024.57	6957	11	11.286	11809.7	29.881	28.991	196.855	0.311	0.319	1.04									16969267	65454	480.162	1.852	61882	1.751	0.0166	60.4	tests performed	9343991				311070	199863	26.44				5655			53.7	35340680	15.322
SAU	Asia	Saudi Arabia	2021-05-01	418411	1048	1021.14	6968	11	11.571	11839.4	29.654	28.894	197.167	0.311	0.327	1.04									17031714	62447	481.929	1.767	63611	1.8	0.0161	62.3	tests performed	9488912				144921	204165	26.85				5777			53.7	35340680	15.322
SAU	Asia	Saudi Arabia	2021-05-02	419348	937	1018.86	6979	11	11.286	11865.9	26.513	28.83	197.478	0.311	0.319	1.03									17097031	65317	483.778	1.848	64730	1.832	0.0157	63.5	tests performed	9655519				166607	198812	27.32				5626			53.7	35340680	15.322
SAU	Asia	Saudi Arabia	2021-05-03	420301	953	1018.14	6992	13	11.286	11892.8	26.966	28.809	197.846	0.368	0.319	1.03									17166028	68997	485.73	1.952	65332	1.849	0.0156	64.2	tests performed	9772409				116890	183364	27.65				5188			53.7	35340680	15.322
SAU	Asia	Saudi Arabia	2021-05-04	421300	999	1011.57	7006	14	12	11921.1	28.268	28.623	198.242	0.396	0.34	1.02									17238146	72118	487.771	2.041	66180	1.873	0.0153	65.4	tests performed	9838285				65876	163554	27.84				4628			53.7	35340680	15.322
SAU	Asia	Saudi Arabia	2021-05-05	422316	1016	1005	7018	12	11.857	11949.9	28.749	28.437	198.581	0.34	0.336	1.02									17314863	76717	489.941	2.171	68035	1.925	0.0148	67.7	tests performed	9949971				111686	152822	28.15				4324			53.7	35340680	15.322
SAU	Asia	Saudi Arabia	2021-05-06	423406	1090	1014.14	7032	14	12.286	11980.7	30.843	28.696	198.977	0.396	0.348	1.02									17389803	74940	492.062	2.121	69427	1.965	0.0146	68.5	tests performed	10110907				160936	153998	28.61				4358			53.7	35340680	15.322
SAU	Asia	Saudi Arabia	2021-05-07	424445	1039	1011.71	7045	13	12.571	12010.1	29.4	28.627	199.345	0.368	0.356	1.01									17459285	69482	494.028	1.966	70003	1.981	0.0145	69.2	tests performed	10271299				160392	132473	29.06				3748			53.7	35340680	15.322
SAU	Asia	Saudi Arabia	2021-05-08	425442	997	1004.43	7059	14	13	12038.3	28.211	28.421	199.741	0.396	0.368	1.01									17527265	67980	495.952	1.924	70793	2.003	0.0142	70.5	tests performed	10441854				170555	136135	29.55				3852			53.7	35340680	15.322
SAU	Asia	Saudi Arabia	2021-05-09	426384	942	1005.14	7072	13	13.286	12065	26.655	28.442	200.109	0.368	0.376	1.01									17598087	70822	497.956	2.004	71579	2.025	0.014	71.2	tests performed	10629320				187466	139114	30.08				3936			53.7	35340680	15.322
SAU	Asia	Saudi Arabia	2021-05-10	427370	986	1009.86	7085	13	13.286	12092.9	27.9	28.575	200.477	0.368	0.376	1.01									17669879	71792	499.987	2.031	71979	2.037	0.014	71.3	tests performed	10758710				129390	140900	30.44				3987			53.7	35340680	15.322
SAU	Asia	Saudi Arabia	2021-05-11	428369	999	1009.86	7098	13	13.143	12121.1	28.268	28.575	200.845	0.368	0.372	1.01									17740919	71040	501.997	2.01	71825	2.032	0.0141	71.1	tests performed	10960820				202110	160362	31.01				4538			53.7	35340680	15.322
SAU	Asia	Saudi Arabia	2021-05-12	429389	1020	1010.43	7111	13	13.286	12150	28.862	28.591	201.213	0.368	0.376	1.01									17812376	71457	504.019	2.022	71073	2.011	0.0142	70.3	tests performed	11098788				137968	164117	31.41				4644			53.7	35340680	15.322
SAU	Asia	Saudi Arabia	2021-05-13	430505	1116	1014.14	7122	11	12.857	12181.6	31.578	28.696	201.524	0.311	0.364	1.01									17868871	56495	505.618	1.599	68438	1.937	0.0148	67.5	tests performed	11195164				96376	154894	31.68				4383			53.7	35340680	15.322
SAU	Asia	Saudi Arabia	2021-05-14	431432	927	998.143	7134	12	12.714	12207.8	26.23	28.243	201.864	0.34	0.36	1.01									17916457	47586	506.964	1.346	65310	1.848	0.0153	65.4	tests performed	11312391				117227	148727	32.01				4208			53.7	35340680	15.322
SAU	Asia	Saudi Arabia	2021-05-15	432269	837	975.286	7147	13	12.571	12231.5	23.684	27.597	202.232	0.368	0.356	1.01									17970506	54049	508.493	1.529	63320	1.792	0.0154	64.9	tests performed	11489358				176967	149643	32.51				4234			53.7	35340680	15.322
SAU	Asia	Saudi Arabia	2021-05-16	433094	825	958.571	7162	15	12.857	12254.8	23.344	27.124	202.656	0.424	0.364	1.02									18032171	61665	510.238	1.745	62012	1.755	0.0155	64.7	tests performed	11668767				179409	148492	33.02				4202			53.7	35340680	15.322
SAU	Asia	Saudi Arabia	2021-05-17	433980	886	944.286	7174	12	12.714	12279.9	25.07	26.72	202.996	0.34	0.36	1.03									18106104	73933	512.33	2.092	62318	1.763	0.0152	66	tests performed	11828549				159782	152834	33.47				4325			53.7	35340680	15.322
SAU	Asia	Saudi Arabia	2021-05-18	435027	1047	951.143	7188	14	12.857	12309.5	29.626	26.914	203.392	0.396	0.364	1.05									18194963	88859	514.845	2.514	64863	1.835	0.0147	68.2	tests performed	12020008				191459	151313	34.01				4282			53.7	35340680	15.322
SAU	Asia	Saudi Arabia	2021-05-19	436239	1212	978.571	7201	13	12.857	12343.8	34.295	27.69	203.76	0.368	0.364	1.06									18288859	93896	517.502	2.657	68069	1.926	0.0144	69.6	tests performed	12225726				205718	160991	34.59				4555			53.7	35340680	15.322
SAU	Asia	Saudi Arabia	2021-05-20	437569	1330	1009.14	7214	13	13.143	12381.5	37.634	28.555	204.127	0.368	0.372	1.07									18370537	81678	519.813	2.311	71667	2.028	0.0141	71	tests performed	12436389				210663	177318	35.19				5017			53.7	35340680	15.322
SAU	Asia	Saudi Arabia	2021-05-21	438705	1136	1039	7224	10	12.857	12413.6	32.144	29.4	204.41	0.283	0.364	1.07									18449145	78608	522.037	2.224	76098	2.153	0.0137	73.2	tests performed	12616680				180291	186327	35.7				5272			53.7	35340680	15.322
SAU	Asia	Saudi Arabia	2021-05-22	439847	1142	1082.57	7237	13	12.857	12445.9	32.314	30.632	204.778	0.368	0.364	1.07									18526414	77269	524.223	2.186	79415	2.247	0.0136	73.4	tests performed	12791781				175101	186060	36.2				5265			53.7	35340680	15.322
SAU	Asia	Saudi Arabia	2021-05-23	440914	1067	1117.14	7249	12	12.429	12476.1	30.192	31.611	205.118	0.34	0.352	1.07									18607508	81094	526.518	2.295	82191	2.326	0.0136	73.6	tests performed	12882532				90751	173395	36.45				4906			53.7	35340680	15.322
SAU	Asia	Saudi Arabia	2021-05-24	442071	1157	1155.86	7264	15	12.857	12508.8	32.738	32.706	205.542	0.424	0.364	1.07									18695690	88182	529.013	2.495	84227	2.383	0.0137	72.9	tests performed	13013462				130930	169273	36.82				4790			53.7	35340680	15.322
SAU	Asia	Saudi Arabia	2021-05-25	443460	1389	1204.71	7278	14	12.857	12548.1	39.303	34.089	205.938	0.396	0.364	1.07									18788835	93145	531.649	2.636	84839	2.401	0.0142	70.4	tests performed	13183309				169847	166186	37.3				4702			53.7	35340680	15.322
SAU	Asia	Saudi Arabia	2021-05-26	444780	1320	1220.14	7295	17	13.429	12585.5	37.351	34.525	206.419	0.481	0.38	1.06									18875464	86629	534.1	2.451	83801	2.371	0.0146	68.7	tests performed	13401177				217868	167922	37.92				4752			53.7	35340680	15.322
SAU	Asia	Saudi Arabia	2021-05-27	445963	1183	1199.14	7309	14	13.571	12619	33.474	33.931	206.815	0.396	0.384	1.05									18968030	92566	536.719	2.619	85356	2.415	0.014	71.2	tests performed	13583574				182397	163884	38.44				4637			53.7	35340680	15.322
SAU	Asia	Saudi Arabia	2021-05-28	447178	1215	1210.43	7320	11	13.714	12653.4	34.38	34.25	207.127	0.311	0.388	1.05									19046117	78087	538.929	2.21	85282	2.413	0.0142	70.5	tests performed	13723119				139545	158063	38.83				4473			53.7	35340680	15.322
SAU	Asia	Saudi Arabia	2021-05-29	448284	1106	1205.29	7334	14	13.857	12684.6	31.295	34.105	207.523	0.396	0.392	1.04									19122120	76003	541.08	2.151	85101	2.408	0.0142	70.6	tests performed	13828247				105128	148067	39.13				4190			53.7	35340680	15.322
SAU	Asia	Saudi Arabia	2021-05-30	449191	907	1182.43	7347	13	14	12710.3	25.664	33.458	207.891	0.368	0.396	1.04									19214578	92458	543.696	2.616	86724	2.454	0.0136	73.3	tests performed	14043763				215516	165890	39.74				4694			53.7	35340680	15.322
SAU	Asia	Saudi Arabia	2021-05-31	450436	1245	1195	7362	15	14	12745.5	35.229	33.814	208.315	0.424	0.396	1.04									19307011	92433	546.311	2.615	87332	2.471	0.0137	73.1	tests performed	14208292				164529	170690	40.2				4830			53.7	35340680	15.322
SAU	Asia	Saudi Arabia	2021-06-01	451687	1251	1175.29	7377	15	14.143	12780.9	35.398	33.256	208.74	0.424	0.4	1.04									19400220	93209	548.949	2.637	87341	2.471	0.0135	74.3	tests performed	14331774				123482	164066	40.55				4642			53.7	35340680	15.322
SAU	Asia	Saudi Arabia	2021-06-02	452956	1269	1168	7393	16	14	12816.8	35.908	33.05	209.192	0.453	0.396	1.03									19496450	96230	551.672	2.723	88712	2.51	0.0132	76	tests performed	14512466				180692	158756	41.06				4492			53.7	35340680	15.322
SAU	Asia	Saudi Arabia	2021-06-03	454217	1261	1179.14	7408	15	14.143	12852.5	35.681	33.365	209.617	0.424	0.4	1.03									19592843	96393	554.399	2.728	89259	2.526	0.0132	75.7	tests performed	14629297				116831	149389	41.4				4227			53.7	35340680	15.322
SAU	Asia	Saudi Arabia	2021-06-04	455418	1201	1177.14	7424	16	14.857	12886.5	33.984	33.308	210.07	0.453	0.42	1.02									19676611	83768	556.769	2.37	90071	2.549	0.0131	76.5	tests performed	14731457				102160	144048	41.68				4076			53.7	35340680	15.322
SAU	Asia	Saudi Arabia	2021-06-05	456562	1144	1182.57	7440	16	15.143	12918.9	32.371	33.462	210.522	0.453	0.428	1.02									19750566	73955	558.862	2.093	89778	2.54	0.0132	75.9	tests performed	14843196				111739	144993	42				4103			53.7	35340680	15.322
SAU	Asia	Saudi Arabia	2021-06-06	457546	984	1193.57	7456	16	15.571	12946.7	27.843	33.773	210.975	0.453	0.441	1.02									19836639	86073	561.298	2.436	88866	2.515	0.0134	74.5	tests performed	14977476				134280	133388	42.38				3774			53.7	35340680	15.322
SAU	Asia	Saudi Arabia	2021-06-07	458707	1161	1181.57	7471	15	15.571	12979.6	32.852	33.434	211.399	0.424	0.441	1.02									19929037	92398	563.912	2.614	88861	2.514	0.0133	75.2	tests performed	15099896				122420	127372	42.73				3604			53.7	35340680	15.322
SAU	Asia	Saudi Arabia	2021-06-08	459968	1261	1183	7488	17	15.857	13015.3	35.681	33.474	211.88	0.481	0.449	1.02									20021161	92124	566.519	2.607	88706	2.51	0.0133	75	tests performed	15221683				121787	127130	43.07				3597			53.7	35340680	15.322
SAU	Asia	Saudi Arabia	2021-06-09	461242	1274	1183.71	7503	15	15.714	13051.3	36.049	33.494	212.305	0.424	0.445	1.02									20113388	92227	569.128	2.61	88134	2.494	0.0134	74.5	tests performed	15361514				139831	121293	43.47				3432			53.7	35340680	15.322
SAU	Asia	Saudi Arabia	2021-06-10	461242	0	1003.57	7503	0	13.571	13051.3	0	28.397	212.305	0	0.384	1.02									20203947	90559	571.691	2.562	87301	2.47	0.0115	87	tests performed	15495105				133591	123687	43.84				3500			53.7	35340680	15.322
SAU	Asia	Saudi Arabia	2021-06-11	463703	2461	1183.57	7537	34	16.143	13120.9	69.636	33.49	213.267	0.962	0.457	1.05									20279006	75059	573.815	2.124	86056	2.435	0.0138	72.7	tests performed	15605844				110739	124912	44.16				3535			53.7	35340680	15.322
SAU	Asia	Saudi Arabia	2021-06-12	464780	1077	1174	7553	16	16.143	13151.4	30.475	33.22	213.72	0.453	0.457	1.04									20355555	76549	575.981	2.166	86427	2.446	0.0136	73.6	tests performed	15706724				100880	123361	44.44				3491			53.7	35340680	15.322
SAU	Asia	Saudi Arabia	2021-06-13	465797	1017	1178.71	7572	19	16.571	13180.2	28.777	33.353	214.257	0.538	0.469	1.04									20438923	83368	578.34	2.359	86041	2.435	0.0137	73	tests performed	15836419				129695	122706	44.81				3472			53.7	35340680	15.322
SAU	Asia	Saudi Arabia	2021-06-14	466906	1109	1171.29	7590	18	17	13211.6	31.38	33.143	214.767	0.509	0.481	1.04									20526803	87880	580.826	2.487	85395	2.416	0.0137	72.9	tests performed	15984268				147849	126339	45.23				3575			53.7	35340680	15.322
SAU	Asia	Saudi Arabia	2021-06-15	468175	1269	1172.43	7606	16	16.857	13247.5	35.908	33.175	215.219	0.453	0.477	1.04									20617677	90874	583.398	2.571	85217	2.411	0.0138	72.7	tests performed	16109908				125640	126889	45.58				3590			53.7	35340680	15.322
SAU	Asia	Saudi Arabia	2021-06-16	469414	1239	1167.43	7621	15	16.857	13282.5	35.059	33.034	215.644	0.424	0.477	1.04									20712598	94921	586.084	2.686	85601	2.422	0.0136	73.3	tests performed	16227887				117979	123768	45.92				3502			53.7	35340680	15.322
SAU	Asia	Saudi Arabia	2021-06-17	470723	1309	1354.43	7635	14	18.857	13319.6	37.039	38.325	216.04	0.396	0.534	1.03									20799293	86695	588.537	2.453	85049	2.407	0.0159	62.8	tests performed	16362898				135011	123970	46.3				3508			53.7	35340680	15.322
SAU	Asia	Saudi Arabia	2021-06-18	471959	1236	1179.43	7650	15	16.143	13354.6	34.974	33.373	216.464	0.424	0.457	1.03									20877124	77831	590.739	2.202	85445	2.418	0.0138	72.4	tests performed	16457176				94278	121619	46.57				3441			53.7	35340680	15.322
SAU	Asia	Saudi Arabia	2021-06-19	473112	1153	1190.29	7663	13	15.714	13387.2	32.625	33.68	216.832	0.368	0.445	1.03									20961776	84652	593.134	2.395	86603	2.451	0.0137	72.8	tests performed	16548174				90998	120207	46.82				3401			53.7	35340680	15.322
SAU	Asia	Saudi Arabia	2021-06-20	474191	1079	1199.14	7677	14	15	13417.7	30.531	33.931	217.228	0.396	0.424	1.03									21036893	75117	595.26	2.126	85424	2.417	0.014	71.2	tests performed	16649095				100921	116097	47.11				3285			53.7	35340680	15.322
SAU	Asia	Saudi Arabia	2021-06-21	475403	1212	1213.86	7691	14	14.429	13452	34.295	34.347	217.625	0.396	0.408	1.04									21134088	97195	598.01	2.75	86755	2.455	0.014	71.5	tests performed	16735649				86554	107340	47.36				3037			53.7	35340680	15.322
SAU	Asia	Saudi Arabia	2021-06-22	476882	1479	1243.86	7703	12	13.857	13493.9	41.85	35.196	217.964	0.34	0.392	1.04									21219115	85027	600.416	2.406	85920	2.431	0.0145	69.1	tests performed	16847375				111726	105352	47.67				2981			53.7	35340680	15.322
SAU	Asia	Saudi Arabia	2021-06-23	478135	1253	1245.86	7716	13	13.571	13529.3	35.455	35.253	218.332	0.368	0.384	1.04									21310136	91021	602.992	2.576	85363	2.415	0.0146	68.5	tests performed	16933104				85729	100745	47.91				2851			53.7	35340680	15.322
SAU	Asia	Saudi Arabia	2021-06-24	479390	1255	1238.14	7730	14	13.571	13564.8	35.511	35.034	218.728	0.396	0.384	1.04									21413956	103820	605.929	2.938	87809	2.485	0.0141	70.9	tests performed	17035094				101990	96028	48.2				2717			53.7	35340680	15.322
SAU	Asia	Saudi Arabia	2021-06-25	480702	1312	1249	7743	13	13.286	13601.9	37.124	35.342	219.096	0.368	0.376	1.03									21506148	92192	608.538	2.609	89861	2.543	0.0139	71.9	tests performed	17108638				73544	93066	48.41				2633			53.7	35340680	15.322
SAU	Asia	Saudi Arabia	2021-06-26	482003	1301	1270.14	7760	17	13.857	13638.8	36.813	35.94	219.577	0.481	0.392	1.03									21601544	95396	611.237	2.699	91395	2.586	0.0139	72	tests performed	17217116				108478	95563	48.72				2704			53.7	35340680	15.322
SAU	Asia	Saudi Arabia	2021-06-27	483221	1218	1290	7775	15	14	13673.2	34.465	36.502	220.001	0.424	0.396	1.04									21688368	86824	613.694	2.457	93068	2.633	0.0139	72.1	tests performed	17339253	15894166	1445087		122137	98594	49.06	44.97	4.09		2790			53.7	35340680	15.322
SAU	Asia	Saudi Arabia	2021-06-28	484539	1318	1305.14	7789	14	14	13710.5	37.294	36.93	220.398	0.396	0.396	1.04									21797567	109199	616.784	3.09	94783	2.682	0.0138	72.6	tests performed	17487842	15977557	1510285		148589	107456	49.48	45.21	4.27		3041	83391	0.236	53.7	35340680	15.322
SAU	Asia	Saudi Arabia	2021-06-29	486106	1567	1317.71	7804	15	14.429	13754.9	44.34	37.286	220.822	0.424	0.408	1.04									21902140	104573	619.743	2.959	97575	2.761	0.0135	74	tests performed	17671943	16110437	1561506		184101	117795	50	45.59	4.42		3333	108136	0.306	53.7	35340680	15.322
SAU	Asia	Saudi Arabia	2021-06-30	487592	1486	1351	7819	15	14.714	13796.9	42.048	38.228	221.246	0.424	0.416	1.03									22008712	106572	622.759	3.016	99797	2.824	0.0135	73.9	tests performed	17880870	16293289	1587581		208927	135395	50.6	46.1	4.49		3831	133041	0.376	53.7	35340680	15.322
SAU	Asia	Saudi Arabia	2021-07-01	489126	1534	1390.86	7832	13	14.571	13840.3	43.406	39.356	221.614	0.368	0.412	1.02									22113886	105174	625.735	2.976	99990	2.829	0.0139	71.9	tests performed	18019069	16419217	1599852		138199	140568	50.99	46.46	4.53		3978	131263	0.371	53.7	35340680	15.322
SAU	Asia	Saudi Arabia	2021-07-02	490464	1338	1394.57	7848	16	15	13878.2	37.86	39.461	222.067	0.453	0.424	1									22201458	87572	628.213	2.478	99330	2.811	0.014	71.2	tests performed	18198743	16516737	1682006		179674	155729	51.5	46.74	4.76		4407	124514	0.352	53.7	35340680	15.322
SAU	Asia	Saudi Arabia	2021-07-03	491612	1148	1372.71	7863	15	14.714	13910.7	32.484	38.842	222.491	0.424	0.416	0.99									22286997	85539	630.633	2.42	97922	2.771	0.014	71.3	tests performed	18320428	16604577	1715851		121685	157616	51.84	46.98	4.86		4460	118402	0.335	53.7	35340680	15.322
SAU	Asia	Saudi Arabia	2021-07-04	492785	1173	1366.29	7876	13	14.429	13943.8	33.191	38.66	222.859	0.368	0.408	0.99									22381007	94010	633.293	2.66	98948	2.8	0.0138	72.4	tests performed	18460462	16705096	1755366		140034	160173	52.24	47.27	4.97		4532	115847	0.328	53.7	35340680	15.322
SAU	Asia	Saudi Arabia	2021-07-05	494032	1247	1356.14	7891	15	14.571	13979.1	35.285	38.373	223.284	0.424	0.412	0.99									22483899	102892	636.204	2.911	98047	2.774	0.0138	72.3	tests performed	18699493	16872207	1827286		239031	173093	52.91	47.74	5.17		4898	127807	0.362	53.7	35340680	15.322
SAU	Asia	Saudi Arabia	2021-07-06	495309	1277	1314.71	7907	16	14.714	14015.3	36.134	37.201	223.736	0.453	0.416	0.98									22595617	111718	639.366	3.161	99068	2.803	0.0133	75.4	tests performed	18892398	16987146	1905252		192905	174351	53.46	48.07	5.39		4933	125244	0.354	53.7	35340680	15.322
SAU	Asia	Saudi Arabia	2021-07-07	496516	1207	1274.86	7921	14	14.571	14049.4	34.153	36.073	224.133	0.396	0.412	0.98									22709413	113796	642.586	3.22	100100	2.832	0.0127	78.5	tests performed	19064998	17088207	1976791		172600	169161	53.95	48.35	5.59		4787	113560	0.321	53.7	35340680	15.322
SAU	Asia	Saudi Arabia	2021-07-08	497773	1257	1235.29	7933	12	14.429	14085	35.568	34.954	224.472	0.34	0.408	0.97									22805670	96257	645.309	2.724	98826	2.796	0.0125	80	tests performed	19262679	17198807	2063872		197681	177659	54.51	48.67	5.84		5027	111370	0.315	53.7	35340680	15.322
SAU	Asia	Saudi Arabia	2021-07-09	498906	1133	1206	7947	14	14.143	14117	32.059	34.125	224.868	0.396	0.4	0.96									22896457	90787	647.878	2.569	99286	2.809	0.0121	82.3	tests performed	19396996	17271835	2125161		134317	171179	54.89	48.87	6.01		4844	107871	0.305	53.7	35340680	15.322
SAU	Asia	Saudi Arabia	2021-07-10	500083	1177	1210.14	7963	16	14.286	14150.4	33.304	34.242	225.321	0.453	0.404	0.97									22993073	96616	650.612	2.734	100868	2.854	0.012	83.4	tests performed	19586965	17384949	2202016		189969	180934	55.42	49.19	6.23		5120	111482	0.315	53.7	35340680	15.322
SAU	Asia	Saudi Arabia	2021-07-11	501195	1112	1201.43	7976	13	14.286	14181.8	31.465	33.996	225.689	0.368	0.404	0.97									23100062	106989	653.639	3.027	102722	2.907	0.0117	85.5	tests performed	19825792	17518976	2306816		238827	195047	56.1	49.57	6.53		5519	116269	0.329	53.7	35340680	15.322
SAU	Asia	Saudi Arabia	2021-07-12	502439	1244	1201	7992	16	14.429	14217	35.2	33.984	226.142	0.453	0.408	0.98									23210491	110429	656.764	3.125	103799	2.937	0.0116	86.4	tests performed	20227729	17753002	2474727		401937	218319	57.24	50.23	7		6178	125828	0.356	53.7	35340680	15.322
SAU	Asia	Saudi Arabia	2021-07-13	503734	1295	1203.57	8006	14	14.143	14253.7	36.643	34.056	226.538	0.396	0.4	0.98									23314798	104307	659.716	2.951	102740	2.907	0.0117	85.4	tests performed	20597120	17946562	2650558		369391	243532	58.28	50.78	7.5		6891	137059	0.388	53.7	35340680	15.322
SAU	Asia	Saudi Arabia	2021-07-14	504960	1226	1206.29	8020	14	14.143	14288.4	34.691	34.133	226.934	0.396	0.4	0.98									23420405	105607	662.704	2.988	101570	2.874	0.0119	84.2	tests performed	21094827	18186896	2907931		497707	289976	59.69	51.46	8.23		8205	156956	0.444	53.7	35340680	15.322
SAU	Asia	Saudi Arabia	2021-07-15	506125	1165	1193.14	8035	15	14.571	14321.3	32.965	33.761	227.358	0.424	0.412	0.98									23537626	117221	666.021	3.317	104565	2.959	0.0114	87.6	tests performed	21556314	18397020	3159294		461487	327662	61	52.06	8.94		9272	171173	0.484	53.7	35340680	15.322
SAU	Asia	Saudi Arabia	2021-07-16	507423	1298	1216.71	8048	13	14.429	14358	36.728	34.428	227.726	0.368	0.408	0.97									23644943	107317	669.057	3.037	106927	3.026	0.0114	87.9	tests performed	21930093	18435261	3494832		373779	361871	62.05	52.16	9.89		10240	166204	0.47	53.7	35340680	15.322
SAU	Asia	Saudi Arabia	2021-07-17	508521	1098	1205.43	8063	15	14.286	14389.1	31.069	34.109	228.151	0.424	0.404	0.97									23738413	93470	671.702	2.645	106477	3.013	0.0113	88.3	tests performed	22263079	18438591	3824488		332986	382302	63	52.17	10.82		10818	150520	0.426	53.7	35340680	15.322
SAU	Asia	Saudi Arabia	2021-07-18	509576	1055	1197.29	8075	12	14.143	14419	29.852	33.878	228.49	0.34	0.4	0.98									23831953	93540	674.349	2.647	104556	2.959	0.0115	87.3	tests performed	22646489	18441597	4204892		383410	402957	64.08	52.18	11.9		11402	131803	0.373	53.7	35340680	15.322
SAU	Asia	Saudi Arabia	2021-07-19	510869	1293	1204.29	8089	14	13.857	14455.6	36.587	34.076	228.886	0.396	0.392	0.98									23936986	105033	677.321	2.972	103785	2.937	0.0116	86.2	tests performed	22870428	18441821	4428607		223939	377528	64.71	52.18	12.53		10683	98403	0.278	53.7	35340680	15.322
SAU	Asia	Saudi Arabia	2021-07-20	512142	1273	1201.14	8103	14	13.857	14491.6	36.021	33.988	229.283	0.396	0.392	0.99									24023776	86790	679.777	2.456	101283	2.866	0.0119	84.3	tests performed	23079604	18442030	4637574		209176	354641	65.31	52.18	13.12		10035	70781	0.2	53.7	35340680	15.322
SAU	Asia	Saudi Arabia	2021-07-21	513284	1142	1189.14	8115	12	13.571	14523.9	32.314	33.648	229.622	0.34	0.384	0.98									24105282	81506	682.083	2.306	97840	2.768	0.0122	82.3	tests performed	23384311	18442334	4941977		304707	327069	66.17	52.18	13.98		9255	36491	0.103	53.7	35340680	15.322
SAU	Asia	Saudi Arabia	2021-07-22	514446	1162	1188.71	8130	15	13.571	14556.8	32.88	33.636	230.047	0.424	0.384	0.98									24195410	90128	684.633	2.55	93969	2.659	0.0127	79.1	tests performed	23725741	18442676	5283065		341430	309918	67.13	52.19	14.95		8769	6522	0.018	53.7	35340680	15.322
SAU	Asia	Saudi Arabia	2021-07-23	515693	1247	1181.43	8141	11	13.286	14592.1	35.285	33.43	230.358	0.311	0.376	0.97									24284892	89482	687.165	2.532	91421	2.587	0.0129	77.4	tests performed	24008547	18442959	5565588		282806	296922	67.93	52.19	15.75		8402	1100	0.003	53.7	35340680	15.322
SAU	Asia	Saudi Arabia	2021-07-24	516949	1256	1204	8155	14	13.143	14627.6	35.54	34.068	230.754	0.396	0.372	0.97									24374920	90028	689.713	2.547	90930	2.573	0.0132	75.5	tests performed	24314234	18443264	5870970		305687	293022	68.8	52.19	16.61		8291	668	0.002	53.7	35340680	15.322
SAU	Asia	Saudi Arabia	2021-07-25	518143	1194	1223.86	8167	12	13.143	14661.4	33.785	34.63	231.093	0.34	0.372	0.98									24465430	90510	692.274	2.561	90497	2.561	0.0135	73.9	tests performed	24688885	18443639	6245246		374651	291771	69.86	52.19	17.67		8256	292	0.001	53.7	35340680	15.322
SAU	Asia	Saudi Arabia	2021-07-26	519395	1252	1218	8179	12	12.857	14696.8	35.427	34.465	231.433	0.34	0.364	0.98									24574624	109194	695.364	3.09	91091	2.578	0.0134	74.8	tests performed	25061477	18444012	6617465		372592	313007	70.91	52.19	18.72		8857	313	0.001	53.7	35340680	15.322
SAU	Asia	Saudi Arabia	2021-07-27	520774	1379	1233.14	8189	10	12.286	14735.8	39.02	34.893	231.716	0.283	0.348	0.98									24683086	108462	698.433	3.069	94187	2.665	0.0131	76.4	tests performed	25464480	18444415	7020065		403003	340697	72.05	52.19	19.86		9640	341	0.001	50	35340680	15.322
SAU	Asia	Saudi Arabia	2021-07-28	522108	1334	1260.57	8200	11	12.143	14773.6	37.747	35.669	232.027	0.311	0.344	0.96									24800706	117620	701.761	3.328	99346	2.811	0.0127	78.8	tests performed	25872997	18451457	7421540		408517	355527	73.21	52.21	21		10060	1303	0.004	50	35340680	15.322
SAU	Asia	Saudi Arabia	2021-07-29	522108	0	1094.57	8200	0	10	14773.6	0	30.972	232.027	0	0.283	0.94									24915975	115269	705.023	3.262	102938	2.913	0.0106	94	tests performed	26275904	18575016	7700888		402907	364309	74.35	52.56	21.79		10308	18906	0.053	50	35340680	15.322
SAU	Asia	Saudi Arabia	2021-07-30	522108	0	916.429	8200	0	8.429	14773.6	0	25.931	232.027	0	0.238	0.94									25029275	113300	708.228	3.206	106340	3.009	0.0086	116	tests performed	26567950	18679153	7888797		292046	365629	75.18	52.85	22.32		10346	33742	0.095	50	35340680	15.322
SAU	Asia	Saudi Arabia	2021-07-31	525730	3622	1254.43	8237	37	11.714	14876.1	102.488	35.495	233.074	1.047	0.331	0.99									25127917	98642	711.02	2.791	107571	3.044	0.0117	85.8	tests performed	26867756	18786436	8081320		299806	364789	76.03	53.16	22.87		10322	49025	0.139	50	35340680	15.322
SAU	Asia	Saudi Arabia	2021-08-01	526814	1084	1238.71	8249	12	11.714	14906.7	30.673	35.051	233.414	0.34	0.331	0.96									25226779	98862	713.817	2.797	108764	3.078	0.0114	87.8	tests performed	27322817	18979146	8343671		455061	376276	77.31	53.7	23.61		10647	76501	0.216	53.7	35340680	15.322
SAU	Asia	Saudi Arabia	2021-08-02	526814	0	1059.86	8249	0	10	14906.7	0	29.99	233.414	0	0.283	0.92									25337033	110254	716.937	3.12	108916	3.082	0.0097	102.8	tests performed	27810488	19199165	8611323		487671	392716	78.69	54.33	24.37		11112	107879	0.305	53.7	35340680	15.322
SAU	Asia	Saudi Arabia	2021-08-03	526814	0	862.857	8249	0	8.571	14906.7	0	24.415	233.414	0	0.243	0.91									25443550	106517	719.951	3.014	108638	3.074	0.0079	125.9	tests performed	28259181	19370762	8888419		448693	399243	79.96	54.81	25.15		11297	132335	0.374	53.7	35340680	15.322
SAU	Asia	Saudi Arabia	2021-08-04	526814	0	672.286	8249	0	7	14906.7	0	19.023	233.414	0	0.198	0.93									25549087	105537	722.937	2.986	106912	3.025	0.0063	159	tests performed	28583042	19516714	9066328		323861	387149	80.88	55.22	25.65		10955	152180	0.431	53.7	35340680	15.322
SAU	Asia	Saudi Arabia	2021-08-05	526814	0	672.286	8249	0	7	14906.7	0	19.023	233.414	0	0.198	0.96									25660083	110996	726.078	3.141	106301	3.008	0.0063	158.1	tests performed	29094173	19630752	9479775		511131	402610	82.32	55.55	26.82		11392	150819	0.427	53.7	35340680	15.322
SAU	Asia	Saudi Arabia	2021-08-06	531935	5121	1403.86	8311	62	15.857	15051.6	144.904	39.724	235.168	1.754	0.449	1									25747739	87656	728.558	2.48	102638	2.904	0.0137	73.1	tests performed	29322286	19719028	9603258		228113	393477	82.97	55.8	27.17		11134	148554	0.42	53.7	35340680	15.322
SAU	Asia	Saudi Arabia	2021-08-07	531935	0	886.429	8311	0	10.571	15051.6	0	25.082	235.168	0	0.299	0.9									25826939	79200	730.799	2.241	99860	2.826	0.0089	112.7	tests performed	29601733	19852575	9749158		279447	390568	83.76	56.17	27.59		11052	152306	0.431	53.7	35340680	15.322
SAU	Asia	Saudi Arabia	2021-08-08	531935	0	731.571	8311	0	8.857	15051.6	0	20.701	235.168	0	0.251	0.82									25914807	87868	733.285	2.486	98290	2.781	0.0074	134.4	tests performed	29951707	20028555	9923152		349974	375556	84.75	56.67	28.08		10627	149916	0.424	53.7	35340680	15.322
SAU	Asia	Saudi Arabia	2021-08-09	531935	0	731.571	8311	0	8.857	15051.6	0	20.701	235.168	0	0.251	0.75									26008288	93481	735.931	2.645	95894	2.713	0.0076	131.1	tests performed	30221244	20164624	10056620		269537	344394	85.51	57.06	28.46		9745	137923	0.39	53.7	35340680	15.322
SAU	Asia	Saudi Arabia	2021-08-10	531935	0	731.571	8311	0	8.857	15051.6	0	20.701	235.168	0	0.251	0.7									26095712	87424	738.404	2.474	93166	2.636	0.0079	127.4	tests performed	30544436	20315744	10228692		323192	326465	86.43	57.49	28.94		9238	134997	0.382	53.7	35340680	15.322
SAU	Asia	Saudi Arabia	2021-08-11	531935	0	731.571	8311	0	8.857	15051.6	0	20.701	235.168	0	0.251	0.67									26180818	85106	740.813	2.408	90247	2.554	0.0081	123.4	tests performed	30901898	20460951	10440947		357462	331265	87.44	57.9	29.54		9373	134891	0.382	53.7	35340680	15.322
SAU	Asia	Saudi Arabia	2021-08-12	531935	0	731.571	8311	0	8.857	15051.6	0	20.701	235.168	0	0.251	0.65									26268925	88107	743.306	2.493	86977	2.461	0.0084	118.9	tests performed	31278114	20597674	10680440		376216	311992	88.5	58.28	30.22		8828	138132	0.391	53.7	35340680	15.322
SAU	Asia	Saudi Arabia	2021-08-13	537374	5439	777	8388	77	11	15205.5	153.902	21.986	237.347	2.179	0.311	0.64									26338561	69636	745.276	1.97	84403	2.388	0.0092	108.6	tests performed	31452285	20649897	10802388		174171	304286	89	58.43	30.57		8610	132981	0.376	53.7	35340680	15.322
SAU	Asia	Saudi Arabia	2021-08-14	537374	0	777	8388	0	11	15205.5	0	21.986	237.347	0	0.311	0.63									26407885	69324	747.238	1.962	82992	2.348	0.0094	106.8	tests performed	31654206	20709236	10944970		201921	293210	89.57	58.6	30.97		8297	122380	0.346	53.7	35340680	15.322
SAU	Asia	Saudi Arabia	2021-08-15	537374	0	777	8388	0	11	15205.5	0	21.986	237.347	0	0.311	0.64									26486301	78416	749.456	2.219	81642	2.31	0.0095	105.1	tests performed	31965789	20809009	11156780		311583	287726	90.45	58.88	31.57		8141	111493	0.315	53.7	35340680	15.322
SAU	Asia	Saudi Arabia	2021-08-16	539129	1755	1027.71	8419	31	15.429	15255.2	49.659	29.08	238.224	0.877	0.437	0.64									26565684	79383	751.703	2.246	79628	2.253	0.0129	77.5	tests performed	32281173	20906174	11374999		315384	294276	91.34	59.16	32.19		8327	105936	0.3	53.7	35340680	15.322
SAU	Asia	Saudi Arabia	2021-08-17	539129	0	1027.71	8419	0	15.429	15255.2	0	29.08	238.224	0	0.437	0.62									26638652	72968	753.767	2.065	77563	2.195	0.0133	75.5	tests performed	32612078	21011882	11600196		330905	295377	92.28	59.46	32.82		8358	99448	0.281	53.7	35340680	15.322
SAU	Asia	Saudi Arabia	2021-08-18	539129	0	1027.71	8419	0	15.429	15255.2	0	29.08	238.224	0	0.437	0.61									26708643	69991	755.748	1.98	75404	2.134	0.0136	73.4	tests performed	32940547	21109035	11831512		328469	291236	93.21	59.73	33.48		8241	92583	0.262	53.7	35340680	15.322
SAU	Asia	Saudi Arabia	2021-08-19	540244	1115	1187	8439	20	18.286	15286.7	31.55	33.587	238.79	0.566	0.517	0.6									26777315	68672	757.691	1.943	72627	2.055	0.0163	61.2	tests performed	33271819	21196563	12075256		331272	284815	94.15	59.98	34.17		8059	85556	0.242	53.7	35340680	15.322
SAU	Asia	Saudi Arabia	2021-08-20	540244	0	410	8439	0	7.286	15286.7	0	11.601	238.79	0	0.206	0.57									26838253	60938	759.415	1.724	71385	2.02	0.0057	174.1	tests performed	33487478	21256778	12230700		215659	290742	94.76	60.15	34.61		8227	86697	0.245	53.7	35340680	15.322
SAU	Asia	Saudi Arabia	2021-08-21	541201	957	546.714	8457	18	9.857	15313.8	27.079	15.47	239.299	0.509	0.279	0.58									26897052	58799	761.079	1.664	69881	1.977	0.0078	127.8	tests performed	33735074	21329504	12405570		247596	297267	95.46	60.35	35.1		8411	88610	0.251	53.7	35340680	15.322
SAU	Asia	Saudi Arabia	2021-08-22	541201	0	546.714	8457	0	9.857	15313.8	0	15.47	239.299	0	0.279	0.57									26960332	63280	762.87	1.791	67719	1.916	0.0081	123.9	tests performed	34103119	21437649	12665470		368045	305333	96.5	60.66	35.84		8640	89806	0.254	53.7	35340680	15.322
SAU	Asia	Saudi Arabia	2021-08-23	541994	793	409.286	8481	24	8.857	15336.3	22.439	11.581	239.978	0.679	0.251	0.55									27029294	68962	764.821	1.951	66230	1.874	0.0062	161.8	tests performed	34470366	21538701	12931665		367247	312742	97.54	60.95	36.59		8849	90361	0.256	53.7	35340680	15.322
SAU	Asia	Saudi Arabia	2021-08-24	541994	0	409.286	8481	0	8.857	15336.3	0	11.581	239.978	0	0.251	0.53									27097223	67929	766.743	1.922	65510	1.854	0.0062	160.1	tests performed	34832319	21627214	13205105		361953	317177	98.56	61.2	37.37		8975	87905	0.249	59.26	35340680	15.322
SAU	Asia	Saudi Arabia	2021-08-25	541994	0	409.286	8481	0	8.857	15336.3	0	11.581	239.978	0	0.251	0.51									27163038	65815	768.605	1.862	64914	1.837	0.0063	158.6	tests performed	35166050	21713687	13452363		333731	317929	99.51	61.44	38.06		8996	86379	0.244	59.26	35340680	15.322
SAU	Asia	Saudi Arabia	2021-08-26	541994	0	250	8481	0	6	15336.3	0	7.074	239.978	0	0.17	0.5									27226326	63288	770.396	1.791	64144	1.815	0.0039	256.6	tests performed	35523978	21797475	13726503		357928	321737	100.52	61.68	38.84		9104	85845	0.243	59.26	35340680	15.322
SAU	Asia	Saudi Arabia	2021-08-27	543318	1324	439.143	8512	31	10.429	15373.7	37.464	12.426	240.856	0.877	0.295	0.5									27279215	52889	771.893	1.497	62995	1.783	0.007	143.4	tests performed	35746665	21841853	13904812		222687	322741	101.15	61.8	39.35		9132	83582	0.237	59.26	35340680	15.322
SAU	Asia	Saudi Arabia	2021-08-28	543318	0	302.429	8512	0	7.857	15373.7	0	8.558	240.856	0	0.222	0.44									27329589	50374	773.318	1.425	61791	1.748	0.0049	204.3	tests performed	36027089	21899035	14128054		280424	327431	101.94	61.97	39.98		9265	81362	0.23	59.26	35340680	15.322
SAU	Asia	Saudi Arabia	2021-08-29	543318	0	302.429	8512	0	7.857	15373.7	0	8.558	240.856	0	0.222	0.4									27383820	54231	774.853	1.535	60498	1.712	0.005	200	tests performed	36519290	22061992	14457298		492201	345167	103.33	62.43	40.91		9767	89192	0.252	59.26	35340680	15.322
SAU	Asia	Saudi Arabia	2021-08-30	543318	0	189.143	8512	0	4.429	15373.7	0	5.352	240.856	0	0.125	0.35									27445781	61961	776.606	1.753	59498	1.684	0.0032	314.6	tests performed	36837337	22145052	14692285		318047	338139	104.23	62.66	41.57		9568	86622	0.245	59.26	35340680	15.322
SAU	Asia	Saudi Arabia	2021-08-31	543318	0	189.143	8512	0	4.429	15373.7	0	5.352	240.856	0	0.125	0.32									27505312	59531	778.29	1.684	58298	1.65	0.0032	308.2	tests performed	37133188	22218040	14915148		295851	328696	105.07	62.87	42.2		9301	84404	0.239	59.26	35340680	15.322
SAU	Asia	Saudi Arabia	2021-09-01	543318	0	189.143	8512	0	4.429	15373.7	0	5.352	240.856	0	0.125	0.3									27561054	55742	779.868	1.577	56859	1.609	0.0033	300.6	tests performed	37352153	22275542	15076611		218965	312300	105.69	63.03	42.66		8837	80265	0.227	70.37	35340680	15.322
SAU	Asia	Saudi Arabia	2021-09-02	543318	0	189.143	8512	0	4.429	15373.7	0	5.352	240.856	0	0.125	0.27									27620409	59355	781.547	1.68	56298	1.593	0.0034	297.6	tests performed	37593149	22330852	15262297		240996	295596	106.37	63.19	43.19		8364	76197	0.216	70.37	35340680	15.322
SAU	Asia	Saudi Arabia	2021-09-03	543318	0	0	8512	0	0	15373.7	0	0	240.856	0	0	0.26									27668550	48141	782.909	1.362	55619	1.574	0		tests performed	37701606	22354373	15347233		108457	279277	106.68	63.25	43.43		7902	73217	0.207	70.37	35340680	15.322
SAU	Asia	Saudi Arabia	2021-09-04	543318	0	0	8512	0	0	15373.7	0	0	240.856	0	0	0.27									27716282	47732	784.26	1.351	55242	1.563	0		tests performed	37835216	22383288	15451928		133610	258304	107.06	63.34	43.72		7309	69179	0.196	70.37	35340680	15.322
SAU	Asia	Saudi Arabia	2021-09-05	545243	1925	275	8579	67	9.571	15428.2	54.47	7.781	242.751	1.896	0.271	0.29									27763499	47217	785.596	1.336	54240	1.535	0.0051	197.2	tests performed	38069150	22440020	15629130		233934	221409	107.72	63.5	44.22		6265	54004	0.153	70.37	35340680	15.322
SAU	Asia	Saudi Arabia	2021-09-06	545243	0	275	8579	0	9.571	15428.2	0	7.781	242.751	0	0.271	0.3									27815966	52467	787.081	1.485	52884	1.496	0.0052	192.3	tests performed	38265272	22490656	15774616		196122	203991	108.28	63.64	44.64		5772	49372	0.14	70.37	35340680	15.322
SAU	Asia	Saudi Arabia	2021-09-07	545505	262	312.429	8591	12	11.286	15435.6	7.414	8.84	243.091	0.34	0.319	0.33									27865314	49348	788.477	1.396	51429	1.455	0.0061	164.6	tests performed	38492516	22543982	15948534		227244	194190	108.92	63.79	45.13		5495	46563	0.132	70.37	35340680	15.322
SAU	Asia	Saudi Arabia	2021-09-08	545505	0	312.429	8591	0	11.286	15435.6	0	8.84	243.091	0	0.319	0.35									27915279	49965	789.891	1.414	50604	1.432	0.0062	162	tests performed	38738841	22604145	16134696		246325	198098	109.62	63.96	45.65		5605	46943	0.133	70.37	35340680	15.322
SAU	Asia	Saudi Arabia	2021-09-09	545727	222	344.143	8604	13	13.143	15441.9	6.282	9.738	243.459	0.368	0.372	0.36									27970741	55462	791.46	1.569	50047	1.416	0.0069	145.4	tests performed	39009895	22662007	16347888		271054	202392	110.38	64.12	46.26		5727	47308	0.134	70.37	35340680	15.322
SAU	Asia	Saudi Arabia	2021-09-10	545829	102	358.714	8610	6	14	15444.8	2.886	10.15	243.629	0.17	0.396	0.38									28014260	43519	792.692	1.231	49387	1.397	0.0073	137.7	tests performed	39163349	22691142	16472207		153454	208820	110.82	64.21	46.61		5909	48110	0.136	70.37	35340680	15.322
SAU	Asia	Saudi Arabia	2021-09-11	545829	0	358.714	8610	0	14	15444.8	0	10.15	243.629	0	0.396	0.4									28058487	44227	793.943	1.251	48886	1.383	0.0073	136.3	tests performed	39351793	22726957	16624836		188444	216654	111.35	64.31	47.04		6130	49096	0.139	70.37	35340680	15.322
SAU	Asia	Saudi Arabia	2021-09-12	545829	0	83.714	8610	0	4.429	15444.8	0	2.369	243.629	0	0.125	0.43									28096897	38410	795.03	1.087	47628	1.348	0.0018	568.9	tests performed	39606175	22784983	16821192		254382	219575	112.07	64.47	47.6		6213	49280	0.139	70.37	35340680	15.322
SAU	Asia	Saudi Arabia	2021-09-13	545829	0	83.714	8610	0	4.429	15444.8	0	2.369	243.629	0	0.125	0.47									28148578	51681	796.492	1.462	47516	1.345	0.0018	567.6	tests performed	39839942	22840150	16999792		233767	224953	112.73	64.63	48.1		6365	49928	0.141	70.37	35340680	15.322
SAU	Asia	Saudi Arabia	2021-09-14	545829	0	46.286	8610	0	2.714	15444.8	0	1.31	243.629	0	0.077	0.52									28198776	50198	797.913	1.42	47637	1.348	0.001	1029.2	tests performed	40034922	22886715	17148207		194980	220344	113.28	64.76	48.52		6235	48962	0.139	70.37	35340680	15.322
SAU	Asia	Saudi Arabia	2021-09-15	545829	0	46.286	8610	0	2.714	15444.8	0	1.31	243.629	0	0.077	0.59									28248324	49548	799.315	1.402	47578	1.346	0.001	1027.9	tests performed	40224990	22932990	17292000		190068	212307	113.82	64.89	48.93		6007	46978	0.133	70.37	35340680	15.322
SAU	Asia	Saudi Arabia	2021-09-16	546336	507	87	8645	35	5.857	15459.1	14.346	2.462	244.619	0.99	0.166	0.66									28302054	53730	800.835	1.52	47330	1.339	0.0018	544	tests performed	40480932	23002312	17478620		255942	210148	114.54	65.09	49.46		5946	48615	0.138	70.37	35340680	15.322
SAU	Asia	Saudi Arabia	2021-09-17	546411	75	83.143	8651	6	5.857	15461.2	2.122	2.353	244.789	0.17	0.166	0.64									28344483	42429	802.036	1.201	47175	1.335	0.0018	567.4	tests performed	40573886	23022910	17550976		92954	201505	114.81	65.15	49.66		5702	47395	0.134	70.37	35340680	15.322
SAU	Asia	Saudi Arabia	2021-09-18	546411	0	83.143	8651	0	5.857	15461.2	0	2.353	244.789	0	0.166	0.63									28388496	44013	803.281	1.245	47144	1.334	0.0018	567	tests performed	40698074	23048287	17649787		124188	192326	115.16	65.22	49.94		5442	45904	0.13	70.37	35340680	15.322
SAU	Asia	Saudi Arabia	2021-09-19	546411	0	83.143	8651	0	5.857	15461.2	0	2.353	244.789	0	0.166	0.64									28433787	45291	804.563	1.282	48127	1.362	0.0017	578.8	tests performed	40888055	23092903	17795152		189981	183126	115.7	65.34	50.35		5182	43989	0.124	70.37	35340680	15.322
SAU	Asia	Saudi Arabia	2021-09-20	546612	201	111.857	8667	16	8.143	15466.9	5.687	3.165	245.241	0.453	0.23	0.65									28489282	55495	806.133	1.57	48672	1.377	0.0023	435.1	tests performed	41035355	23126976	17908379		147300	170773	116.11	65.44	50.67		4832	40975	0.116	70.37	35340680	15.322
SAU	Asia	Saudi Arabia	2021-09-21	546681	69	121.714	8672	5	8.857	15468.9	1.952	3.444	245.383	0.141	0.251	0.64									28544333	55051	807.691	1.558	49365	1.397	0.0025	405.6	tests performed	41176166	23161466	18014700		140811	163035	116.51	65.54	50.97		4613	39250	0.111	70.37	35340680	15.322
SAU	Asia	Saudi Arabia	2021-09-22	546735	54	129.429	8679	7	9.857	15470.4	1.528	3.662	245.581	0.198	0.279	0.64									28595954	51621	809.151	1.461	49661	1.405	0.0026	383.7	tests performed	41290665	23187853	18102812		114499	152239	116.84	65.61	51.22		4308	36409	0.103	70.37	35340680	15.322
SAU	Asia	Saudi Arabia	2021-09-23	546735	0	57	8679	0	4.857	15470.4	0	1.613	245.581	0	0.137	0.63									28639604	43650	810.386	1.235	48221	1.364	0.0012	846	tests performed	41360564	23201817	18158747		69899	125662	117.03	65.65	51.38		3556	28501	0.081	70.37	35340680	15.322
SAU	Asia	Saudi Arabia	2021-09-24	546735	0	46.286	8679	0	4	15470.4	0	1.31	245.581	0	0.113	0.65									28672153	32549	811.307	0.921	46810	1.325	0.001	1011.3	tests performed	41404952	23211366	18193586		44388	118724	117.16	65.68	51.48		3359	26922	0.076	70.37	35340680	15.322
SAU	Asia	Saudi Arabia	2021-09-25	546882	147	67.286	8694	15	6.143	15474.6	4.16	1.904	246.005	0.424	0.174	0.69									28710063	37910	812.38	1.073	45938	1.3	0.0015	682.7	tests performed	41490683	23228976	18261707		85731	113230	117.4	65.73	51.67		3204	25813	0.073	70.37	35340680	15.322
SAU	Asia	Saudi Arabia	2021-09-26	546926	44	73.571	8699	5	6.857	15475.8	1.245	2.082	246.147	0.141	0.194	0.7									28754325	44262	813.632	1.252	45791	1.296	0.0016	622.4	tests performed	41641404	23267880	18373524		150721	107621	117.83	65.84	51.99		3045	24997	0.071	70.37	35340680	15.322
SAU	Asia	Saudi Arabia	2021-09-27	546985	59	53.286	8704	5	5.286	15477.5	1.669	1.508	246.288	0.141	0.15	0.7									28802841	48516	815.005	1.373	44794	1.267	0.0012	840.6	tests performed	41770485	23300944	18469541		129081	105019	118.19	65.93	52.26		2972	24853	0.07	70.37	35340680	15.322
SAU	Asia	Saudi Arabia	2021-09-28	547035	50	50.571	8709	5	5.286	15478.9	1.415	1.431	246.43	0.141	0.15	0.7									28851867	49026	816.393	1.387	43933	1.243	0.0012	868.7	tests performed	41886181	23330923	18555258		115696	101431	118.52	66.02	52.5		2870	24208	0.068	70.37	35340680	15.322
SAU	Asia	Saudi Arabia	2021-09-29	547035	0	42.857	8709	0	4.286	15478.9	0	1.213	246.43	0	0.121	0.72									28902511	50644	817.826	1.433	43794	1.239	0.001	1021.9	tests performed	41990202	23357711	18632491		104021	99934	118.82	66.09	52.72		2828	24265	0.069	70.37	35340680	15.322
SAU	Asia	Saudi Arabia	2021-09-30	547134	99	57	8716	7	5.286	15481.7	2.801	1.613	246.628	0.198	0.15	0.75									28956630	54119	819.357	1.531	45289	1.281	0.0013	794.5	tests performed	42109715	23387302	18722413		119513	107022	119.15	66.18	52.98		3028	26498	0.075	70.37	35340680	15.322
SAU	Asia	Saudi Arabia	2021-10-01	547134	0	57	8716	0	5.286	15481.7	0	1.613	246.628	0	0.15	0.77									29003896	47266	820.694	1.337	47392	1.341	0.0012	831.4	tests performed	42163997	23399260	18764737		54282	108435	119.31	66.21	53.1		3068	26842	0.076	70.37	35340680	15.322
SAU	Asia	Saudi Arabia	2021-10-02	547134	0	36	8716	0	3.143	15481.7	0	1.019	246.628	0	0.089	0.8									29050395	46499	822.01	1.316	48619	1.376	0.0007	1350.5	tests performed	42265381	23420022	18845359		101384	110671	119.59	66.27	53.32		3132	27292	0.077	70.37	35340680	15.322
SAU	Asia	Saudi Arabia	2021-10-03	547134	0	29.714	8716	0	2.429	15481.7	0	0.841	246.628	0	0.069	0.86									29097781	47386	823.351	1.341	49065	1.388	0.0006	1651.2	tests performed	42435821	23460621	18975200		170440	113488	120.08	66.38	53.69		3211	27534	0.078	70.37	35340680	15.322
SAU	Asia	Saudi Arabia	2021-10-04	547134	0	21.286	8716	0	1.714	15481.7	0	0.602	246.628	0	0.049	0.94									29151126	53345	824.86	1.509	49755	1.408	0.0004	2337.5	tests performed	42597949	23496873	19101076		162128	118209	120.54	66.49	54.05		3345	27990	0.079	70.37	35340680	15.322
SAU	Asia	Saudi Arabia	2021-10-05	547357	223	46	8730	14	3	15488	6.31	1.302	247.024	0.396	0.085	1.04									29200258	49132	826.251	1.39	49770	1.408	0.0009	1082	tests performed	42747213	23527144	19220069		149264	123005	120.96	66.57	54.39		3481	28032	0.079	70.37	35340680	15.322
SAU	Asia	Saudi Arabia	2021-10-06	547402	45	52.429	8732	2	3.286	15489.3	1.273	1.484	247.081	0.057	0.093	1.02									29251941	51683	827.713	1.462	49919	1.413	0.0011	952.1	tests performed	42913322	23560753	19352569		166109	131874	121.43	66.67	54.76		3732	29006	0.082	70.37	35340680	15.322
SAU	Asia	Saudi Arabia	2021-10-07	547449	47	45	8736	4	2.857	15490.6	1.33	1.273	247.194	0.113	0.081	0.99									29303119	51178	829.161	1.448	49498	1.401	0.0009	1100	tests performed	43098861	23595375	19503486		185539	141307	121.95	66.77	55.19		3998	29725	0.084	70.37	35340680	15.322
SAU	Asia	Saudi Arabia	2021-10-08	547497	48	51.857	8739	3	3.286	15492	1.358	1.467	247.279	0.085	0.093	0.98									29341462	38343	830.246	1.085	48224	1.365	0.0011	929.9	tests performed	43191898	23611050	19580848		93037	146843	122.22	66.81	55.41		4155	30256	0.086	70.37	35340680	15.322
SAU	Asia	Saudi Arabia	2021-10-09	547532	35	56.857	8743	4	3.857	15493	0.99	1.609	247.392	0.113	0.109	0.97									29382555	41093	831.409	1.163	47451	1.343	0.0012	834.6	tests performed	43335663	23631492	19704171		143765	152897	122.62	66.87	55.75		4326	30210	0.085	70.37	35340680	15.322
SAU	Asia	Saudi Arabia	2021-10-10	547591	59	65.286	8745	2	4.143	15494.6	1.669	1.847	247.449	0.057	0.117	0.97									29430910	48355	832.777	1.368	47590	1.347	0.0014	728.9	tests performed	43615548	23684473	19931075		279885	168532	123.41	67.02	56.4		4769	31979	0.09	75.93	35340680	15.322
SAU	Asia	Saudi Arabia	2021-10-11	547649	58	73.571	8748	3	4.571	15496.3	1.641	2.082	247.533	0.085	0.129	0.96									29484705	53795	834.299	1.522	47654	1.348	0.0015	647.7	tests performed	43852647	23731270	20121377		237099	179243	124.09	67.15	56.94		5072	33485	0.095	75.93	35340680	15.322
SAU	Asia	Saudi Arabia	2021-10-12	547704	55	49.571	8751	3	3	15497.8	1.556	1.403	247.618	0.085	0.085	0.94									29538635	53930	835.825	1.526	48340	1.368	0.001	975.2	tests performed	44052112	23774000	20278112		199465	186414	124.65	67.27	57.38		5275	35265	0.1	75.93	35340680	15.322
SAU	Asia	Saudi Arabia	2021-10-13	547761	57	51.286	8753	2	3	15499.4	1.613	1.451	247.675	0.057	0.085	0.94									29590955	52320	837.306	1.48	48431	1.37	0.0011	944.3	tests performed	44219652	23810472	20409180		167540	186619	125.12	67.37	57.75		5281	35674	0.101	75.93	35340680	15.322
SAU	Asia	Saudi Arabia	2021-10-14	547797	36	49.714	8755	2	2.714	15500.5	1.019	1.407	247.732	0.057	0.077	0.93									29658311	67356	839.212	1.906	50742	1.436	0.001	1020.7	tests performed	44374451	23844426	20530025		154799	182227	125.56	67.47	58.09		5156	35579	0.101	75.93	35340680	15.322
SAU	Asia	Saudi Arabia	2021-10-15	547845	48	49.714	8758	3	2.714	15501.8	1.358	1.407	247.816	0.085	0.077	0.94									29701762	43451	840.441	1.229	51471	1.456	0.001	1035.3	tests performed	44441515	23859776	20581739		67064	178517	125.75	67.51	58.24		5051	35532	0.101	75.93	35340680	15.322
SAU	Asia	Saudi Arabia	2021-10-16	547890	45	51.143	8760	2	2.429	15503.1	1.273	1.447	247.873	0.057	0.069	0.94									29746922	45160	841.719	1.278	52052	1.473	0.001	1017.8	tests performed	44521775	23878391	20643384		80260	169445	125.98	67.57	58.41		4795	35271	0.1	75.93	35340680	15.322
SAU	Asia	Saudi Arabia	2021-10-17	547931	41	48.571	8763	3	2.571	15504.3	1.16	1.374	247.958	0.085	0.073	0.94									29796124	49202	843.111	1.392	52173	1.476	0.0009	1074.2	tests performed	44652849	23912323	20740526		131074	148186	126.35	67.66	58.69		4193	32550	0.092	75.93	35340680	15.322
SAU	Asia	Saudi Arabia	2021-10-18	547969	38	45.714	8765	2	2.429	15505.3	1.075	1.294	248.014	0.057	0.069	0.94									29841399	45275	844.392	1.281	50956	1.442	0.0009	1114.7	tests performed	44698978	23924621	20774357		46129	120904	126.48	67.7	58.78		3421	27622	0.078	75.93	35340680	15.322
SAU	Asia	Saudi Arabia	2021-10-19	548018	49	44.857	8767	2	2.286	15506.7	1.387	1.269	248.071	0.057	0.065	0.94									29885716	44317	845.646	1.254	49583	1.403	0.0009	1105.4	tests performed	44862697	23967472	20895225		163719	115798	126.94	67.82	59.13		3277	27639	0.078	75.93	35340680	15.322
SAU	Asia	Saudi Arabia	2021-10-20	548065	47	43.429	8770	3	2.429	15508	1.33	1.229	248.156	0.085	0.069	0.95									29934785	49069	847.035	1.388	49119	1.39	0.0009	1131	tests performed	44950769	23991079	20959690		88072	104445	127.19	67.89	59.31		2955	25801	0.073	75.93	35340680	15.322
SAU	Asia	Saudi Arabia	2021-10-21	548111	46	44.857	8773	3	2.571	15509.4	1.302	1.269	248.241	0.085	0.073	0.96									29981415	46630	848.354	1.319	46158	1.306	0.001	1029	tests performed	45041861	24014216	21027645		91092	95344	127.45	67.95	59.5		2698	24256	0.069	75.93	35340680	15.322
SAU	Asia	Saudi Arabia	2021-10-22	548162	51	45.286	8774	1	2.286	15510.8	1.443	1.281	248.269	0.028	0.065	0.98									30018274	36859	849.397	1.043	45216	1.279	0.001	998.5	tests performed	45091787	24028992	21062795		49926	92896	127.59	67.99	59.6		2629	24174	0.068	75.93	35340680	15.322
SAU	Asia	Saudi Arabia	2021-10-23	548205	43	45	8776	2	2.286	15512	1.217	1.273	248.326	0.057	0.065	0.99									30055828	37554	850.46	1.063	44129	1.249	0.001	980.6	tests performed	45172188	24057315	21114873		80401	92916	127.82	68.07	59.75		2629	25561	0.072	75.93	35340680	15.322
SAU	Asia	Saudi Arabia	2021-10-24	548252	47	45.857	8778	2	2.143	15513.3	1.33	1.298	248.382	0.057	0.061	0.99									30095906	40078	851.594	1.134	42826	1.212	0.0011	933.9	tests performed	45266839	24084544	21182295		94651	87713	128.09	68.15	59.94		2482	24603	0.07	75.93	35340680	15.322
SAU	Asia	Saudi Arabia	2021-10-25	548303	51	47.714	8780	2	2.143	15514.8	1.443	1.35	248.439	0.057	0.061	1									30140728	44822	852.862	1.268	42761	1.21	0.0011	896.2	tests performed	45352626	24108157	21244469		85787	93378	128.33	68.22	60.11		2642	26219	0.074	75.93	35340680	15.322
SAU	Asia	Saudi Arabia	2021-10-26	548368	65	50	8782	2	2.143	15516.6	1.839	1.415	248.496	0.057	0.061	0.99									30188348	47620	854.21	1.347	43233	1.223	0.0012	864.7	tests performed	45428214	24129578	21298636		75588	80788	128.54	68.28	60.27		2286	23158	0.066	75.93	35340680	15.322
SAU	Asia	Saudi Arabia	2021-10-27	548423	55	51.143	8785	3	2.143	15518.2	1.556	1.447	248.58	0.085	0.061	0.99									30233942	45594	855.5	1.29	42737	1.209	0.0012	835.6	tests performed	45497613	24147841	21349772		69399	78121	128.74	68.33	60.41		2211	22395	0.063	75.93	35340680	15.322
SAU	Asia	Saudi Arabia	2021-10-28	548474	51	51.857	8788	3	2.143	15519.6	1.443	1.467	248.665	0.085	0.061	0.99									30279592	45650	856.791	1.292	42597	1.205	0.0012	821.4	tests performed	45566425	24165859	21400566		68812	74938	128.93	68.38	60.56		2120	21663	0.061	75.93	35340680	15.322
SAU	Asia	Saudi Arabia	2021-10-29	548530	56	52.571	8790	2	2.286	15521.2	1.585	1.488	248.722	0.057	0.065	0.98									30313741	34149	857.758	0.966	42210	1.194	0.0012	802.9	tests performed	45596373	24173536	21422837		29948	72084	129.02	68.4	60.62		2040	20649	0.058	75.93	35340680	15.322
SAU	Asia	Saudi Arabia	2021-10-30	548571	41	52.286	8793	3	2.429	15522.4	1.16	1.479	248.807	0.085	0.069	0.97									30349713	35972	858.776	1.018	41984	1.188	0.0012	803	tests performed	45641533	24185908	21455625		45160	67049	129.15	68.44	60.71		1897	18370	0.052	75.93	35340680	15.322
SAU	Asia	Saudi Arabia	2021-10-31	548617	46	52.143	8794	1	2.286	15523.7	1.302	1.475	248.835	0.028	0.065	0.97									30389463	39750	859.9	1.125	41937	1.187	0.0012	804.3	tests performed	45720862	24208729	21512133		79329	64860	129.37	68.5	60.87		1835	17741	0.05	75.93	35340680	15.322
SAU	Asia	Saudi Arabia	2021-11-01	548666	49	51.857	8796	2	2.286	15525.1	1.387	1.467	248.892	0.057	0.065	0.96									30433131	43668	861.136	1.236	41772	1.182	0.0012	805.5	tests performed	45784362	24226322	21558040		63500	61677	129.55	68.55	61		1745	16881	0.048	75.93	35340680	15.322
SAU	Asia	Saudi Arabia	2021-11-02	548711	45	49	8798	2	2.286	15526.3	1.273	1.387	248.948	0.057	0.065	0.95									30472075	38944	862.238	1.102	40532	1.147	0.0012	827.2	tests performed	46120529	24248200	21612557	259772	336167	98902	130.5	68.61	61.15	0.74	2799	16946	0.048	75.93	35340680	15.322
SAU	Asia	Saudi Arabia	2021-11-03	548760	49	48.143	8799	1	2	15527.7	1.387	1.362	248.977	0.028	0.057	0.95									30523377	51302	863.69	1.452	41348	1.17	0.0012	858.9	tests performed	46174722	24261265	21648540	264934	54193	96730	130.66	68.65	61.26	0.75	2737	16203	0.046	75.93	35340680	15.322
SAU	Asia	Saudi Arabia	2021-11-04	548805	45	47.286	8800	1	1.714	15529	1.273	1.338	249.005	0.028	0.049	0.94									30540992	17615	864.188	0.498	37343	1.057	0.0013	789.7	tests performed	46225391	24273577	21681961	269853	50669	94138	130.8	68.68	61.35	0.76	2664	15388	0.044	75.93	35340680	15.322
SAU	Asia	Saudi Arabia	2021-11-05	548848	43	45.429	8802	2	1.714	15530.2	1.217	1.285	249.061	0.057	0.049	0.94									30558607	17615	864.686	0.498	34981	0.99	0.0013	770	tests performed	46270412	24284570	21710595	275256	45021	96291	130.93	68.72	61.43	0.78	2725	15862	0.045	75.93	35340680	15.322
SAU	Asia	Saudi Arabia	2021-11-06	548890	42	45.571	8803	1	1.429	15531.4	1.188	1.289	249.09	0.028	0.04	0.94									30570042	11435	865.01	0.324	31476	0.891	0.0014	690.7	tests performed	46288357	24288343	21721987	278027	17945	92403	130.98	68.73	61.46	0.79	2615	14634	0.041	75.93	35340680	15.322
SAU	Asia	Saudi Arabia	2021-11-07	548930	40	44.714	8804	1	1.429	15532.5	1.132	1.265	249.118	0.028	0.04	0.94									30580599	10557	865.309	0.299	27305	0.773	0.0016	610.7	tests performed						90606					2564	13715	0.039	75.93	35340680	15.322
SAU	Asia	Saudi Arabia	2021-11-08	548973	43	43.857	8805	1	1.286	15533.7	1.217	1.241	249.146	0.028	0.036	0.93									30657679	77080	867.49	2.181	32078	0.908	0.0014	731.4	tests performed						91070					2577	13544	0.038	75.93	35340680	15.322
SAU	Asia	Saudi Arabia	2021-11-09	549022	49	44.429	8806	1	1.143	15535.1	1.387	1.257	249.175	0.028	0.032	0.93									30716480	58801	869.154	1.664	34915	0.988	0.0013	785.9	tests performed	46488601	24337520	21857119	293992		52582	131.54	68.87	61.85	0.83	1488	12760	0.036	75.93	35340680	15.322
SAU	Asia	Saudi Arabia	2021-11-10	549060	38	42.857	8807	1	1.143	15536.2	1.075	1.213	249.203	0.028	0.032	0.93									30759221	42741	870.363	1.209	33692	0.953	0.0013	786.1	tests performed	46545444	24353452	21894014	298000	56843	52960	131.71	68.91	61.95	0.84	1499	13170	0.037	75.93	35340680	15.322
SAU	Asia	Saudi Arabia	2021-11-11	549103	43	42.571	8809	2	1.286	15537.4	1.217	1.205	249.259	0.057	0.036	0.93									30799682	40461	871.508	1.145	36956	1.046	0.0012	868.1	tests performed	46612033	24372785	21936792	302456	66589	55235	131.89	68.97	62.07	0.86	1563	14173	0.04	75.93	35340680	15.322
SAU	Asia	Saudi Arabia	2021-11-12	549148	45	42.857	8810	1	1.143	15538.7	1.273	1.213	249.288	0.028	0.032	0.93									30827084	27402	872.283	0.775	38354	1.085	0.0011	894.9	tests performed	46637027	24379243	21953463	304321	24994	52374	131.96	68.98	62.12	0.86	1482	13525	0.038	75.93	35340680	15.322
SAU	Asia	Saudi Arabia	2021-11-13	549192	44	43.143	8811	1	1.143	15539.9	1.245	1.221	249.316	0.028	0.032	0.93									30863762	36678	873.321	1.038	41960	1.187	0.001	972.6	tests performed	46672541	24388956	21976248	307344	35514	54883	132.06	69.01	62.18	0.87	1553	14373	0.041	75.93	35340680	15.322
SAU	Asia	Saudi Arabia	2021-11-14	549222	30	41.714	8813	2	1.286	15540.8	0.849	1.18	249.373	0.057	0.036	0.92									30898784	35022	874.312	0.991	45455	1.286	0.0009	1089.7	tests performed	46743789	24410797	22022105	310887	71248	55526	132.27	69.07	62.31	0.88	1571	15152	0.043	75.93	35340680	15.322
SAU	Asia	Saudi Arabia	2021-11-15	549260	38	41	8816	3	1.571	15541.9	1.075	1.16	249.458	0.085	0.044	0.92									30931537	32753	875.239	0.927	39123	1.107	0.001	954.2	tests performed	46806146	24430380	22061577	314200	62357	54899	132.44	69.13	62.43	0.89	1553	15607	0.044	75.93	35340680	15.322
SAU	Asia	Saudi Arabia	2021-11-16	549297	37	39.286	8818	2	1.714	15542.9	1.047	1.112	249.514	0.057	0.049	0.91									30964745	33208	876.179	0.94	35466	1.004	0.0011	902.8	tests performed	46829090	24438282	22075529	315279	22944	48641	132.51	69.15	62.46	0.89	1376	14395	0.041	75.93	35340680	15.322
SAU	Asia	Saudi Arabia	2021-11-17	549339	42	39.857	8820	2	1.857	15544.1	1.188	1.128	249.571	0.057	0.053	0.91									30998329	33584	877.129	0.95	34158	0.967	0.0012	857	tests performed	46910179	24463682	22126411	320106	81089	52105	132.74	69.22	62.61	0.91	1474	15747	0.045	75.93	35340680	15.322
SAU	Asia	Saudi Arabia	2021-11-18	549377	38	39.143	8821	1	1.714	15545.2	1.075	1.108	249.599	0.028	0.049	0.92									31030819	32490	878.048	0.919	33020	0.934	0.0012	843.6	tests performed	46959458	24477958	22158110	323390	49279	49632	132.88	69.26	62.7	0.92	1404	15025	0.043	75.93	35340680	15.322
SAU	Asia	Saudi Arabia	2021-11-19	549412	35	37.714	8822	1	1.714	15546.2	0.99	1.067	249.627	0.028	0.049	0.92									31055094	24275	878.735	0.687	32573	0.922	0.0012	863.7	tests performed	46979616	24483026	22171309	325281	20158	48941	132.93	69.28	62.74	0.92	1385	14826	0.042	75.93	35340680	15.322
SAU	Asia	Saudi Arabia	2021-11-20	549443	31	35.857	8823	1	1.714	15547	0.877	1.015	249.656	0.028	0.049	0.92									31082178	27084	879.501	0.766	31202	0.883	0.0011	870.2	tests performed	47013241	24492088	22192521	328632	33625	48671	133.03	69.3	62.8	0.93	1377	14733	0.042	75.93	35340680	15.322
SAU	Asia	Saudi Arabia	2021-11-21	549479	36	36.714	8824	1	1.571	15548.1	1.019	1.039	249.684	0.028	0.044	0.92									31115032	32854	880.431	0.93	30893	0.874	0.0012	841.5	tests performed	47061187	24506864	22223093	331250	47946	45343	133.16	69.34	62.88	0.94	1283	13724	0.039	75.93	35340680	15.322
SAU	Asia	Saudi Arabia	2021-11-22	549518	39	36.857	8826	2	1.429	15549.2	1.104	1.043	249.741	0.057	0.04	0.92									31156562	41530	881.606	1.175	32146	0.91	0.0011	872.2	tests performed	47111648	24522627	22255376	333671	50461	43643	133.31	69.39	62.97	0.94	1235	13178	0.037	75.93	35340680	15.322
SAU	Asia	Saudi Arabia	2021-11-23	549556	38	37	8827	1	1.286	15550.2	1.075	1.047	249.769	0.028	0.036	0.92									31204126	47564	882.952	1.346	34197	0.968	0.0011	924.2	tests performed	47155332	24536094	22282865	336373	43684	46606	133.43	69.43	63.05	0.95	1319	13973	0.04	75.93	35340680	15.322
SAU	Asia	Saudi Arabia	2021-11-24	549590	34	35.857	8828	1	1.143	15551.2	0.962	1.015	249.797	0.028	0.032	0.92									31258994	54868	884.505	1.553	37238	1.054	0.001	1038.5	tests performed	47200127	24549813	22311359	338991	44795	41421	133.56	69.47	63.13	0.96	1172	12304	0.035	75.93	35340680	15.322
SAU	Asia	Saudi Arabia	2021-11-25	549618	28	34.429	8829	1	1.143	15552	0.792	0.974	249.825	0.028	0.032	0.92									31319305	60311	886.211	1.707	41212	1.166	0.0008	1197	tests performed	47244948	24562266	22340456	342228	44821	40784	133.68	69.5	63.21	0.97	1154	12044	0.034	75.93	35340680	15.322
SAU	Asia	Saudi Arabia	2021-11-26	549642	24	32.857	8830	1	1.143	15552.7	0.679	0.93	249.854	0.028	0.032	0.93									31362567	43262	887.435	1.224	43925	1.243	0.0007	1336.9	tests performed	47265454	24568254	22353415	343842	20506	40834	133.74	69.52	63.25	0.97	1155	12175	0.034	75.93	35340680	15.322
SAU	Asia	Saudi Arabia	2021-11-27	549671	29	32.571	8832	2	1.286	15553.5	0.821	0.922	249.91	0.057	0.036	0.95									31406162	43595	888.669	1.234	46283	1.31	0.0007	1421	tests performed	47293262	24576709	22370726	345852	27808	40003	133.82	69.54	63.3	0.98	1132	12089	0.034	75.93	35340680	15.322
SAU	Asia	Saudi Arabia	2021-11-28	549695	24	30.857	8833	1	1.286	15554.2	0.679	0.873	249.939	0.028	0.036	0.96									31449870	43708	889.906	1.237	47834	1.354	0.0006	1550.2	tests performed	47309172	24581780	22380259	347133	15910	35426	133.87	69.56	63.33	0.98	1002	10702	0.03	75.93	35340680	15.322
SAU	Asia	Saudi Arabia	2021-11-29	549720	25	28.857	8834	1	1.143	15554.9	0.707	0.817	249.967	0.028	0.032	0.98									31494154	44284	891.159	1.253	48227	1.365	0.0006	1671.2	tests performed	47391642	24605333	22432544	353765	82470	39999	134.1	69.62	63.48	1	1132	11815	0.033	75.93	35340680	15.322
SAU	Asia	Saudi Arabia	2021-11-30	549752	32	28	8836	2	1.286	15555.8	0.905	0.792	250.023	0.057	0.036	1.01									31536235	42081	892.349	1.191	47444	1.342	0.0006	1694.4	tests performed	47444801	24619259	22467509	358049	53159	41353	134.25	69.66	63.57	1.01	1170	11881	0.034	75.93	35340680	15.322
SAU	Asia	Saudi Arabia	2021-12-01	549786	34	28	8837	1	1.286	15556.7	0.962	0.792	250.052	0.028	0.036	1.04									31570182	33947	893.31	0.961	44455	1.258	0.0006	1587.7	tests performed	47449878	24620971	22470514	358393	5077	35679	134.26	69.67	63.58	1.01	1010	10165	0.029	75.93	35340680	15.322
SAU	Asia	Saudi Arabia	2021-12-02	549810	24	27.429	8839	2	1.429	15557.4	0.679	0.776	250.108	0.057	0.04	1.07									31610540	40358	894.452	1.142	41605	1.177	0.0007	1516.8	tests performed						35460					1003	9975	0.028	75.93	35340680	15.322
SAU	Asia	Saudi Arabia	2021-12-03	549848	38	29.429	8840	1	1.429	15558.5	1.075	0.833	250.137	0.028	0.04	1.11									31654455	43915	895.695	1.243	41698	1.18	0.0007	1416.9	tests performed	47536454	24643207	22526908	366339		38714	134.51	69.73	63.74	1.04	1095	10708	0.03	75.93	35340680	15.322
SAU	Asia	Saudi Arabia	2021-12-04	549877	29	29.429	8842	2	1.429	15559.3	0.821	0.833	250.193	0.057	0.04	1.14									31698370	43915	896.937	1.243	41744	1.181	0.0007	1418.5	tests performed	47627391	24665104	22581545	380742	90937	47733	134.77	69.79	63.9	1.08	1351	12628	0.036	75.93	35340680	15.322
SAU	Asia	Saudi Arabia	2021-12-05	549912	35	31	8844	2	1.571	15560.3	0.99	0.877	250.25	0.057	0.044	1.18									31741301	42931	898.152	1.215	41633	1.178	0.0007	1343	tests performed	47701071	24684104	22620922	396046	73680	55986	134.97	69.85	64.01	1.12	1584	14618	0.041	75.93	35340680	15.322
SAU	Asia	Saudi Arabia	2021-12-06	549955	43	33.571	8845	1	1.571	15561.5	1.217	0.95	250.278	0.028	0.044	1.22									31787409	46108	899.457	1.305	41894	1.185	0.0008	1247.9	tests performed	47766580	24701843	22654356	410381	65509	53563	135.16	69.9	64.1	1.16	1516	13787	0.039	75.93	35340680	15.322
SAU	Asia	Saudi Arabia	2021-12-07	549997	42	35	8847	2	1.571	15562.7	1.188	0.99	250.335	0.057	0.044	1.25									31825816	38407	900.543	1.087	41369	1.171	0.0008	1182	tests performed	47831664	24718878	22684981	427836	65084	55266	135.34	69.94	64.19	1.21	1564	14231	0.04	75.93	35340680	15.322
SAU	Asia	Saudi Arabia	2021-12-08	550043	46	36.714	8849	2	1.714	15564	1.302	1.039	250.391	0.057	0.049	1.29									31867094	41278	901.711	1.168	42416	1.2	0.0009	1155.3	tests performed	47897131	24736637	22715883	444617	65467	63893	135.53	69.99	64.28	1.26	1808	16524	0.047	75.93	35340680	15.322
SAU	Asia	Saudi Arabia	2021-12-09	550088	45	39.714	8850	1	1.571	15565.3	1.273	1.124	250.42	0.028	0.044	1.33									31908463	41369	902.882	1.171	42560	1.204	0.0009	1071.7	tests performed	47957035	24751433	22743817	461791	59904	66267	135.7	70.04	64.36	1.31	1875	17049	0.048	75.93	35340680	15.322
SAU	Asia	Saudi Arabia	2021-12-10	550136	48	41.143	8851	1	1.571	15566.6	1.358	1.164	250.448	0.028	0.044	1.37									31942358	33895	903.841	0.959	41129	1.164	0.001	999.7	tests performed	47983970	24757408	22755094	471468	26935	63931	135.78	70.05	64.39	1.33	1809	16314	0.046	75.93	35340680	15.322
SAU	Asia	Saudi Arabia	2021-12-11	550189	53	44.571	8852	1	1.429	15568.1	1.5	1.261	250.476	0.028	0.04	1.42									31980191	37833	904.912	1.071	40260	1.139	0.0011	903.3	tests performed	48023170	24766927	22771497	484746	39200	56540	135.89	70.08	64.43	1.37	1600	14546	0.041	75.93	35340680	15.322
SAU	Asia	Saudi Arabia	2021-12-12	550240	51	46.857	8853	1	1.286	15569.6	1.443	1.326	250.505	0.028	0.036	1.46									32016896	36705	905.95	1.039	39371	1.114	0.0012	840.2	tests performed	48088092	24786057	22801826	500209	64922	55289	136.07	70.13	64.52	1.42	1564	14565	0.041	75.93	35340680	15.322
SAU	Asia	Saudi Arabia	2021-12-13	550304	64	49.857	8855	2	1.429	15571.4	1.811	1.411	250.561	0.057	0.04	1.5									32066964	50068	907.367	1.417	39936	1.13	0.0012	801	tests performed	48104477	24791173	22809730	503574	16385	48271	136.12	70.15	64.54	1.42	1366	12761	0.036	75.93	35340680	15.322
SAU	Asia	Saudi Arabia	2021-12-14	550369	65	53.143	8856	1	1.286	15573.2	1.839	1.504	250.589	0.028	0.036	1.54									32123480	56516	908.966	1.599	42523	1.203	0.0012	800.2	tests performed	48186500	24815793	22848054	522683	82023	50691	136.35	70.22	64.65	1.48	1434	13845	0.039	75.93	35340680	15.322
SAU	Asia	Saudi Arabia	2021-12-15	550457	88	59.143	8857	1	1.143	15575.7	2.49	1.674	250.618	0.028	0.032	1.6									32183531	60051	910.665	1.699	45205	1.279	0.0013	764.3	tests performed	48231779	24829534	22867825	534462	45279	47807	136.48	70.26	64.71	1.51	1353	13271	0.038	75.93	35340680	15.322
SAU	Asia	Saudi Arabia	2021-12-16	550542	85	64.857	8858	1	1.143	15578.1	2.405	1.835	250.646	0.028	0.032	1.65									32250028	66497	912.547	1.882	48795	1.381	0.0013	752.3	tests performed	48275299	24841260	22887340	546718	43520	45466	136.6	70.29	64.76	1.55	1287	12832	0.036	75.93	35340680	15.322
SAU	Asia	Saudi Arabia	2021-12-17	550622	80	69.429	8860	2	1.286	15580.4	2.264	1.965	250.703	0.057	0.036	1.7									32302267	52239	914.025	1.478	51416	1.455	0.0014	740.6	tests performed	48293632	24845946	22895205	552481	18333	44237	136.65	70.3	64.78	1.56	1252	12648	0.036	75.93	35340680	15.322
SAU	Asia	Saudi Arabia	2021-12-18	550738	116	78.429	8861	1	1.286	15583.7	3.282	2.219	250.731	0.028	0.036	1.76									32362387	60120	915.726	1.701	54599	1.545	0.0014	696.2	tests performed	48322955	24854157	22908284	560514	29323	42826	136.73	70.33	64.82	1.59	1212	12461	0.035	75.93	35340680	15.322
SAU	Asia	Saudi Arabia	2021-12-19	550842	104	86	8862	1	1.286	15586.6	2.943	2.433	250.759	0.028	0.036	1.82									32413727	51340	917.179	1.453	56690	1.604	0.0015	659.2	tests performed	48381592	24872178	22935782	573632	58637	41929	136.9	70.38	64.9	1.62	1186	12303	0.035	75.93	35340680	15.322
SAU	Asia	Saudi Arabia	2021-12-20	550988	146	97.714	8864	2	1.286	15590.8	4.131	2.765	250.816	0.057	0.036	1.88									32471081	57354	918.802	1.623	57731	1.634	0.0017	590.8	tests performed	48475448	24887008	22958830	629610	93856	52996	137.17	70.42	64.96	1.78	1500	13691	0.039	75.93	35340680	15.322
SAU	Asia	Saudi Arabia	2021-12-21	551210	222	120.143	8865	1	1.286	15597	6.282	3.4	250.844	0.028	0.036	1.93									32536750	65669	920.66	1.858	59039	1.671	0.002	491.4	tests performed	48645367	24897852	22978924	768591	169919	65552	137.65	70.45	65.02	2.17	1855	11723	0.033	75.93	35340680	15.322
SAU	Asia	Saudi Arabia	2021-12-22	551462	252	143.571	8867	2	1.429	15604.2	7.131	4.062	250.901	0.057	0.04	1.97									32600487	63737	922.463	1.804	59565	1.685	0.0024	414.9	tests performed	48865162	24911957	23002106	951099	219795	90483	138.27	70.49	65.09	2.69	2560	11775	0.033	75.93	35340680	15.322
SAU	Asia	Saudi Arabia	2021-12-23	551749	287	172.429	8868	1	1.429	15612.3	8.121	4.879	250.929	0.028	0.04	2.01									32678701	78214	924.677	2.213	61239	1.733	0.0028	355.2	tests performed	49111269	24927717	23027139	1156413	246107	119424	138.97	70.54	65.16	3.27	3379	12351	0.035	75.93	35340680	15.322
SAU	Asia	Saudi Arabia	2021-12-24	552081	332	208.429	8869	1	1.286	15621.7	9.394	5.898	250.957	0.028	0.036	2.03									32743008	64307	926.496	1.82	62963	1.782	0.0033	302.1	tests performed	49253475	24933604	23037070	1282801	142206	137120	139.37	70.55	65.19	3.63	3880	12523	0.035	75.93	35340680	15.322
SAU	Asia	Saudi Arabia	2021-12-25	552406	325	238.286	8870	1	1.286	15630.9	9.196	6.743	250.986	0.028	0.036	2.05									32809383	66375	928.374	1.878	63857	1.807	0.0037	268	tests performed	49423248	24942157	23052006	1429085	169773	157185	139.85	70.58	65.23	4.04	4448	12571	0.036	75.93	35340680	15.322
SAU	Asia	Saudi Arabia	2021-12-26	552795	389	279	8871	1	1.286	15641.9	11.007	7.895	251.014	0.028	0.036	2.06									32885065	75682	930.516	2.141	67334	1.905	0.0041	241.3	tests performed	49700201	24958879	23078491	1662831	276953	188373	140.63	70.62	65.3	4.71	5330	12386	0.035	75.93	35340680	15.322
SAU	Asia	Saudi Arabia	2021-12-27	553319	524	333	8872	1	1.143	15656.7	14.827	9.423	251.042	0.028	0.032	2.08									32965869	80804	932.802	2.286	70684	2	0.0047	212.3	tests performed	49953753	24972309	23101362	1880082	253552	211186	141.35	70.66	65.37	5.32	5976	12186	0.034	75.93	35340680	15.322
SAU	Asia	Saudi Arabia	2021-12-28	553921	602	387.286	8873	1	1.143	15673.8	17.034	10.959	251.07	0.028	0.032	2.08									33049929	84060	935.181	2.379	73311	2.074	0.0053	189.3	tests performed	50215461	24986423	23125154	2103884	261708	224299	142.09	70.7	65.43	5.95	6347	12653	0.036	75.93	35340680	15.322
SAU	Asia	Saudi Arabia	2021-12-29	554665	744	457.571	8874	1	1	15694.8	21.052	12.947	251.099	0.028	0.028	2.09									33134497	84568	937.574	2.393	76287	2.159	0.006	166.7	tests performed	50477457	25000071	23148114	2329272	261996	230328	142.83	70.74	65.5	6.59	6517	12588	0.036	75.93	35340680	15.322
SAU	Asia	Saudi Arabia	2021-12-30	555417	752	524	8875	1	1	15716.1	21.279	14.827	251.127	0.028	0.028	2.1									33229844	95347	940.272	2.698	78735	2.228	0.0067	150.3	tests performed	50755660	25011556	23171018	2573086	278203	234913	143.62	70.77	65.56	7.28	6647	11977	0.034	75.93	35340680	15.322
SAU	Asia	Saudi Arabia	2021-12-31	556236	819	593.571	8877	2	1.143	15739.3	23.174	16.796	251.184	0.057	0.032	2.11									33310519	80675	942.555	2.283	81073	2.294	0.0073	136.6	tests performed	50894142	25017090	23180879	2696173	138482	234381	144.01	70.79	65.59	7.63	6632	11927	0.034	75.93	35340680	15.322
SAU	Asia	Saudi Arabia	2022-01-01	557082	846	668	8878	1	1.143	15763.2	23.938	18.902	251.212	0.028	0.032	2.12									33396224	85705	944.98	2.425	83834	2.372	0.008	125.5	tests performed	51031649	25023844	23191521	2816284	137507	229772	144.4	70.81	65.62	7.97	6502	11670	0.033	75.93	35340680	15.322
SAU	Asia	Saudi Arabia	2022-01-02	558106	1024	758.714	8879	1	1.143	15792.2	28.975	21.469	251.24	0.028	0.032	2.14									33501652	105428	947.963	2.983	88084	2.492	0.0086	116.1	tests performed	51262028	25038977	23215439	3007807	230379	223118	145.05	70.85	65.69	8.51	6313	11443	0.032	75.93	35340680	15.322
SAU	Asia	Saudi Arabia	2022-01-03	559852	1746	933.286	8881	2	1.286	15841.6	49.405	26.408	251.297	0.057	0.036	2.16									33623374	121722	951.407	3.444	93929	2.658	0.0099	100.6	tests performed	51493736	25053073	23239344	3201319	231708	219998	145.71	70.89	65.76	9.06	6225	11538	0.033	75.93	35340680	15.322
SAU	Asia	Saudi Arabia	2022-01-04	562437	2585	1216.57	8883	2	1.429	15914.7	73.145	34.424	251.353	0.057	0.04	2.16									33751227	127853	955.025	3.618	100185	2.835	0.0121	82.4	tests performed	51731312	25064537	23261014	3405761	237576	216550	146.38	70.92	65.82	9.64	6127	11159	0.032	75.93	35340680	15.322
SAU	Asia	Saudi Arabia	2022-01-05	565482	3045	1545.29	8886	3	1.714	16000.9	86.161	43.725	251.438	0.085	0.049	2.14									33885624	134397	958.828	3.803	107304	3.036	0.0144	69.4	tests performed	51965922	25078227	23282850	3604845	234610	212638	147.04	70.96	65.88	10.2	6017	11165	0.032	75.93	35340680	15.322
SAU	Asia	Saudi Arabia	2022-01-06	568650	3168	1890.43	8888	2	1.857	16090.5	89.642	53.492	251.495	0.057	0.053	2.09									34036677	151053	963.102	4.274	115262	3.261	0.0164	61	tests performed	52214828	25090342	23303260	3821226	248906	208453	147.75	71	65.94	10.81	5898	11255	0.032	75.93	35340680	15.322
SAU	Asia	Saudi Arabia	2022-01-07	572225	3575	2284.14	8890	2	1.857	16191.7	101.158	64.632	251.551	0.057	0.053	2.03									34161969	125292	966.647	3.545	121636	3.442	0.0188	53.3	tests performed	52329266	25095867	23311852	3921547	114438	205018	148.07	71.01	65.96	11.1	5801	11254	0.032	75.93	35340680	15.322
SAU	Asia	Saudi Arabia	2022-01-08	575293	3068	2601.57	8892	2	2	16278.5	86.812	73.614	251.608	0.057	0.057	1.97									34286232	124263	970.163	3.516	127144	3.598	0.0205	48.9	tests performed	52468417	25103177	23323598	4041739	139151	205253	148.46	71.03	66	11.44	5808	11333	0.032	75.93	35340680	15.322
SAU	Asia	Saudi Arabia	2022-01-09	578753	3460	2949.57	8893	1	2	16376.4	97.904	83.461	251.636	0.028	0.057	1.9									34414650	128418	973.797	3.634	130428	3.691	0.0226	44.2	tests performed	52689404	25120095	23346936	4222373	220987	203911	149.09	71.08	66.06	11.95	5770	11588	0.033	75.93	35340680	15.322
SAU	Asia	Saudi Arabia	2022-01-10	583531	4778	3382.71	8895	2	2	16511.6	135.198	95.717	251.693	0.057	0.057	1.84									34567571	152921	978.124	4.327	134885	3.817	0.0251	39.9	tests performed	52900314	25135435	23368690	4396189	210910	200940	149.69	71.12	66.12	12.44	5686	11766	0.033	75.93	35340680	15.322
SAU	Asia	Saudi Arabia	2022-01-11	588183	4652	3678	8897	2	2	16643.2	131.633	104.073	251.75	0.057	0.057	1.78									34728160	160589	982.668	4.544	139562	3.949	0.0264	37.9	tests performed	53099212	25151615	23390648	4556949	198898	195414	150.25	71.17	66.19	12.89	5529	12440	0.035	75.93	35340680	15.322
SAU	Asia	Saudi Arabia	2022-01-12	593545	5362	4009	8899	2	1.857	16795	151.723	113.439	251.806	0.057	0.053	1.72									34885540	157380	987.121	4.453	142845	4.042	0.0281	35.6	tests performed	53314310	25165017	23410643	4738650	215098	192627	150.86	71.21	66.24	13.41	5451	12399	0.035	75.93	35340680	15.322
SAU	Asia	Saudi Arabia	2022-01-13	599044	5499	4342	8901	2	1.857	16950.6	155.6	122.861	251.863	0.057	0.053	1.66									35050746	165206	991.796	4.675	144867	4.099	0.03	33.4	tests performed	53533993	25177869	23430259	4925865	219683	188452	151.48	71.24	66.3	13.94	5332	12504	0.035	75.93	35340680	15.322
SAU	Asia	Saudi Arabia	2022-01-14	604672	5628	4635.29	8903	2	1.857	17109.8	159.25	131.16	251.919	0.057	0.053	1.6									35198422	147676	995.975	4.179	148065	4.19	0.0313	31.9	tests performed	53656569	25183145	23439432	5033992	122576	189615	151.83	71.26	66.32	14.24	5365	12468	0.035	75.93	35340680	15.322
SAU	Asia	Saudi Arabia	2022-01-15	609953	5281	4951.43	8905	2	1.857	17259.2	149.431	140.106	251.976	0.057	0.053	1.53									35353849	155427	1000.37	4.398	152517	4.316	0.0325	30.8	tests performed	53802512	25191155	23450290	5161067	145943	190585	152.24	71.28	66.35	14.6	5393	12568	0.036	75.93	35340680	15.322
SAU	Asia	Saudi Arabia	2022-01-16	615430	5477	5239.57	8906	1	1.857	17414.2	154.977	148.259	252.004	0.028	0.053	1.47									35530512	176663	1005.37	4.999	159409	4.511	0.0329	30.4	tests performed	53990391	25206693	23469793	5313905	187879	185855	152.77	71.32	66.41	15.04	5259	12371	0.035	75.93	35340680	15.322
SAU	Asia	Saudi Arabia	2022-01-17	620935	5505	5343.43	8908	2	1.857	17570	155.769	151.198	252.061	0.057	0.053	1.4									35722998	192486	1010.82	5.447	165061	4.671	0.0324	30.9	tests performed	54190407	25220729	23487465	5482213	200016	184299	153.34	71.36	66.46	15.51	5215	12185	0.034	75.93	35340680	15.322
SAU	Asia	Saudi Arabia	2022-01-18	626808	5873	5517.86	8910	2	1.857	17736.2	166.182	156.133	252.117	0.057	0.053	1.35									35935167	212169	1016.82	6.004	172430	4.879	0.032	31.2	tests performed	54365950	25233658	23502788	5629504	175543	180963	153.83	71.4	66.5	15.93	5121	11720	0.033	75.93	35340680	15.322
SAU	Asia	Saudi Arabia	2022-01-19	632736	5928	5598.71	8912	2	1.857	17903.9	167.739	158.421	252.174	0.057	0.053	1.29									36147998	212831	1022.84	6.022	180351	5.103	0.031	32.2	tests performed	54597568	25275319	23519253	5802996	231618	183323	154.49	71.52	66.55	16.42	5187	15757	0.045	75.93	35340680	15.322
SAU	Asia	Saudi Arabia	2022-01-20	638327	5591	5611.86	8914	2	1.857	18062.1	158.203	158.793	252.231	0.057	0.053	1.24									36352055	204057	1028.62	5.774	185901	5.26	0.0302	33.1	tests performed						169351					4792	16545	0.047	75.93	35340680	15.322
SAU	Asia	Saudi Arabia	2022-01-21	643211	4884	5505.57	8916	2	1.857	18200.3	138.198	155.786	252.287	0.057	0.053	1.2									36494942	142887	1032.66	4.043	185217	5.241	0.0297	33.6	tests performed	54841337	25312053	23533435	5995849		169253	155.18	71.62	66.59	16.97	4789	18415	0.052	75.93	35340680	15.322
SAU	Asia	Saudi Arabia	2022-01-22	647819	4608	5409.43	8918	2	1.857	18330.7	130.388	153.065	252.344	0.057	0.053	1.16									36626704	131762	1036.39	3.728	181836	5.145	0.0297	33.6	tests performed						191865					5429	23130	0.065	75.93	35340680	15.322
SAU	Asia	Saudi Arabia	2022-01-23	652354	4535	5274.86	8920	2	2	18459	128.322	149.257	252.4	0.057	0.057	1.12									36791838	165134	1041.06	4.673	180189	5.099	0.0293	34.2	tests performed	55449797	25394077	23568074	6487646		208487	156.9	71.86	66.69	18.36	5899	26769	0.076	75.93	35340680	15.322
SAU	Asia	Saudi Arabia	2022-01-24	657192	4838	5179.57	8922	2	2	18595.9	136.896	146.561	252.457	0.057	0.057	1.08									36959727	167889	1045.81	4.751	176676	4.999	0.0293	34.1	tests performed	55764235	25427237	23592602	6744396	314438	224833	157.79	71.95	66.76	19.08	6362	29501	0.083	75.93	35340680	15.322
SAU	Asia	Saudi Arabia	2022-01-25	661733	4541	4989.29	8924	2	2	18724.4	128.492	141.177	252.514	0.057	0.057	1.05									37149074	189347	1051.17	5.358	173415	4.907	0.0288	34.8	tests performed	56009853	25450523	23611131	6948199	245618	234843	158.49	72.01	66.81	19.66	6645	30981	0.088	75.93	35340680	15.322
SAU	Asia	Saudi Arabia	2022-01-26	666259	4526	4789	8927	3	2.143	18852.5	128.068	135.51	252.598	0.085	0.061	1.02									37312851	163777	1055.81	4.634	166408	4.709	0.0288	34.7	tests performed	56257654	25475646	23630622	7151386	247801	237155	159.19	72.09	66.87	20.24	6711	28618	0.081	75.93	35340680	15.322
SAU	Asia	Saudi Arabia	2022-01-27	670997	4738	4667.14	8929	2	2.143	18986.5	134.066	132.061	252.655	0.057	0.061	1									37465280	152429	1060.12	4.313	159032	4.5	0.0293	34.1	tests performed	56520251	25501361	23647878	7371012	262597	257257	159.93	72.16	66.91	20.86	7279	29668	0.084	75.93	35340680	15.322
SAU	Asia	Saudi Arabia	2022-01-28	675471	4474	4608.57	8931	2	2.143	19113.1	126.596	130.404	252.712	0.057	0.061	0.98									37596846	131566	1063.84	3.723	157415	4.454	0.0293	34.2	tests performed	56661925	25515383	23655344	7491198	141674	260084	160.33	72.2	66.94	21.2	7359	29047	0.082	75.93	35340680	15.322
SAU	Asia	Saudi Arabia	2022-01-29	679384	3913	4509.29	8933	2	2.143	19223.9	110.722	127.595	252.768	0.057	0.061	0.96									37726564	129718	1067.51	3.671	157123	4.446	0.0287	34.8	tests performed	56707289	25517272	23656978	7533039	45364	223103	160.46	72.2	66.94	21.32	6313	23458	0.066	75.93	35340680	15.322
SAU	Asia	Saudi Arabia	2022-01-30	683053	3669	4385.57	8936	3	2.286	19327.7	103.818	124.094	252.853	0.085	0.065	0.94									37872209	145645	1071.63	4.121	154339	4.367	0.0284	35.2	tests performed						224007					6339	20776	0.059	75.93	35340680	15.322
SAU	Asia	Saudi Arabia	2022-01-31	687264	4211	4296	8940	4	2.571	19446.8	119.154	121.56	252.966	0.113	0.073	0.92									38017744	145535	1075.75	4.118	151145	4.277	0.0284	35.2	tests performed	57328405	25561741	23699933	8066731		223453	162.22	72.33	67.06	22.83	6323	19215	0.054	75.93	35340680	15.322
SAU	Asia	Saudi Arabia	2022-02-01	691125	3861	4198.86	8941	1	2.429	19556.1	109.251	118.811	252.995	0.028	0.069	0.9									38166414	148670	1079.96	4.207	145334	4.112	0.0289	34.6	tests performed	57588459	25583119	23720161	8285179	260054	225515	162.95	72.39	67.12	23.44	6381	18942	0.054	75.93	35340680	15.322
SAU	Asia	Saudi Arabia	2022-02-02	695217	4092	4136.86	8943	2	2.286	19671.9	115.787	117.057	253.051	0.057	0.065	0.89									38309090	142676	1083.99	4.037	142320	4.027	0.0291	34.4	tests performed	57852000	25606327	23742157	8503516	263541	227764	163.7	72.46	67.18	24.06	6445	18669	0.053	75.93	35340680	15.322
SAU	Asia	Saudi Arabia	2022-02-03	699069	3852	4010.29	8947	4	2.571	19780.9	108.996	113.475	253.164	0.113	0.073	0.87									38442632	133542	1087.77	3.779	139622	3.951	0.0287	34.8	tests performed	58095578	25624833	23763036	8707709	243578	225047	164.39	72.51	67.24	24.64	6368	17639	0.05	75.93	35340680	15.322
SAU	Asia	Saudi Arabia	2022-02-04	702624	3555	3879	8950	3	2.714	19881.5	100.592	109.76	253.249	0.085	0.077	0.86									38555878	113246	1090.98	3.204	137005	3.877	0.0283	35.3	tests performed	58227893	25634695	23772644	8820554	132315	223710	164.76	72.54	67.27	24.96	6330	17045	0.048	75.93	35340680	15.322
SAU	Asia	Saudi Arabia	2022-02-05	705637	3013	3750.43	8953	3	2.857	19966.7	85.256	106.122	253.334	0.085	0.081	0.84									38678224	122346	1094.44	3.462	135951	3.847	0.0276	36.2	tests performed	58383621	25646719	23785581	8951321	155728	239476	165.2	72.57	67.3	25.33	6776	18492	0.052	75.93	35340680	15.322
SAU	Asia	Saudi Arabia	2022-02-06	708897	3260	3692	8954	1	2.571	20059	92.245	104.469	253.362	0.028	0.073	0.82									38814099	135875	1098.28	3.845	134556	3.807	0.0274	36.4	tests performed	58565764	25665576	23808373	9091815	182143	221131	165.72	72.62	67.37	25.73	6257	18010	0.051	75.93	35340680	15.322
SAU	Asia	Saudi Arabia	2022-02-07	712644	3747	3625.71	8957	3	2.429	20165	106.025	102.593	253.447	0.085	0.069	0.81									38945796	131697	1102.01	3.726	132579	3.751	0.0273	36.6	tests performed	58732880	25684649	23832585	9215646	167116	200639	166.19	72.68	67.44	26.08	5677	17558	0.05	75.93	35340680	15.322
SAU	Asia	Saudi Arabia	2022-02-08	715974	3330	3549.86	8959	2	2.571	20259.2	94.226	100.447	253.504	0.057	0.073	0.79									39073688	127892	1105.63	3.619	129611	3.667	0.0274	36.5	tests performed	58874867	25701282	23851894	9321691	141987	183773	166.59	72.72	67.49	26.38	5200	16880	0.048	75.93	35340680	15.322
SAU	Asia	Saudi Arabia	2022-02-09	719136	3162	3417	8962	3	2.714	20348.7	89.472	96.687	253.589	0.085	0.077	0.77									39196567	122879	1109.11	3.477	126782	3.587	0.027	37.1	tests performed	59011582	25717194	23869335	9425053	136715	165655	166.98	72.77	67.54	26.67	4687	15838	0.045	75.93	35340680	15.322
SAU	Asia	Saudi Arabia	2022-02-10	722002	2866	3276.14	8965	3	2.571	20429.8	81.096	92.702	253.674	0.085	0.073	0.75									39312767	116200	1112.39	3.288	124305	3.517	0.0264	37.9	tests performed	59183197	25734650	23890532	9558015	171615	155374	167.46	72.82	67.6	27.05	4396	15688	0.044	75.93	35340680	15.322
SAU	Asia	Saudi Arabia	2022-02-11	724525	2523	3128.71	8969	4	2.714	20501.2	71.391	88.53	253.787	0.113	0.077	0.72									39400621	87854	1114.88	2.486	120678	3.415	0.0259	38.6	tests performed	59262585	25742662	23901010	9618913	79388	147813	167.69	72.84	67.63	27.22	4183	15424	0.044	75.93	35340680	15.322
SAU	Asia	Saudi Arabia	2022-02-12	726251	1726	2944.86	8971	2	2.571	20550	48.839	83.328	253.843	0.057	0.073	0.7									39500111	99490	1117.69	2.815	117412	3.322	0.0251	39.9	tests performed	59362397	25752949	23915410	9694038	99812	139825	167.97	72.87	67.67	27.43	3956	15176	0.043	75.93	35340680	15.322
SAU	Asia	Saudi Arabia	2022-02-13	728387	2136	2784.29	8973	2	2.714	20610.4	60.44	78.784	253.9	0.057	0.077	0.68									39604333	104222	1120.64	2.949	112891	3.194	0.0247	40.5	tests performed	59508036	25771538	23938736	9797762	145639	134610	168.38	72.92	67.74	27.72	3809	15137	0.043	75.93	35340680	15.322
SAU	Asia	Saudi Arabia	2022-02-14	730614	2227	2567.14	8974	1	2.429	20673.5	63.015	72.64	253.928	0.028	0.069	0.66									39714549	110216	1123.76	3.119	109822	3.108	0.0234	42.8	tests performed	59639202	25788728	23960204	9890270	131166	129475	168.76	72.97	67.8	27.99	3664	14868	0.042	75.93	35340680	15.322
SAU	Asia	Saudi Arabia	2022-02-15	732596	1982	2374.57	8975	1	2.286	20729.5	56.083	67.191	253.957	0.028	0.065	0.64									39813934	99385	1126.58	2.812	105749	2.992	0.0225	44.5	tests performed	59759376	25804555	23980248	9974573	120174	126358	169.1	73.02	67.85	28.22	3575	14753	0.042	75.93	35340680	15.322
SAU	Asia	Saudi Arabia	2022-02-16	734389	1793	2179	8977	2	2.143	20780.3	50.735	61.657	254.013	0.057	0.061	0.62									39911922	97988	1129.35	2.773	102194	2.892	0.0213	46.9	tests performed	59873655	25819197	23999570	10054888	114279	123153	169.42	73.06	67.91	28.45	3485	14572	0.041	75.93	35340680	15.322
SAU	Asia	Saudi Arabia	2022-02-17	735958	1569	1993.71	8978	1	1.857	20824.7	44.396	56.414	254.042	0.028	0.053	0.6									40005414	93492	1131.99	2.645	98950	2.8	0.0201	49.6	tests performed	60010342	25833841	24021169	10155332	136687	118164	169.81	73.1	67.97	28.74	3344	14170	0.04	75.93	35340680	15.322
SAU	Asia	Saudi Arabia	2022-02-18	737334	1376	1829.86	8981	3	1.714	20863.6	38.935	51.778	254.126	0.085	0.049	0.58									40081083	75669	1134.13	2.141	97209	2.751	0.0188	53.1	tests performed	60077779	25841103	24033572	10203104	67437	116456	170	73.12	68.01	28.87	3295	14063	0.04	75.93	35340680	15.322
SAU	Asia	Saudi Arabia	2022-02-19	738331	997	1725.71	8982	1	1.571	20891.8	28.211	48.831	254.155	0.028	0.044	0.57									40158791	77708	1136.33	2.199	94097	2.663	0.0183	54.5	tests performed	60150923	25849232	24045998	10255693	73144	112647	170.2	73.14	68.04	29.02	3187	13755	0.039	75.93	35340680	15.322
SAU	Asia	Saudi Arabia	2022-02-20	739344	1013	1565.29	8984	2	1.571	20920.5	28.664	44.291	254.211	0.057	0.044	0.55									40241874	83083	1138.68	2.351	91077	2.577	0.0172	58.2	tests performed	60268103	25865793	24067583	10334727	117180	108581	170.53	73.19	68.1	29.24	3072	13465	0.038	75.93	35340680	15.322
SAU	Asia	Saudi Arabia	2022-02-21	740396	1052	1397.43	8986	2	1.714	20950.2	29.767	39.542	254.268	0.057	0.049	0.53									40321585	79711	1140.94	2.256	86719	2.454	0.0161	62.1	tests performed	60372816	25880963	24088081	10403772	104713	104802	170.83	73.23	68.16	29.44	2965	13176	0.037	75.93	35340680	15.322
SAU	Asia	Saudi Arabia	2022-02-22	741237	841	1234.43	8987	1	1.714	20974	23.797	34.929	254.296	0.028	0.049	0.52									40382502	60917	1142.66	1.724	81224	2.298	0.0152	65.8	tests performed	60412101	25886893	24096952	10428256	39285	93246	170.94	73.25	68.18	29.51	2638	11763	0.033	75.93	35340680	15.322
SAU	Asia	Saudi Arabia	2022-02-23	741864	627	1067.86	8990	3	1.857	20991.8	17.742	30.216	254.381	0.085	0.053	0.51									40449725	67223	1144.57	1.902	76829	2.174	0.0139	71.9	tests performed	60522804	25902645	24117741	10502418	110703	92736	171.26	73.29	68.24	29.72	2624	11921	0.034	75.93	35340680	15.322
SAU	Asia	Saudi Arabia	2022-02-24	742541	677	940.429	8991	1	1.857	21010.9	19.156	26.61	254.409	0.028	0.053	0.5									40519559	69834	1146.54	1.976	73449	2.078	0.0128	78.1	tests performed	60638822	25915788	24137624	10585410	116018	89783	171.58	73.33	68.3	29.95	2541	11707	0.033	75.93	35340680	15.322
SAU	Asia	Saudi Arabia	2022-02-25	743205	664	838.714	8993	2	1.714	21029.7	18.789	23.732	254.466	0.057	0.049	0.5									40578171	58612	1148.2	1.658	71013	2.009	0.0118	84.7	tests performed	60694353	25922731	24148197	10623425	55531	88082	171.74	73.35	68.33	30.06	2492	11661	0.033	75.93	35340680	15.322
SAU	Asia	Saudi Arabia	2022-02-26	743742	537	773	8994	1	1.714	21044.9	15.195	21.873	254.494	0.028	0.049	0.5									40641112	62941	1149.98	1.781	68903	1.95	0.0112	89.1	tests performed	60760198	25931515	24161007	10667676	65845	87039	171.93	73.38	68.37	30.19	2463	11755	0.033	75.93	35340680	15.322
SAU	Asia	Saudi Arabia	2022-02-27	744374	632	718.571	8996	2	1.714	21062.8	17.883	20.333	254.551	0.057	0.049	0.49									40704052	62940	1151.76	1.781	66025	1.868	0.0109	91.9	tests performed	60840610	25943822	24177054	10719734	80412	81787	172.15	73.41	68.41	30.33	2314	11147	0.032	75.93	35340680	15.322
SAU	Asia	Saudi Arabia	2022-02-28	745027	653	661.571	8998	2	1.714	21081.3	18.477	18.72	254.607	0.057	0.049	0.49									40769021	64969	1153.6	1.838	63919	1.809	0.0104	96.6	tests performed	60953969	25960748	24199236	10793985	113359	83022	172.48	73.46	68.47	30.54	2349	11398	0.032	75.93	35340680	15.322
SAU	Asia	Saudi Arabia	2022-03-01	745590	563	621.857	9001	3	2	21097.2	15.931	17.596	254.692	0.085	0.057	0.48									40829579	60558	1155.31	1.714	63868	1.807	0.0097	102.7	tests performed						84922					2403	11528	0.033	75.93	35340680	15.322
SAU	Asia	Saudi Arabia	2022-03-02	746066	476	600.286	9002	1	1.714	21110.7	13.469	16.986	254.721	0.028	0.049	0.47									40887817	58238	1156.96	1.648	62585	1.771	0.0096	104.3	tests performed						76620					2168	10255	0.029	75.93	35340680	15.322
SAU	Asia	Saudi Arabia	2022-03-03	746473	407	561.714	9004	2	1.857	21122.2	11.516	15.894	254.777	0.057	0.053	0.47									40943934	56117	1158.55	1.588	60625	1.715	0.0093	107.9	tests performed						67559					1912	9355	0.026	75.93	35340680	15.322
SAU	Asia	Saudi Arabia	2022-03-04	746836	363	518.714	9005	1	1.714	21132.5	10.271	14.678	254.806	0.028	0.049	0.46									40989691	45757	1159.84	1.295	58789	1.663	0.0088	113.3	tests performed						67139					1900	9340	0.026	75.93	35340680	15.322
SAU	Asia	Saudi Arabia	2022-03-05	747119	283	482.429	9006	1	1.714	21140.5	8.008	13.651	254.834	0.028	0.049	0.46									41039706	50015	1161.26	1.415	56942	1.611	0.0085	118	tests performed						65245					1846	9062	0.026	75.93	35340680	15.322
SAU	Asia	Saudi Arabia	2022-03-06	747436	317	437.429	9008	2	1.714	21149.5	8.97	12.377	254.89	0.057	0.049	0.45									41081211	41505	1162.43	1.174	53880	1.525	0.0081	123.2	tests performed						61270					1734	8282	0.023	75.93	35340680	15.322
SAU	Asia	Saudi Arabia	2022-03-07	747715	279	384	9009	1	1.571	21157.3	7.895	10.866	254.919	0.028	0.044	0.44									41112600	31389	1163.32	0.888	49083	1.389	0.0078	127.8	tests performed						52589					1488	6841	0.019	75.93	35340680	15.322
SAU	Asia	Saudi Arabia	2022-03-08	747934	219	334.857	9011	2	1.429	21163.5	6.197	9.475	254.975	0.057	0.04	0.44									41140513	27913	1164.11	0.79	44419	1.257	0.0075	132.7	tests performed						52589					1488	6841	0.019	67.59	35340680	15.322
SAU	Asia	Saudi Arabia	2022-03-09	748121	187	293.571	9013	2	1.571	21168.8	5.291	8.307	255.032	0.057	0.044	0.44									41168491	27978	1164.9	0.792	40096	1.135	0.0073	136.6	tests performed						52589					1488	6841	0.019	67.59	35340680	15.322
SAU	Asia	Saudi Arabia	2022-03-10	748311	190	262.571	9014	1	1.429	21174.2	5.376	7.43	255.06	0.028	0.04	0.44									41197847	29356	1165.73	0.831	36273	1.026	0.0072	138.1	tests performed						52589					1488	6841	0.019	67.59	35340680	15.322
SAU	Asia	Saudi Arabia	2022-03-11	748489	178	236.143	9016	2	1.571	21179.2	5.037	6.682	255.117	0.057	0.044	0.45									41219077	21230	1166.34	0.601	32769	0.927	0.0072	138.8	tests performed						52589					1488	6841	0.019	67.59	35340680	15.322
SAU	Asia	Saudi Arabia	2022-03-12	748624	135	215	9017	1	1.571	21183.1	3.82	6.084	255.145	0.028	0.044	0.46									41240852	21775	1166.95	0.616	28735	0.813	0.0075	133.7	tests performed						52589					1488	6841	0.019	67.59	35340680	15.322
SAU	Asia	Saudi Arabia	2022-03-13	748769	145	190.429	9018	1	1.429	21187.2	4.103	5.388	255.173	0.028	0.04	0.46									41263565	22713	1167.59	0.643	26051	0.737	0.0073	136.8	tests performed						52589					1488	6841	0.019	67.59	35340680	15.322
SAU	Asia	Saudi Arabia	2022-03-14	748915	146	171.429	9020	2	1.571	21191.3	4.131	4.851	255.23	0.057	0.044	0.47									41284790	21225	1168.19	0.601	24599	0.696	0.007	143.5	tests performed						52589					1488	6841	0.019	67.59	35340680	15.322
SAU	Asia	Saudi Arabia	2022-03-15	749044	129	158.571	9021	1	1.429	21195	3.65	4.487	255.258	0.028	0.04	0.48									41304165	19375	1168.74	0.548	23379	0.662	0.0068	147.4	tests performed						52589					1488	6841	0.019	67.59	35340680	15.322
SAU	Asia	Saudi Arabia	2022-03-16	749171	127	150	9023	2	1.429	21198.5	3.594	4.244	255.315	0.057	0.04	0.5									41320890	16725	1169.22	0.473	21771	0.616	0.0069	145.1	tests performed						52589					1488	6841	0.019	67.59	35340680	15.322
SAU	Asia	Saudi Arabia	2022-03-17	749268	97	136.714	9024	1	1.429	21201.3	2.745	3.868	255.343	0.028	0.04	0.51									41338059	17169	1169.7	0.486	20030	0.567	0.0068	146.5	tests performed						52589					1488	6841	0.019	67.59	35340680	15.322
SAU	Asia	Saudi Arabia	2022-03-18	749373	105	126.286	9025	1	1.286	21204.3	2.971	3.573	255.371	0.028	0.036	0.53									41352246	14187	1170.1	0.401	19024	0.538	0.0066	150.6	tests performed						52589					1488	6841	0.019	67.59	35340680	15.322
SAU	Asia	Saudi Arabia	2022-03-19	749471	98	121	9027	2	1.429	21207	2.773	3.424	255.428	0.057	0.04	0.56									41370138	17892	1170.61	0.506	18469	0.523	0.0066	152.6	tests performed						52589					1488	6841	0.019	67.59	35340680	15.322
SAU	Asia	Saudi Arabia	2022-03-20	749597	126	118.286	9028	1	1.429	21210.6	3.565	3.347	255.456	0.028	0.04	0.58									41387358	17220	1171.1	0.487	17685	0.5	0.0067	149.5	tests performed						52589					1488	6841	0.019	67.59	35340680	15.322
SAU	Asia	Saudi Arabia	2022-03-21	749730	133	116.429	9030	2	1.429	21214.4	3.763	3.294	255.513	0.057	0.04	0.6									41404463	17105	1171.58	0.484	17096	0.484	0.0068	146.8	tests performed						52589					1488	6841	0.019	67.59	35340680	15.322
SAU	Asia	Saudi Arabia	2022-03-22	749855	125	115.857	9032	2	1.571	21217.9	3.537	3.278	255.57	0.057	0.044	0.62									41421261	16798	1172.06	0.475	16728	0.473	0.0069	144.4	tests performed						52589					1488	6841	0.019	67.59	35340680	15.322
SAU	Asia	Saudi Arabia	2022-03-23	749965	110	113.429	9033	1	1.429	21221	3.113	3.21	255.598	0.028	0.04	0.64									41436288	15027	1172.48	0.425	16485	0.466	0.0069	145.3	tests performed						52589					1488	6841	0.019	67.59	35340680	15.322
SAU	Asia	Saudi Arabia	2022-03-24	750080	115	116	9034	1	1.429	21224.3	3.254	3.282	255.626	0.028	0.04	0.66									41451248	14960	1172.9	0.423	16170	0.458	0.0072	139.4	tests performed						52589					1488	6841	0.019	67.59	35340680	15.322
SAU	Asia	Saudi Arabia	2022-03-25	750179	99	115.143	9036	2	1.571	21227.1	2.801	3.258	255.683	0.057	0.044	0.68									41462222	10974	1173.21	0.311	15711	0.445	0.0073	136.4	tests performed						52589					1488	6841	0.019	67.59	35340680	15.322
SAU	Asia	Saudi Arabia	2022-03-26	750258	79	112.429	9038	2	1.571	21229.3	2.235	3.181	255.739	0.057	0.044	0.7									41476336	14114	1173.62	0.399	15171	0.429	0.0074	134.9	tests performed						52589					1488	6841	0.019	67.59	35340680	15.322
SAU	Asia	Saudi Arabia	2022-03-27	750356	98	108.429	9039	1	1.571	21232.1	2.773	3.068	255.768	0.028	0.044	0.72									41492799	16463	1174.08	0.466	15063	0.426	0.0072	138.9	tests performed						52589					1488	6841	0.019	67.59	35340680	15.322
SAU	Asia	Saudi Arabia	2022-03-28	750483	127	107.571	9040	1	1.429	21235.7	3.594	3.044	255.796	0.028	0.04	0.75									41508671	15872	1174.53	0.449	14887	0.421	0.0072	138.4	tests performed						52589					1488	6841	0.019	67.59	35340680	15.322
SAU	Asia	Saudi Arabia	2022-03-29	750589	106	104.857	9042	2	1.429	21238.7	2.999	2.967	255.852	0.057	0.04	0.77									41524968	16297	1174.99	0.461	14815	0.419	0.0071	141.3	tests performed						52589					1488	6841	0.019	67.59	35340680	15.322
SAU	Asia	Saudi Arabia	2022-03-30	750707	118	106	9043	1	1.429	21242	3.339	2.999	255.881	0.028	0.04	0.78									41542574	17606	1175.49	0.498	15184	0.43	0.007	143.2	tests performed						52589					1488	6841	0.019	67.59	35340680	15.322
SAU	Asia	Saudi Arabia	2022-03-31	750814	107	104.857	9045	2	1.571	21245	3.028	2.967	255.937	0.057	0.044	0.8									41558711	16137	1175.94	0.457	15352	0.434	0.0068	146.4	tests performed						52589					1488	6841	0.019	67.59	35340680	15.322
SAU	Asia	Saudi Arabia	2022-04-01	750910	96	104.429	9046	1	1.429	21247.8	2.716	2.955	255.966	0.028	0.04	0.82									41568977	10266	1176.24	0.29	15251	0.432	0.0068	146	tests performed						52589					1488	6841	0.019	67.59	35340680	15.322
SAU	Asia	Saudi Arabia	2022-04-02	750998	88	105.714	9047	1	1.286	21250.2	2.49	2.991	255.994	0.028	0.036	0.84									41579921	10944	1176.55	0.31	14798	0.419	0.0071	140	tests performed						52589					1488	6841	0.019	67.59	35340680	15.322
SAU	Asia	Saudi Arabia	2022-04-03	751076	78	102.857	9048	1	1.286	21252.4	2.207	2.91	256.022	0.028	0.036	0.85									41592046	12125	1176.89	0.343	14178	0.401	0.0073	137.8	tests performed						52589					1488	6841	0.019	67.59	35340680	15.322
SAU	Asia	Saudi Arabia	2022-04-04	751180	104	99.571	9050	2	1.429	21255.4	2.943	2.817	256.079	0.057	0.04	0.87									41605651	13605	1177.27	0.385	13854	0.392	0.0072	139.1	tests performed						52589					1488	6841	0.019	67.59	35340680	15.322
SAU	Asia	Saudi Arabia	2022-04-05	751296	116	101	9050	0	1.143	21258.7	3.282	2.858	256.079	0	0.032	0.89									41618512	12861	1177.64	0.364	13363	0.378	0.0076	132.3	tests performed						52589					1488	6841	0.019	67.59	35340680	15.322
SAU	Asia	Saudi Arabia	2022-04-06	751404	108	99.571	9053	3	1.429	21261.7	3.056	2.817	256.164	0.085	0.04	0.91									41631441	12929	1178	0.366	12695	0.359	0.0078	127.5	tests performed						52589					1488	6841	0.019	67.59	35340680	15.322
SAU	Asia	Saudi Arabia	2022-04-07	751518	114	100.571	9054	1	1.286	21265	3.226	2.846	256.192	0.028	0.036	0.93									41643842	12401	1178.35	0.351	12162	0.344	0.0083	120.9	tests performed						52589					1488	6841	0.019	67.59	35340680	15.322
SAU	Asia	Saudi Arabia	2022-04-08	751622	104	101.714	9055	1	1.286	21267.9	2.943	2.878	256.22	0.028	0.036	0.94									41653980	10138	1178.64	0.287	12143	0.344	0.0084	119.4	tests performed						52589					1488	6841	0.019	67.59	35340680	15.322
SAU	Asia	Saudi Arabia	2022-04-09	751717	95	102.714	9055	0	1.143	21270.6	2.688	2.906	256.22	0	0.032	0.96									41664826	10846	1178.95	0.307	12129	0.343	0.0085	118.1	tests performed						52589					1488	6841	0.019	67.59	35340680	15.322
SAU	Asia	Saudi Arabia	2022-04-10	751813	96	105.286	9058	3	1.429	21273.3	2.716	2.979	256.305	0.085	0.04	0.97									41680662	15836	1179.4	0.448	12659	0.358	0.0083	120.2	tests performed						52589					1488	6841	0.019	67.59	35340680	15.322
SAU	Asia	Saudi Arabia	2022-04-11	751943	130	109	9058	0	1.143	21277	3.678	3.084	256.305	0	0.032	0.98									41693268	12606	1179.75	0.357	12517	0.354	0.0087	114.8	tests performed						52589					1488	6841	0.019	67.59	35340680	15.322
SAU	Asia	Saudi Arabia	2022-04-12	752078	135	111.714	9060	2	1.429	21280.8	3.82	3.161	256.362	0.057	0.04	0.98									41704690	11422	1180.08	0.323	12311	0.348	0.0091	110.2	tests performed						52589					1488	6841	0.019	67.59	35340680	15.322
SAU	Asia	Saudi Arabia	2022-04-13	752188	110	112	9062	2	1.286	21283.9	3.113	3.169	256.418	0.057	0.036	0.99									41716475	11785	1180.41	0.333	12148	0.344	0.0092	108.5	tests performed						52589					1488	6841	0.019	67.59	35340680	15.322
SAU	Asia	Saudi Arabia	2022-04-14	752291	103	110.429	9063	1	1.286	21286.8	2.914	3.125	256.447	0.028	0.036	0.99									41727951	11476	1180.73	0.325	12016	0.34	0.0092	108.8	tests performed						52589					1488	6841	0.019	67.59	35340680	15.322
SAU	Asia	Saudi Arabia	2022-04-15	752396	105	110.571	9066	3	1.571	21289.8	2.971	3.129	256.532	0.085	0.044	1									41737219	9268	1181	0.262	11891	0.336	0.0093	107.5	tests performed						52589					1488	6841	0.019	67.59	35340680	15.322
SAU	Asia	Saudi Arabia	2022-04-16	752479	83	108.857	9068	2	1.857	21292.1	2.349	3.08	256.588	0.057	0.053	1.01									41747395	10176	1181.28	0.288	11796	0.334	0.0092	108.4	tests performed						52589					1488	6841	0.019	67.59	35340680	15.322
SAU	Asia	Saudi Arabia	2022-04-17	752572	93	108.429	9069	1	1.571	21294.8	2.632	3.068	256.616	0.028	0.044	1.02									41759263	11868	1181.62	0.336	11229	0.318	0.0097	103.6	tests performed						52589					1488	6841	0.019	67.59	35340680	15.322
SAU	Asia	Saudi Arabia	2022-04-18	752705	133	108.857	9069	0	1.571	21298.5	3.763	3.08	256.616	0	0.044	1.03									41771765	12502	1181.97	0.354	11214	0.317	0.0097	103	tests performed						52589					1488	6841	0.019	67.59	35340680	15.322
SAU	Asia	Saudi Arabia	2022-04-19	752848	143	110	9072	3	1.714	21302.6	4.046	3.113	256.701	0.085	0.049	1.04									41783592	11827	1182.31	0.335	11272	0.319	0.0098	102.5	tests performed						52589					1488	6841	0.019	67.59	35340680	15.322
SAU	Asia	Saudi Arabia	2022-04-20	752994	146	115.143	9074	2	1.714	21306.7	4.131	3.258	256.758	0.057	0.049	1.05									41796829	13237	1182.68	0.375	11479	0.325	0.01	99.7	tests performed						52589					1488	6841	0.019	67.59	35340680	15.322
SAU	Asia	Saudi Arabia	2022-04-21	753124	130	119	9075	1	1.714	21310.4	3.678	3.367	256.786	0.028	0.049	1.05									41807813	10984	1182.99	0.311	11409	0.323	0.0104	95.9	tests performed						52589					1488	6841	0.019	67.59	35340680	15.322
SAU	Asia	Saudi Arabia	2022-04-22	753241	117	120.714	9075	0	1.286	21313.7	3.311	3.416	256.786	0	0.036	1.04									41817866	10053	1183.28	0.284	11521	0.326	0.0105	95.4	tests performed						52589					1488	6841	0.019	67.59	35340680	15.322
SAU	Asia	Saudi Arabia	2022-04-23	753332	91	121.857	9076	1	1.143	21316.3	2.575	3.448	256.815	0.028	0.032	1.04									41827109	9243	1183.54	0.262	11388	0.322	0.0107	93.5	tests performed						52589					1488	6841	0.019	67.59	35340680	15.322
SAU	Asia	Saudi Arabia	2022-04-24	753417	85	120.714	9078	2	1.286	21318.7	2.405	3.416	256.871	0.057	0.036	1.04									41838185	11076	1183.85	0.313	11275	0.319	0.0107	93.4	tests performed						52589					1488	6841	0.019	67.59	35340680	15.322
SAU	Asia	Saudi Arabia	2022-04-25	753526	109	117.286	9079	1	1.429	21321.8	3.084	3.319	256.899	0.028	0.04	1.05									41849069	10884	1184.16	0.308	11043	0.312	0.0106	94.2	tests performed						52589					1488	6841	0.019	67.59	35340680	15.322
SAU	Asia	Saudi Arabia	2022-04-26	753632	106	112	9082	3	1.429	21324.8	2.999	3.169	256.984	0.085	0.04	1.06									41860482	11413	1184.48	0.323	10984	0.311	0.0102	98.1	tests performed						52589					1488	6841	0.019	67.59	35340680	15.322
SAU	Asia	Saudi Arabia	2022-04-27	753730	98	105.143	9084	2	1.429	21327.5	2.773	2.975	257.041	0.057	0.04	1.08									41872220	11738	1184.82	0.332	10770	0.305	0.0098	102.4	tests performed						52589					1488	6841	0.019	67.59	35340680	15.322
SAU	Asia	Saudi Arabia	2022-04-28	753822	92	99.714	9085	1	1.429	21330.2	2.603	2.822	257.069	0.028	0.04	1.11									41883167	10947	1185.13	0.31	10765	0.305	0.0093	108	tests performed						52589					1488	6841	0.019	67.59	35340680	15.322
SAU	Asia	Saudi Arabia	2022-04-29	753921	99	97.143	9086	1	1.571	21333	2.801	2.749	257.097	0.028	0.044	1.14									41892775	9608	1185.4	0.272	10701	0.303	0.0091	110.2	tests performed						52589					1488	6841	0.019	67.59	35340680	15.322
SAU	Asia	Saudi Arabia	2022-04-30	754011	90	97	9088	2	1.714	21335.5	2.547	2.745	257.154	0.057	0.049	1.18									41902465	9690	1185.67	0.274	10765	0.305	0.009	111	tests performed						52589					1488	6841	0.019	67.59	35340680	15.322
SAU	Asia	Saudi Arabia	2022-05-01	754110	99	99	9089	1	1.571	21338.3	2.801	2.801	257.182	0.028	0.044	1.22									41912766	10301	1185.96	0.291	10654	0.301	0.0093	107.6	tests performed						52589					1488	6841	0.019	67.59	35340680	15.322
SAU	Asia	Saudi Arabia	2022-05-02	754238	128	101.714	9093	4	2	21341.9	3.622	2.878	257.296	0.113	0.057	1.27									41921522	8756	1186.21	0.248	10350	0.293	0.0098	101.8	tests performed						52589					1488	6841	0.019	67.59	35340680	15.322
SAU	Asia	Saudi Arabia	2022-05-03	754340	102	101.143	9093	0	1.571	21344.8	2.886	2.862	257.296	0	0.044	1.33									41930549	9027	1186.47	0.255	10010	0.283	0.0101	99	tests performed						52589					1488	6841	0.019	67.59	35340680	15.322
SAU	Asia	Saudi Arabia	2022-05-04	754464	124	104.857	9094	1	1.429	21348.3	3.509	2.967	257.324	0.028	0.04	1.4									41940947	10398	1186.76	0.294	9818	0.278	0.0107	93.6	tests performed						52589					1488	6841	0.019	67.59	35340680	15.322
SAU	Asia	Saudi Arabia	2022-05-05	754623	159	114.429	9096	2	1.571	21352.8	4.499	3.238	257.38	0.057	0.044	1.47									41954451	13504	1187.14	0.382	10183	0.288	0.0112	89	tests performed						52589					1488	6841	0.019	67.59	35340680	15.322
SAU	Asia	Saudi Arabia	2022-05-06	754842	219	131.571	9099	3	1.857	21359	6.197	3.723	257.465	0.085	0.053	1.55									41966629	12178	1187.49	0.345	10551	0.299	0.0125	80.2	tests performed						52589					1488	6841	0.019	67.59	35340680	15.322
SAU	Asia	Saudi Arabia	2022-05-07	755076	234	152.143	9099	0	1.571	21365.6	6.621	4.305	257.465	0	0.044	1.62									41982063	15434	1187.92	0.437	11371	0.322	0.0134	74.7	tests performed						52589					1488	6841	0.019	67.59	35340680	15.322
SAU	Asia	Saudi Arabia	2022-05-08	755415	339	186.429	9103	4	2	21375.2	9.592	5.275	257.579	0.113	0.057	1.67									42006583	24520	1188.62	0.694	13402	0.379	0.0139	71.9	tests performed						52589					1488	6841	0.019	67.59	35340680	15.322
SAU	Asia	Saudi Arabia	2022-05-09	755980	565	248.857	9104	1	1.571	21391.2	15.987	7.042	257.607	0.028	0.044	1.7									42027011	20428	1189.2	0.578	15070	0.426	0.0165	60.6	tests performed						52589					1488	6841	0.019	67.59	35340680	15.322
SAU	Asia	Saudi Arabia	2022-05-10	756549	569	315.571	9104	0	1.571	21407.3	16.1	8.929	257.607	0	0.044	1.69									42049904	22893	1189.84	0.648	17051	0.482	0.0185	54	tests performed						52589					1488	6841	0.019	67.59	35340680	15.322
SAU	Asia	Saudi Arabia	2022-05-11	757191	642	389.571	9108	4	2	21425.5	18.166	11.023	257.72	0.113	0.057	1.66									42072272	22368	1190.48	0.633	18761	0.531	0.0208	48.2	tests performed						52589					1488	6841	0.019	67.59	35340680	15.322
SAU	Asia	Saudi Arabia	2022-05-12	757802	611	454.143	9110	2	2	21442.8	17.289	12.85	257.777	0.057	0.057	1.61									42099496	27224	1191.25	0.77	20721	0.586	0.0219	45.6	tests performed						52589					1488	6841	0.019	67.59	35340680	15.322
SAU	Asia	Saudi Arabia	2022-05-13	758361	559	502.714	9111	1	1.714	21458.6	15.817	14.225	257.805	0.028	0.049	1.55									42122082	22586	1191.89	0.639	22208	0.628	0.0226	44.2	tests performed						52589					1488	6841	0.019	67.59	35340680	15.322
SAU	Asia	Saudi Arabia	2022-05-14	758795	434	531.286	9114	3	2.143	21470.9	12.28	15.033	257.89	0.085	0.061	1.5									42144179	22097	1192.51	0.625	23159	0.655	0.0229	43.6	tests performed						52589					1488	6841	0.019	67.59	35340680	15.322
SAU	Asia	Saudi Arabia	2022-05-15	759226	431	544.429	9116	2	1.857	21483.1	12.196	15.405	257.946	0.057	0.053	1.45									42173211	29032	1193.33	0.821	23804	0.674	0.0229	43.7	tests performed						52589					1488	6841	0.019	67.59	35340680	15.322
SAU	Asia	Saudi Arabia	2022-05-16	759856	630	553.714	9118	2	2	21500.9	17.826	15.668	258.003	0.057	0.057	1.4									42203144	29933	1194.18	0.847	25162	0.712	0.022	45.4	tests performed						52589					1488	6841	0.019	67.59	35340680	15.322
SAU	Asia	Saudi Arabia	2022-05-17	760477	621	561.143	9121	3	2.429	21518.5	17.572	15.878	258.088	0.085	0.069	1.36									42232307	29163	1195.01	0.825	26058	0.737	0.0215	46.4	tests performed						52589					1488	6841	0.019	67.59	35340680	15.322
SAU	Asia	Saudi Arabia	2022-05-18	761079	602	555.429	9123	2	2.143	21535.5	17.034	15.716	258.144	0.057	0.061	1.32									42258911	26604	1195.76	0.753	26663	0.754	0.0208	48	tests performed						52589					1488	6841	0.019	67.59	35340680	15.322
SAU	Asia	Saudi Arabia	2022-05-19	761624	545	546	9124	1	2	21550.9	15.421	15.45	258.173	0.028	0.057	1.29									42285749	26838	1196.52	0.759	26608	0.753	0.0205	48.7	tests performed						52589					1488	6841	0.019	67.59	35340680	15.322
SAU	Asia	Saudi Arabia	2022-05-20	762164	540	543.286	9127	3	2.286	21566.2	15.28	15.373	258.258	0.085	0.065	1.26									42305979	20230	1197.09	0.572	26271	0.743	0.0207	48.4	tests performed						52589					1488	6841	0.019	67.59	35340680	15.322
SAU	Asia	Saudi Arabia	2022-05-21	762575	411	540	9128	1	2	21577.8	11.63	15.28	258.286	0.028	0.057	1.23									42329395	23416	1197.75	0.663	26459	0.749	0.0204	49	tests performed						52589					1488	6841	0.019	67.59	35340680	15.322
SAU	Asia	Saudi Arabia	2022-05-22	763042	467	545.143	9130	2	2	21591	13.214	15.425	258.343	0.057	0.057	1.21									42358052	28657	1198.56	0.811	26406	0.747	0.0206	48.4	tests performed						52589					1488	6841	0.019	67.59	35340680	15.322
SAU	Asia	Saudi Arabia	2022-05-23	763692	650	548	9131	1	1.857	21609.4	18.392	15.506	258.371	0.028	0.053	1.19									42384395	26343	1199.31	0.745	25893	0.733	0.0212	47.2	tests performed						52589					1488	6841	0.019	67.59	35340680	15.322
SAU	Asia	Saudi Arabia	2022-05-24	764249	557	538.857	9134	3	1.857	21625.2	15.761	15.248	258.456	0.085	0.053	1.17									42409621	25226	1200.02	0.714	25331	0.717	0.0213	47	tests performed						52589					1488	6841	0.019	67.59	35340680	15.322
SAU	Asia	Saudi Arabia	2022-05-25	764789	540	530	9135	1	1.714	21640.5	15.28	14.997	258.484	0.028	0.049	1.16									42434230	24609	1200.72	0.696	25046	0.709	0.0212	47.3	tests performed						52589					1488	6841	0.019	67.59	35340680	15.322
SAU	Asia	Saudi Arabia	2022-05-26	765305	516	525.857	9138	3	2	21655.1	14.601	14.88	258.569	0.085	0.057	1.16									42458064	23834	1201.39	0.674	24616	0.697	0.0214	46.8	tests performed						52589					1488	6841	0.019	67.59	35340680	15.322
SAU	Asia	Saudi Arabia	2022-05-27	765788	483	517.714	9140	2	1.857	21668.7	13.667	14.649	258.625	0.057	0.053	1.16									42476760	18696	1201.92	0.529	24397	0.69	0.0212	47.1	tests performed						52589					1488	6841	0.019	67.59	35340680	15.322
SAU	Asia	Saudi Arabia	2022-05-28	766196	408	517.286	9143	3	2.143	21680.3	11.545	14.637	258.71	0.085	0.061	1.16									42499701	22941	1202.57	0.649	24329	0.688	0.0213	47	tests performed						52589					1488	6841	0.019	67.59	35340680	15.322
SAU	Asia	Saudi Arabia	2022-05-29	766726	530	526.286	9144	1	2	21695.3	14.997	14.892	258.739	0.028	0.057	1.16									42527204	27503	1203.35	0.778	24165	0.684	0.0218	45.9	tests performed						52589					1488	6841	0.019	67.59	35340680	15.322
SAU	Asia	Saudi Arabia	2022-05-30	767412	686	531.429	9145	1	2	21714.7	19.411	15.037	258.767	0.028	0.057	1.17									42555915	28711	1204.16	0.812	24503	0.693	0.0217	46.1	tests performed						52589					1488	6841	0.019	67.59	35340680	15.322
SAU	Asia	Saudi Arabia	2022-05-31	768079	667	547.143	9148	3	2	21733.6	18.873	15.482	258.852	0.085	0.057	1.18									42579588	23673	1204.83	0.67	24281	0.687	0.0225	44.4	tests performed						52589					1488	6841	0.019	67.59	35340680	15.322
SAU	Asia	Saudi Arabia	2022-06-01	768648	569	551.286	9149	1	2	21749.7	16.1	15.599	258.88	0.028	0.057	1.19									42610541	30953	1205.71	0.876	25187	0.713	0.0219	45.7	tests performed						52589					1488	6841	0.019	67.59	35340680	15.322
SAU	Asia	Saudi Arabia	2022-06-02	769423	775	588.286	9151	2	1.857	21771.6	21.929	16.646	258.937	0.057	0.053	1.2									42636462	25921	1206.44	0.733	25485	0.721	0.0231	43.3	tests performed						52589					1488	6841	0.019	67.59	35340680	15.322
SAU	Asia	Saudi Arabia	2022-06-03	770085	662	613.857	9152	1	1.714	21790.3	18.732	17.37	258.965	0.028	0.049	1.21									42658581	22119	1207.07	0.626	25974	0.735	0.0236	42.3	tests performed						52589					1488	6841	0.019	67.59	35340680	15.322
SAU	Asia	Saudi Arabia	2022-06-04	770650	565	636.286	9155	3	1.714	21806.3	15.987	18.004	259.05	0.085	0.049	1.22									42683591	25010	1207.78	0.708	26270	0.743	0.0242	41.3	tests performed						52589					1488	6841	0.019	67.59	35340680	15.322
SAU	Asia	Saudi Arabia	2022-06-05	771302	652	653.714	9156	1	1.714	21824.8	18.449	18.498	259.078	0.028	0.049	1.23									42718111	34520	1208.75	0.977	27272	0.772	0.024	41.7	tests performed						52589					1488	6841	0.019	67.59	35340680	15.322
SAU	Asia	Saudi Arabia	2022-06-06	772269	967	693.857	9158	2	1.857	21852.1	27.362	19.633	259.135	0.057	0.053	1.24									42752469	34358	1209.72	0.972	28079	0.795	0.0247	40.5	tests performed						52589					1488	6841	0.019	67.59	35340680	15.322
SAU	Asia	Saudi Arabia	2022-06-07	773221	952	734.571	9160	2	1.714	21879.1	26.938	20.785	259.191	0.057	0.049	1.24									42789062	36593	1210.76	1.035	29925	0.847	0.0245	40.7	tests performed						52589					1488	6841	0.019	67.59	35340680	15.322
SAU	Asia	Saudi Arabia	2022-06-08	774250	1029	800.286	9163	3	2	21908.2	29.117	22.645	259.276	0.085	0.057	1.25									42821949	32887	1211.69	0.931	30201	0.855	0.0265	37.7	tests performed						52589					1488	6841	0.019	67.59	35340680	15.322
SAU	Asia	Saudi Arabia	2022-06-09	775205	955	826	9165	2	2	21935.2	27.023	23.372	259.333	0.057	0.057	1.24									42854570	32621	1212.61	0.923	31158	0.882	0.0265	37.7	tests performed						52589					1488	6841	0.019	67.59	35340680	15.322
SAU	Asia	Saudi Arabia	2022-06-10	776137	932	864.571	9167	2	2.143	21961.6	26.372	24.464	259.389	0.057	0.061	1.24									42880569	25999	1213.35	0.736	31713	0.897	0.0273	36.7	tests performed						52589					1488	6841	0.019	67.59	35340680	15.322
SAU	Asia	Saudi Arabia	2022-06-11	776890	753	891.429	9170	3	2.143	21982.9	21.307	25.224	259.474	0.085	0.061	1.24									42910389	29820	1214.19	0.844	32400	0.917	0.0275	36.3	tests performed						52589					1488	6841	0.019	67.59	35340680	15.322
SAU	Asia	Saudi Arabia	2022-06-12	777795	905	927.571	9173	3	2.429	22008.5	25.608	26.247	259.559	0.085	0.069	1.23									42947407	37018	1215.24	1.047	32757	0.927	0.0283	35.3	tests performed						52589					1488	6841	0.019	67.59	35340680	15.322
SAU	Asia	Saudi Arabia	2022-06-13	778983	1188	959.143	9175	2	2.429	22042.1	33.616	27.14	259.616	0.057	0.069	1.23									42983510	36103	1216.26	1.022	33006	0.934	0.0291	34.4	tests performed						52589					1488	6841	0.019	67.59	35340680	15.322
SAU	Asia	Saudi Arabia	2022-06-14	780135	1152	987.714	9176	1	2.286	22074.7	32.597	27.948	259.644	0.028	0.065	1.23									43015518	32008	1217.17	0.906	32351	0.915	0.0305	32.8	tests performed						52589					1488	6841	0.019		35340680	15.322
SAU	Asia	Saudi Arabia	2022-06-15	781168	1033	988.286	9179	3	2.286	22103.9	29.23	27.965	259.729	0.085	0.065	1.23									43045779	30261	1218.02	0.856	31976	0.905	0.0309	32.4	tests performed	66580990	26692710	25058107			52589	188.4	75.53	70.9		1488	6841	0.019		35340680	15.322
SAU	Asia	Saudi Arabia	2022-06-16	782131	963	989.429	9180	1	2.143	22131.2	27.249	27.997	259.757	0.028	0.061																																	35340680	15.322
[truncated: 17 more columns]
